# Supplementary material
Source: publisher site journal article supplement (https://www.dovepress.com/article/111103)
Supplement: Supplementary file 1 [file get_supplementary_file.php]

Protein Name

Cluster of Glial fibrillary acidic protein OS=Homo sapiens GN=GFAP PE=1 SV=1 (P14  
Serum albumin OS=Homo sapiens GN=ALB PE=1 SV=2  
Cluster of Isoform 3 of Plectin OS=Homo sapiens GN=PLEC (Q15149-3)  
Cluster of Hemoglobin subunit beta OS=Homo sapiens GN=HBB PE=1 SV=2 (P68871)  
Vimentin OS=Homo sapiens GN=VIM PE=1 SV=4  
Cluster of Tubulin beta-3 chain OS=Homo sapiens GN=TUBB3 PE=1 SV=2 (Q13509)  
Cluster of Actin, cytoplasmic 1 OS=Homo sapiens GN=ACTB PE=1 SV=1 (P60709)  
Cluster of Tubulin alpha-1B chain OS=Homo sapiens GN=TUBA1B PE=1 SV=1 (P68363)  
Cluster of Isoform 2 of Spectrin alpha chain, non-erythrocytic 1 OS=Homo sapiens  
Hemoglobin subunit alpha OS=Homo sapiens GN=HBA1 PE=1 SV=2  
Cluster of Spectrin beta chain, non-erythrocytic 1 OS=Homo sapiens GN=SPTBN1 PE=1  
Cluster of Pyruvate kinase isozymes M1/M2 OS=Homo sapiens GN=PKM PE=1 SV=4 (P1461  
Glyceraldehyde-3-phosphate dehydrogenase OS=Homo sapiens GN=GAPDH PE=1 SV=3  
Clathrin heavy chain 1 OS=Homo sapiens GN=CLTC PE=1 SV=5  
Filamin-A OS=Homo sapiens GN=FLNA PE=1 SV=4  
Cytoplasmic dynein 1 heavy chain 1 OS=Homo sapiens GN=DYNC1H1 PE=1 SV=5  
Cluster of ATPase, Na<sup>+</sup>/K<sup>+</sup> transporting, alpha 2 (+) polypeptide OS=Homo sapiens G  
Fibrinogen beta chain OS=Homo sapiens GN=FGB PE=1 SV=2  
Fibrinogen alpha chain OS=Homo sapiens GN=FGA PE=1 SV=2  
Dihydropyrimidinase-related protein 2 OS=Homo sapiens GN=DPYSL2 PE=1 SV=1  
Cluster of Alpha-actinin-1 OS=Homo sapiens GN=ACTN1 PE=1 SV=2 (P12814)  
60 kDa heat shock protein, mitochondrial OS=Homo sapiens GN=HSPD1 PE=1 SV=2  
ATP synthase subunit alpha, mitochondrial OS=Homo sapiens GN=ATP5A1 PE=1 SV=1  
Apolipoprotein A-I OS=Homo sapiens GN=APOA1 PE=1 SV=1  
2',3'-cyclic-nucleotide 3'-phosphodiesterase OS=Homo sapiens GN=CNP PE=1 SV=2  
Creatine kinase B-type OS=Homo sapiens GN=CKB PE=1 SV=1  
Alpha-enolase OS=Homo sapiens GN=ENO1 PE=1 SV=2  
Complement C3 OS=Homo sapiens GN=C3 PE=1 SV=2  
Glutamate dehydrogenase 1, mitochondrial OS=Homo sapiens GN=GLUD1 PE=1 SV=2  
Cluster of Elongation factor 1-alpha 1 OS=Homo sapiens GN=EEF1A1 PE=1 SV=1 (P6810  
Serotransferrin OS=Homo sapiens GN=TF PE=1 SV=3  
Cluster of Myelin basic protein OS=Homo sapiens GN=MBP PE=1 SV=3 (P02686)  
Neurofilament light polypeptide OS=Homo sapiens GN=NEFL PE=1 SV=3  
Isoform V2 of Versican core protein OS=Homo sapiens GN=VCAN  
Heat shock protein HSP 90-alpha OS=Homo sapiens GN=HSP90AA1 PE=1 SV=5  
Annexin OS=Homo sapiens GN=ANXA6 PE=3 SV=3  
Cluster of Fibrinogen gamma chain OS=Homo sapiens GN=FGG PE=1 SV=3 (P02679)  
Annexin A1 OS=Homo sapiens GN=ANXA1 PE=1 SV=2  
Neuroblast differentiation-associated protein AHNAK OS=Homo sapiens GN=AHNAK PE=1  
14-3-3 protein epsilon OS=Homo sapiens GN=YWHAE PE=1 SV=1  
Nestin OS=Homo sapiens GN=NES PE=1 SV=2  
Heat shock cognate 71 kDa protein OS=Homo sapiens GN=HSPA8 PE=1 SV=1  
Neurofilament medium polypeptide OS=Homo sapiens GN=NEFM PE=3 SV=1  
Tenascin OS=Homo sapiens GN=TNC PE=1 SV=3  
Microtubule-associated protein 1B OS=Homo sapiens GN=MAP1B PE=1 SV=2  
ATP synthase subunit beta OS=Homo sapiens GN=ATP5B PE=3 SV=1

Alpha-2-macroglobulin OS=Homo sapiens GN=A2M PE=1 SV=3  
Cluster of Complement component C4B (Childo blood group) OS=Homo sapiens GN=C4B-1  
Cluster of Isoform 2 of Gelsolin OS=Homo sapiens GN=GSN (P06396-2)  
Phosphoglycerate kinase 1 OS=Homo sapiens GN=PGK1 PE=1 SV=3  
Cluster of Ig gamma-1 chain C region OS=Homo sapiens GN=IGHG1 PE=1 SV=1 (P01857)  
Annexin A5 OS=Homo sapiens GN=ANXA5 PE=1 SV=2  
Cluster of Histone H2B type 1-0 OS=Homo sapiens GN=HIST1H2B0 PE=1 SV=3 (P23527)  
Myosin-9 OS=Homo sapiens GN=MYH9 PE=1 SV=4  
Aconitase 2, mitochondrial OS=Homo sapiens GN=ACO2 PE=4 SV=1  
Fructose-bisphosphate aldolase A OS=Homo sapiens GN=ALDOA PE=1 SV=2  
Malate dehydrogenase, mitochondrial OS=Homo sapiens GN=MDH2 PE=1 SV=3  
Cluster of Isoform 2 of Dynamin-1 OS=Homo sapiens GN=DNM1 (Q05193-2)  
Alpha-crystallin B chain OS=Homo sapiens GN=CRYAB PE=1 SV=2  
Ubiquitin carboxyl-terminal hydrolase isozyme L1 OS=Homo sapiens GN=UCHL1 PE=1 SV=1  
Cluster of Peptidyl-prolyl cis-trans isomerase A OS=Homo sapiens GN=PPIA PE=1 SV=1  
Filamin-C OS=Homo sapiens GN=FLNC PE=1 SV=3  
Brevican core protein OS=Homo sapiens GN=BCAN PE=1 SV=2  
Transketolase OS=Homo sapiens GN=TKT PE=4 SV=1  
Protein disulfide isomerase family A, member 3, isoform CRA\_b OS=Homo sapiens GN=PDIA3 PE=1 SV=1  
Gamma-enolase OS=Homo sapiens GN=ENO2 PE=1 SV=3  
Carbonyl reductase [NADPH] 1 OS=Homo sapiens GN=CBR1 PE=1 SV=3  
Myelin proteolipid protein OS=Homo sapiens GN=PLP1 PE=1 SV=2  
Alpha-internexin OS=Homo sapiens GN=INA PE=1 SV=2  
Annexin A2 OS=Homo sapiens GN=ANXA2 PE=1 SV=2  
Heat shock protein HSP 90-beta OS=Homo sapiens GN=HSP90AB1 PE=1 SV=4  
Fructose-bisphosphate aldolase C OS=Homo sapiens GN=ALDOC PE=1 SV=2  
Heat shock 70 kDa protein 1A/1B OS=Homo sapiens GN=HSPA1A PE=1 SV=5  
Hexokinase-1 OS=Homo sapiens GN=HK1 PE=4 SV=1  
Endoplasmic reticulum chaperone protein OS=Homo sapiens GN=HSP90B1 PE=1 SV=1  
Histone H4 OS=Homo sapiens GN=HIST1H4A PE=1 SV=2  
Alpha-1-antitrypsin OS=Homo sapiens GN=SERPINA1 PE=1 SV=3  
Elongation factor Tu, mitochondrial OS=Homo sapiens GN=TUFM PE=1 SV=2  
Cluster of Guanine nucleotide-binding protein G(I)/G(S)/G(T) subunit beta-1 OS=Homo sapiens GN=GNB1 PE=1 SV=1  
Peroxiredoxin-1 OS=Homo sapiens GN=PRDX1 PE=1 SV=1  
Septin-7 OS=Homo sapiens GN=SEPT7 PE=1 SV=2  
Amine oxidase [flavin-containing] B OS=Homo sapiens GN=MAOB PE=2 SV=1  
Galectin-1 OS=Homo sapiens GN=LGALS1 PE=1 SV=2  
78 kDa glucose-regulated protein OS=Homo sapiens GN=HSPA5 PE=1 SV=2  
Lactoferrin OS=Homo sapiens GN=LTF PE=4 SV=1  
Rab GDP dissociation inhibitor alpha OS=Homo sapiens GN=GDI1 PE=1 SV=2  
L-lactate dehydrogenase B chain OS=Homo sapiens GN=LDHB PE=1 SV=2  
Cluster of Ig lambda-2 chain C regions OS=Homo sapiens GN=IGLC2 PE=1 SV=1 (P0CG05)  
Tenascin-R OS=Homo sapiens GN=TNR PE=1 SV=3  
Cluster of Neural cell adhesion molecule 1 OS=Homo sapiens GN=NCAM1 PE=1 SV=3 (P1)  
Heat shock protein beta-1 OS=Homo sapiens GN=HSPB1 PE=1 SV=2  
Cluster of Isoform 2 of Ankyrin-2 OS=Homo sapiens GN=ANK2 (Q01484-2)  
Talin-1 OS=Homo sapiens GN=TLN1 PE=1 SV=3

Phosphatidylethanolamine-binding protein 1 OS=Homo sapiens GN=PEBP1 PE=1 SV=3  
14-3-3 protein zeta/delta OS=Homo sapiens GN=YWHAZ PE=1 SV=1  
Phosphoserine aminotransferase OS=Homo sapiens GN=PSAT1 PE=1 SV=2  
Cluster of Calnexin OS=Homo sapiens GN=CANX PE=2 SV=1 (B4DGP8)  
Cluster of Phosphoglycerate mutase 1 OS=Homo sapiens GN=PGAM1 PE=1 SV=2 (P18669)  
Receptor-type tyrosine-protein phosphatase zeta OS=Homo sapiens GN=PTPRZ1 PE=1 SV=1  
Cluster of Plasma membrane calcium-transporting ATPase 4 OS=Homo sapiens GN=ATP2B  
Triosephosphate isomerase OS=Homo sapiens GN=TPI1 PE=1 SV=3  
N(G),N(G)-dimethylarginine dimethylaminohydrolase 1 OS=Homo sapiens GN=DDAH1 PE=1  
Elongation factor 2 OS=Homo sapiens GN=EEF2 PE=1 SV=4  
Vesicle-fusing ATPase OS=Homo sapiens GN=NSF PE=1 SV=3  
Isoform LCRMP-4 of Dihydropyrimidinase-related protein 3 OS=Homo sapiens GN=DPYSL  
Microtubule-associated protein OS=Homo sapiens GN=MAP4 PE=4 SV=1  
Isoform 2 of Syntaxin-binding protein 1 OS=Homo sapiens GN=STXBP1  
Cofilin-1 OS=Homo sapiens GN=CFL1 PE=4 SV=1  
Cluster of Stress-70 protein, mitochondrial OS=Homo sapiens GN=HSPA9 PE=1 SV=2 (P  
Isocitrate dehydrogenase [NADP], mitochondrial OS=Homo sapiens GN=IDH2 PE=1 SV=2  
Moesin OS=Homo sapiens GN=MSN PE=1 SV=3  
Transitional endoplasmic reticulum ATPase OS=Homo sapiens GN=VCP PE=1 SV=4  
NAD(P) transhydrogenase, mitochondrial OS=Homo sapiens GN=NNT PE=1 SV=3  
Ubiquitin OS=Homo sapiens GN=UBB PE=2 SV=1  
Band 4.1-like protein 2 OS=Homo sapiens GN=EPB41L2 PE=4 SV=1  
Cluster of Ezrin OS=Homo sapiens GN=EZR PE=1 SV=4 (P15311)  
Septin-2 OS=Homo sapiens GN=SEPT2 PE=3 SV=1  
14-3-3 protein theta OS=Homo sapiens GN=YWHAQ PE=1 SV=1  
Cluster of Mitogen-activated protein kinase 1 OS=Homo sapiens GN=MAPK1 PE=1 SV=3  
WD repeat-containing protein 1 OS=Homo sapiens GN=WDR1 PE=1 SV=4  
Ig kappa chain C region OS=Homo sapiens GN=IGKC PE=1 SV=1  
4-trimethylaminobutyraldehyde dehydrogenase OS=Homo sapiens GN=ALDH9A1 PE=1 SV=3  
Synemin OS=Homo sapiens GN=SYNM PE=1 SV=2  
Reticulon-4 OS=Homo sapiens GN=RTN4 PE=1 SV=2  
Malate dehydrogenase, cytoplasmic OS=Homo sapiens GN=MDH1 PE=3 SV=1  
Filamin-B OS=Homo sapiens GN=FLNB PE=1 SV=2  
Trifunctional enzyme subunit alpha, mitochondrial OS=Homo sapiens GN=HADHA PE=1 S  
Cluster of Protein disulfide-isomerase OS=Homo sapiens GN=P4HB PE=1 SV=3 (P07237)  
Cluster of Histone H2A.Z OS=Homo sapiens GN=H2AFZ PE=1 SV=2 (POCOS5)  
Cluster of Glycogen phosphorylase, brain form OS=Homo sapiens GN=PYGB PE=1 SV=5 ( Alpha-aminoadipic semialdehyde dehydrogenase OS=Homo sapiens GN=ALDH7A1 PE=1 SV=5  
Cytosolic non-specific dipeptidase OS=Homo sapiens GN=CNDP2 PE=1 SV=2  
Microtubule-associated protein 2 OS=Homo sapiens GN=MAP2 PE=1 SV=4  
Peroxioredoxin-2 OS=Homo sapiens GN=PRDX2 PE=1 SV=5  
Major vault protein OS=Homo sapiens GN=MVP PE=1 SV=4  
Collagen alpha-3(VI) chain OS=Homo sapiens GN=COL6A3 PE=4 SV=1  
Apolipoprotein E OS=Homo sapiens GN=APOE PE=1 SV=1  
Voltage-dependent anion-selective channel protein 1 OS=Homo sapiens GN=VDAC1 PE=1  
Cluster of AP-2 complex subunit beta OS=Homo sapiens GN=AP2B1 PE=1 SV=1 (P63010)  
V-type proton ATPase catalytic subunit A OS=Homo sapiens GN=ATP6V1A PE=2 SV=1

D-3-phosphoglycerate dehydrogenase OS=Homo sapiens GN=PHGDH PE=1 SV=4  
Contactin-1 OS=Homo sapiens GN=CNTN1 PE=1 SV=1  
Chaperonin containing TCP1, subunit 8 (Theta), isoform CRA\_a OS=Homo sapiens GN=C  
Methylmalonate-semialdehyde dehydrogenase [acylating], mitochondrial OS=Homo sapi  
Haptoglobin OS=Homo sapiens GN=HP PE=1 SV=1  
Prelamin-A/C OS=Homo sapiens GN=LMNA PE=1 SV=1  
Glutathione S-transferase P OS=Homo sapiens GN=GSTP1 PE=1 SV=2  
Guanine nucleotide-binding protein G(o) subunit alpha OS=Homo sapiens GN=GNAO1 PE  
Peroxisome oxidoreductin-6 OS=Homo sapiens GN=PRDX6 PE=1 SV=3  
Cluster of 1-phosphatidylinositol 4,5-bisphosphate phosphodiesterase delta-1 OS=H  
Laminin subunit beta-2 OS=Homo sapiens GN=LAMB2 PE=1 SV=2  
Fibronectin OS=Homo sapiens GN=FN1 PE=4 SV=1  
Glucose-6-phosphate isomerase OS=Homo sapiens GN=GPI PE=1 SV=4  
Ubiquitin-like modifier-activating enzyme 1 OS=Homo sapiens GN=UBA1 PE=1 SV=3  
Cluster of Isoform 2 of Neutral alpha-glucosidase AB OS=Homo sapiens GN=GANAB (Q1  
Puromycin-sensitive aminopeptidase OS=Homo sapiens GN=NPEPPS PE=4 SV=1  
4-aminobutyrate aminotransferase, mitochondrial OS=Homo sapiens GN=ABAT PE=3 SV=1  
Profilin-1 OS=Homo sapiens GN=PFN1 PE=1 SV=2  
Fatty acid synthase OS=Homo sapiens GN=FASN PE=1 SV=3  
Aldehyde dehydrogenase, mitochondrial OS=Homo sapiens GN=ALDH2 PE=3 SV=1  
Cluster of Putative adenosylhomocysteinase 2 OS=Homo sapiens GN=AHCYL1 PE=1 SV=2  
Cluster of Guanine nucleotide-binding protein G(i) subunit alpha-2 OS=Homo sapien  
Isoform Cytoplasmic+peroxisomal of Peroxisome oxidoreductin-5, mitochondrial OS=Homo sapiens  
Heat shock-related 70 kDa protein 2 OS=Homo sapiens GN=HSPA2 PE=1 SV=1  
Alpha-1-antichymotrypsin His-Pro-less OS=Homo sapiens GN=SERPINA3 PE=3 SV=1  
Adenylate kinase isoenzyme 1 OS=Homo sapiens GN=AK1 PE=1 SV=3  
Neurofilament heavy polypeptide OS=Homo sapiens GN=NEFH PE=1 SV=4  
Protein disulfide-isomerase A4 OS=Homo sapiens GN=PDIA4 PE=1 SV=2  
V-type proton ATPase subunit B, brain isoform OS=Homo sapiens GN=ATP6V1B2 PE=1 SV  
Calreticulin OS=Homo sapiens GN=CALR PE=1 SV=1  
T-complex protein 1 subunit eta OS=Homo sapiens GN=CCT7 PE=1 SV=2  
Dihydropyrimidinase-related protein 5 OS=Homo sapiens GN=DPYSL5 PE=1 SV=1  
Cluster of Band 4.1-like protein 3 OS=Homo sapiens GN=EPB41L3 PE=1 SV=2 (Q9Y2J2)  
Catenin beta-1 OS=Homo sapiens GN=CTNNB1 PE=2 SV=1  
Cluster of Isoform IB of Synapsin-1 OS=Homo sapiens GN=SYN1 (P17600-2)  
Transgelin-2 OS=Homo sapiens GN=TAGLN2 PE=1 SV=3  
Cluster of Synaptosomal-associated protein 25 OS=Homo sapiens GN=SNAP25 PE=1 SV=1  
Adenylyl cyclase-associated protein 1 OS=Homo sapiens GN=CAP1 PE=1 SV=5  
Fascin OS=Homo sapiens GN=FSCN1 PE=1 SV=3  
Trifunctional enzyme subunit beta, mitochondrial OS=Homo sapiens GN=HADHB PE=2 SV  
T-complex protein 1 subunit epsilon OS=Homo sapiens GN=CCT5 PE=2 SV=1  
T-complex protein 1 subunit beta OS=Homo sapiens GN=CCT2 PE=3 SV=2  
Protein S100-A9 OS=Homo sapiens GN=S100A9 PE=1 SV=1  
Heterogeneous nuclear ribonucleoproteins A2/B1 OS=Homo sapiens GN=HNRNPA2B1 PE=1  
6-phosphogluconate dehydrogenase, decarboxylating OS=Homo sapiens GN=PGD PE=2 SV=2  
Plasminogen OS=Homo sapiens GN=PLG PE=1 SV=2  
Keratin, type II cytoskeletal 1 OS=Homo sapiens GN=KRT1 PE=1 SV=6

Cluster of ADP/ATP translocase 1 OS=Homo sapiens GN=SLC25A4 PE=1 SV=4 (P12235)  
Isoform 1 of Four and a half LIM domains protein 1 OS=Homo sapiens GN=FHL1  
Protein DJ-1 OS=Homo sapiens GN=PARK7 PE=1 SV=2  
Tubulin polymerization-promoting protein family member 3 OS=Homo sapiens GN=TPPP3  
Myosin-10 OS=Homo sapiens GN=MYH10 PE=4 SV=1  
Clusterin OS=Homo sapiens GN=CLU PE=1 SV=1  
Cluster of Protein kinase C alpha type OS=Homo sapiens GN=PRKCA PE=1 SV=4 (P17252)  
Nicotinamide phosphoribosyltransferase OS=Homo sapiens GN=NAMPT PE=1 SV=1  
Prolow-density lipoprotein receptor-related protein 1 OS=Homo sapiens GN=LRP1 PE=1  
Cullin-associated NEDD8-dissociated protein 1 OS=Homo sapiens GN=CAND1 PE=1 SV=2  
Neuronal cell adhesion molecule OS=Homo sapiens GN=NRCAM PE=4 SV=1  
Cluster of Hypoxia up-regulated protein 1 OS=Homo sapiens GN=HYOU1 PE=3 SV=1 (E9P  
ATP synthase subunit d, mitochondrial OS=Homo sapiens GN=ATP5H PE=1 SV=3  
Superoxide dismutase [Cu-Zn] OS=Homo sapiens GN=SOD1 PE=1 SV=2  
T-complex protein 1 subunit alpha OS=Homo sapiens GN=TCP1 PE=1 SV=1  
Heat shock 70 kDa protein 4 OS=Homo sapiens GN=HSPA4 PE=1 SV=4  
Voltage-dependent anion-selective channel protein 2 OS=Homo sapiens GN=VDAC2 PE=1  
Isoform 2 of Mitochondrial inner membrane protein OS=Homo sapiens GN=IMMT  
Superoxide dismutase OS=Homo sapiens GN=SOD2 PE=2 SV=1  
Calmodulin OS=Homo sapiens GN=CALM2 PE=4 SV=1  
Aldehyde dehydrogenase 5 family, member A1 (Succinate-semialdehyde dehydrogenase)  
L-lactate dehydrogenase A chain OS=Homo sapiens GN=LDHA PE=1 SV=2  
Carbonic anhydrase 2 OS=Homo sapiens GN=CA2 PE=1 SV=2  
Vitamin D-binding protein OS=Homo sapiens GN=GC PE=1 SV=1  
Alanine--tRNA ligase, cytoplasmic OS=Homo sapiens GN=AARS PE=1 SV=2  
Heterogeneous nuclear ribonucleoprotein U OS=Homo sapiens GN=HNRNPU PE=1 SV=6  
Importin subunit beta-1 OS=Homo sapiens GN=KPNB1 PE=1 SV=2  
Stress-induced-phosphoprotein 1 OS=Homo sapiens GN=STIP1 PE=4 SV=1  
Aspartate aminotransferase, mitochondrial OS=Homo sapiens GN=GOT2 PE=1 SV=3  
Vinculin OS=Homo sapiens GN=VCL PE=1 SV=4  
Acetyl-CoA acetyltransferase, mitochondrial OS=Homo sapiens GN=ACAT1 PE=1 SV=1  
Gamma-adducin OS=Homo sapiens GN=ADD3 PE=1 SV=1  
Cluster of Ras-related protein Rab-5A OS=Homo sapiens GN=RAB5A PE=2 SV=1 (B4DJA5)  
Dolichyl-diphosphooligosaccharide--protein glycosyltransferase subunit 1 OS=Homo  
Leukotriene A-4 hydrolase OS=Homo sapiens GN=LTA4H PE=1 SV=2  
Inter-alpha-trypsin inhibitor heavy chain H2 OS=Homo sapiens GN=ITIH2 PE=1 SV=2  
NADH-ubiquinone oxidoreductase 75 kDa subunit, mitochondrial OS=Homo sapiens GN=N  
Cytosol aminopeptidase OS=Homo sapiens GN=LAP3 PE=1 SV=3  
Heterogeneous nuclear ribonucleoprotein M OS=Homo sapiens GN=HNRNPM PE=1 SV=3  
Succinyl-CoA:3-ketoacid coenzyme A transferase 1, mitochondrial OS=Homo sapiens G  
Pre-B-cell leukemia transcription factor-interacting protein 1 OS=Homo sapiens GN  
Citrate synthase OS=Homo sapiens GN=CS PE=2 SV=1  
Dihydropyrimidinase-related protein 1 OS=Homo sapiens GN=CRMP1 PE=4 SV=1  
Thioredoxin-dependent peroxide reductase, mitochondrial OS=Homo sapiens GN=PRDX3  
Very long-chain-specific acyl-CoA dehydrogenase, mitochondrial OS=Homo sapiens GN  
AP-2 complex subunit alpha-1 OS=Homo sapiens GN=AP2A1 PE=1 SV=3  
Ig alpha-1 chain C region OS=Homo sapiens GN=IGHA1 PE=1 SV=2

Epoxide hydrolase 1 OS=Homo sapiens GN=EPHX1 PE=1 SV=1  
Fumarate hydratase, mitochondrial OS=Homo sapiens GN=FH PE=1 SV=3  
Laminin subunit gamma-1 OS=Homo sapiens GN=LAMC1 PE=1 SV=3  
Electron transfer flavoprotein subunit alpha, mitochondrial OS=Homo sapiens GN=ET  
Cytochrome b-c1 complex subunit 2, mitochondrial OS=Homo sapiens GN=UQCRC2 PE=1 S  
Cluster of Kinesin-1 heavy chain OS=Homo sapiens GN=KIF5B PE=1 SV=1 (P33176)  
T-complex protein 1 subunit gamma OS=Homo sapiens GN=CCT3 PE=1 SV=4  
Protein-arginine deiminase type-2 OS=Homo sapiens GN=PADI2 PE=1 SV=2  
Cytoplasmic dynein 1 light intermediate chain 2 OS=Homo sapiens GN=DYNC1LI2 PE=2  
S-phase kinase-associated protein 1 OS=Homo sapiens GN=SKP1 PE=4 SV=1  
Protein-L-isoaspartate O-methyltransferase OS=Homo sapiens GN=PCMT1 PE=3 SV=1  
NADH-cytochrome b5 reductase 3 OS=Homo sapiens GN=CYB5R3 PE=1 SV=3  
Carbonic anhydrase 1 OS=Homo sapiens GN=CA1 PE=1 SV=2  
Pyruvate dehydrogenase E1 component subunit beta, mitochondrial OS=Homo sapiens G  
Cluster of ADP-ribosylation factor 4 OS=Homo sapiens GN=ARF4 PE=1 SV=3 (P18085)  
Lamin-B1 OS=Homo sapiens GN=LMNB1 PE=1 SV=2  
Splicing factor, proline- and glutamine-rich OS=Homo sapiens GN=SFPQ PE=1 SV=2  
Coronin-1A OS=Homo sapiens GN=CORO1A PE=1 SV=4  
Aquaporin-4 OS=Homo sapiens GN=AQP4 PE=1 SV=2  
14-3-3 protein gamma OS=Homo sapiens GN=YWHAG PE=1 SV=2  
Ras-related protein Rab-11B OS=Homo sapiens GN=RAB11B PE=1 SV=4  
Staphylococcal nuclease domain-containing protein 1 OS=Homo sapiens GN=SND1 PE=1  
RuvB-like 2 OS=Homo sapiens GN=RUVBL2 PE=1 SV=3  
Chloride intracellular channel protein 4 OS=Homo sapiens GN=CLIC4 PE=1 SV=4  
Heterogeneous nuclear ribonucleoproteins C1/C2 OS=Homo sapiens GN=HNRNPC PE=2 SV=  
MAP1A heavy chain OS=Homo sapiens GN=MAP1A PE=4 SV=1  
Serine/threonine-protein phosphatase 2A 65 kDa regulatory subunit A alpha isoform  
Isoform IIB of Myc box-dependent-interacting protein 1 OS=Homo sapiens GN=BIN1  
Myeloperoxidase OS=Homo sapiens GN=MPO PE=1 SV=1  
Ribonuclease inhibitor OS=Homo sapiens GN=RNH1 PE=1 SV=2  
Isoform 3 of Nucleoside diphosphate kinase B OS=Homo sapiens GN=NME2  
Cytochrome b-c1 complex subunit 1, mitochondrial OS=Homo sapiens GN=UQCRC1 PE=1 S  
Peroxisomal multifunctional enzyme type 2 OS=Homo sapiens GN=HSD17B4 PE=1 SV=3  
Cluster of 2-oxoglutarate dehydrogenase, mitochondrial OS=Homo sapiens GN=OGDH PE  
Cluster of Poly(rC)-binding protein 1 OS=Homo sapiens GN=PCBP1 PE=1 SV=2 (Q15365)  
Chondroitin sulfate proteoglycan 4 OS=Homo sapiens GN=CSPG4 PE=1 SV=2  
Calcium/calmodulin-dependent protein kinase type II subunit alpha OS=Homo sapiens  
Myelin oligodendrocyte glycoprotein OS=Homo sapiens GN=MOG PE=4 SV=1  
Erln-2 (Fragment) OS=Homo sapiens GN=ERLIN2 PE=4 SV=1  
Rab GDP dissociation inhibitor beta OS=Homo sapiens GN=GDI2 PE=4 SV=1  
Neurofascin OS=Homo sapiens GN=NFASC PE=4 SV=1  
Cluster of Ferritin OS=Homo sapiens GN=FTH1 PE=3 SV=1 (G3V192)  
Prohibitin-2 OS=Homo sapiens GN=PHB2 PE=4 SV=1  
Coagulation factor XIII A chain OS=Homo sapiens GN=F13A1 PE=1 SV=4  
Band 3 anion transport protein OS=Homo sapiens GN=SLC4A1 PE=1 SV=3  
Sodium/potassium-transporting ATPase subunit beta-1 OS=Homo sapiens GN=ATP1B1 PE=  
Cluster of Histone H1.4 OS=Homo sapiens GN=HIST1H1E PE=1 SV=2 (P10412)

Stathmin OS=Homo sapiens GN=STMN1 PE=1 SV=3  
Glutathione S-transferase Mu 3 OS=Homo sapiens GN=GSTM3 PE=1 SV=3  
Peptidyl-prolyl cis-trans isomerase B OS=Homo sapiens GN=PIIB PE=1 SV=2  
Adenosylhomocysteinase OS=Homo sapiens GN=AHCY PE=1 SV=4  
Delta-1-pyrroline-5-carboxylate dehydrogenase, mitochondrial OS=Homo sapiens GN=A  
Cluster of Serine/threonine-protein phosphatase 2A catalytic subunit alpha isoform  
Collagen alpha-1(XIV) chain OS=Homo sapiens GN=COL14A1 PE=1 SV=3  
Cytoplasmic FMR1-interacting protein 1 OS=Homo sapiens GN=CYFIP1 PE=1 SV=1  
Cluster of Endophilin-A1 OS=Homo sapiens GN=SH3GL2 PE=1 SV=1 (Q99962)  
Cluster of Histone H3 OS=Homo sapiens GN=H3F3A PE=2 SV=1 (B4DEB1)  
Cluster of Septin-11 OS=Homo sapiens GN=SEPT11 PE=3 SV=1 (D6RER5)  
Phosphoribosylaminoimidazole-succinocarboxamide synthase (Fragment) OS=Homo sapiens  
Phosphoribosylaminoimidazolecarboxamide formyltransferase OS=Homo sapiens GN=ATIC  
Dynactin subunit 2 OS=Homo sapiens GN=DCTN2 PE=4 SV=1  
Neurocan core protein OS=Homo sapiens GN=NCAN PE=2 SV=3  
6-phosphogluconolactonase OS=Homo sapiens GN=PGLS PE=1 SV=2  
Creatine kinase U-type, mitochondrial OS=Homo sapiens GN=CKMT1A PE=1 SV=1  
Sarcoplasmic/endoplasmic reticulum calcium ATPase 2 OS=Homo sapiens GN=ATP2A2 PE=  
Aspartate aminotransferase, cytoplasmic OS=Homo sapiens GN=GOT1 PE=1 SV=3  
Inter-alpha-trypsin inhibitor heavy chain H1 OS=Homo sapiens GN=ITIH1 PE=1 SV=3  
40S ribosomal protein S3 OS=Homo sapiens GN=RPS3 PE=1 SV=2  
Phosphoglucomutase-1 OS=Homo sapiens GN=PGM1 PE=1 SV=3  
Ras GTPase-activating-like protein IQGAP1 OS=Homo sapiens GN=IQGAP1 PE=1 SV=1  
10 kDa heat shock protein, mitochondrial OS=Homo sapiens GN=HSPE1 PE=1 SV=2  
Basement membrane-specific heparan sulfate proteoglycan core protein OS=Homo sapiens  
Serine/threonine-protein phosphatase 2B catalytic subunit alpha isoform OS=Homo sapiens  
ATP-dependent RNA helicase A OS=Homo sapiens GN=DHX9 PE=1 SV=4  
NAD-dependent protein deacetylase sirtuin-2 OS=Homo sapiens GN=SIRT2 PE=1 SV=2  
Adducin 1 (Alpha) OS=Homo sapiens GN=ADD1 PE=4 SV=1  
Sorcin OS=Homo sapiens GN=SRI PE=4 SV=2  
Cluster of Tropomyosin 1 (Alpha), isoform CRA\_m OS=Homo sapiens GN=TPM1 PE=3 SV=1  
N(G),N(G)-dimethylarginine dimethylaminohydrolase 2 OS=Homo sapiens GN=DDAH2 PE=1  
Hemopexin OS=Homo sapiens GN=HPX PE=1 SV=2  
Isoform 2 of HLA class II histocompatibility antigen gamma chain OS=Homo sapiens  
Cathepsin D OS=Homo sapiens GN=CTSD PE=1 SV=1  
Dihydropteridine reductase OS=Homo sapiens GN=QDPR PE=1 SV=2  
X-ray repair cross-complementing protein 5 OS=Homo sapiens GN=XRCC5 PE=1 SV=3  
Kinectin OS=Homo sapiens GN=KTN1 PE=1 SV=1  
X-ray repair complementing defective repair in Chinese hamster cells 6 (Ku autoan  
Neuronal-specific septin-3 OS=Homo sapiens GN=SEPT3 PE=4 SV=1  
Cluster of Probable ATP-dependent RNA helicase DDX17 OS=Homo sapiens GN=DDX17 PE=  
Prohibitin (Fragment) OS=Homo sapiens GN=PHB PE=4 SV=2  
Flotillin-2 OS=Homo sapiens GN=FLOT2 PE=4 SV=1  
Alpha-synuclein OS=Homo sapiens GN=SNCA PE=4 SV=1  
Synapsin-2 OS=Homo sapiens GN=SYN2 PE=4 SV=1  
Phosphate carrier protein, mitochondrial OS=Homo sapiens GN=SLC25A3 PE=3 SV=1  
Ceruloplasmin OS=Homo sapiens GN=CP PE=1 SV=1

Glutamine synthetase OS=Homo sapiens GN=GLUL PE=1 SV=4  
Nucleolin OS=Homo sapiens GN=NCL PE=1 SV=3  
14-3-3 protein beta/alpha OS=Homo sapiens GN=YWHAB PE=1 SV=3  
Transaldolase OS=Homo sapiens GN=TALDO1 PE=1 SV=2  
T-complex protein 1 subunit zeta OS=Homo sapiens GN=CCT6A PE=1 SV=3  
Glycerol-3-phosphate dehydrogenase, mitochondrial OS=Homo sapiens GN=GPD2 PE=1 SV=1  
Ubiquitin carboxyl-terminal hydrolase 5 OS=Homo sapiens GN=USP5 PE=1 SV=2  
Hsc70-interacting protein OS=Homo sapiens GN=ST13 PE=1 SV=2  
T-complex protein 1 subunit delta OS=Homo sapiens GN=CCT4 PE=1 SV=4  
Heterogeneous nuclear ribonucleoprotein A3 OS=Homo sapiens GN=HNRNPA3 PE=1 SV=2  
Alpha-soluble NSF attachment protein OS=Homo sapiens GN=NAPA PE=1 SV=3  
6-phosphofructokinase type C OS=Homo sapiens GN=PFKP PE=1 SV=2  
Calcyphosin OS=Homo sapiens GN=CAPS PE=1 SV=1  
Synaptic vesicle membrane protein VAT-1 homolog OS=Homo sapiens GN=VAT1 PE=1 SV=2  
Adipocyte plasma membrane-associated protein OS=Homo sapiens GN=APMAP PE=1 SV=2  
GTP-binding nuclear protein Ran OS=Homo sapiens GN=RAN PE=4 SV=1  
Programmed cell death 6-interacting protein OS=Homo sapiens GN=PDCD6IP PE=4 SV=1  
Rap1 GTPase-GDP dissociation stimulator 1 OS=Homo sapiens GN=RAP1GDS1 PE=4 SV=1  
Neuronal membrane glycoprotein M6-a OS=Homo sapiens GN=GPM6A PE=4 SV=1  
Cytosolic acyl coenzyme A thioester hydrolase OS=Homo sapiens GN=ACOT7 PE=1 SV=3  
Heat shock 70 kDa protein 12A OS=Homo sapiens GN=HSPA12A PE=1 SV=2  
Extracellular matrix protein 2 OS=Homo sapiens GN=ECM2 PE=2 SV=1  
Protein S100-B OS=Homo sapiens GN=S100B PE=1 SV=2  
Cluster of Isoform Fetal-tau of Microtubule-associated protein tau OS=Homo sapiens  
Cluster of cAMP-dependent protein kinase type I-alpha regulatory subunit OS=Homo sapiens  
Actin-related protein 3 OS=Homo sapiens GN=ACTR3 PE=1 SV=3  
Heterogeneous nuclear ribonucleoprotein K OS=Homo sapiens GN=HNRNPK PE=1 SV=1  
Tropomyosin alpha-4 chain OS=Homo sapiens GN=TPM4 PE=1 SV=3  
Cytoskeleton-associated protein 4 OS=Homo sapiens GN=CKAP4 PE=1 SV=2  
CAP-Gly domain-containing linker protein 2 OS=Homo sapiens GN=CLIP2 PE=1 SV=1  
Dynactin subunit 1 OS=Homo sapiens GN=DCTN1 PE=4 SV=2  
Cluster of Capping protein (Actin filament) muscle Z-line, beta OS=Homo sapiens GN=CLIP2 PE=1 SV=1  
Protein disulfide-isomerase A6 OS=Homo sapiens GN=PDIA6 PE=3 SV=1  
Succinyl-CoA ligase [ADP-forming] subunit beta, mitochondrial OS=Homo sapiens GN=4F2 cell-surface antigen heavy chain OS=Homo sapiens GN=SLC3A2 PE=4 SV=1  
Voltage-dependent anion-selective channel protein 3 OS=Homo sapiens GN=VDAC3 PE=4 SV=1  
Methylenetetrahydrofolate dehydrogenase OS=Homo sapiens GN=MTHFD1 PE=3 SV=1  
Heterogeneous nuclear ribonucleoprotein Q OS=Homo sapiens GN=SYNCRIP PE=1 SV=2  
Perilipin-3 OS=Homo sapiens GN=PLIN3 PE=1 SV=3  
Glutathione reductase, mitochondrial OS=Homo sapiens GN=GSR PE=1 SV=2  
Ig gamma-2 chain C region OS=Homo sapiens GN=IGHG2 PE=1 SV=2  
Ig mu chain C region OS=Homo sapiens GN=IGHM PE=1 SV=3  
Collagen alpha-1(VI) chain OS=Homo sapiens GN=COL6A1 PE=1 SV=3  
Cluster of Keratin, type I cytoskeletal 10 OS=Homo sapiens GN=KRT10 PE=1 SV=6 (P1  
Cluster of HLA class I histocompatibility antigen, A-11 alpha chain OS=Homo sapiens  
ADP-ribosyl cyclase 1 OS=Homo sapiens GN=CD38 PE=1 SV=2  
26S protease regulatory subunit 7 OS=Homo sapiens GN=PSMC2 PE=1 SV=3



V-type proton ATPase subunit E 1 OS=Homo sapiens GN=ATP6V1E1 PE=1 SV=1  
Glutathione S-transferase omega-1 OS=Homo sapiens GN=GSTO1 PE=1 SV=2  
Complement component 1 Q subcomponent-binding protein, mitochondrial OS=Homo sapiens GN=CC1Q1 PE=1 SV=1  
Lethal(2) giant larvae protein homolog 1 OS=Homo sapiens GN=LLGL1 PE=1 SV=3  
tRNA-splicing ligase RtcB homolog OS=Homo sapiens GN=C22orf28 PE=1 SV=1  
Leucine zipper transcription factor-like 1, isoform CRA\_b OS=Homo sapiens GN=LZTF1 PE=1 SV=1  
CD166 antigen OS=Homo sapiens GN=ALCAM PE=2 SV=1  
Acid ceramidase subunit beta OS=Homo sapiens GN=ASAH1 PE=4 SV=1  
Calcium/calmodulin-dependent protein kinase type II subunit delta OS=Homo sapiens GN=PKCDELTA PE=1 SV=1  
Thrombin light chain OS=Homo sapiens GN=F2 PE=3 SV=1  
Tubulin polymerization-promoting protein OS=Homo sapiens GN=TPPP PE=1 SV=1  
AP-2 complex subunit alpha-2 OS=Homo sapiens GN=AP2A2 PE=1 SV=2  
Spectrin alpha chain, erythrocytic 1 OS=Homo sapiens GN=SPTA1 PE=1 SV=5  
Catalase OS=Homo sapiens GN=CAT PE=1 SV=3  
Retinol-binding protein 1 OS=Homo sapiens GN=RBP1 PE=1 SV=2  
Annexin A4 OS=Homo sapiens GN=ANXA4 PE=1 SV=4  
Poly [ADP-ribose] polymerase 1 OS=Homo sapiens GN=PARP1 PE=1 SV=4  
Alcohol dehydrogenase class-3 OS=Homo sapiens GN=ADH5 PE=1 SV=4  
Glucosidase 2 subunit beta OS=Homo sapiens GN=PRKCSH PE=1 SV=2  
6-phosphofructokinase, liver type OS=Homo sapiens GN=PFKL PE=1 SV=6  
Myristoylated alanine-rich C-kinase substrate OS=Homo sapiens GN=MARCKS PE=1 SV=4  
ES1 protein homolog, mitochondrial OS=Homo sapiens GN=C21orf33 PE=1 SV=3  
Electron transfer flavoprotein subunit beta OS=Homo sapiens GN=ETFB PE=1 SV=3  
Cluster of Guanine nucleotide-binding protein G(q) subunit alpha OS=Homo sapiens GN=GNAS1 PE=1 SV=1  
Ras-related protein Rab-7a OS=Homo sapiens GN=RAB7A PE=1 SV=1  
Hepatocyte cell adhesion molecule OS=Homo sapiens GN=HEPACAM PE=1 SV=1  
Microtubule-associated protein RP/EB family member 1 OS=Homo sapiens GN=MAPRE1 PE=1 SV=1  
Tropomyosin 3 OS=Homo sapiens GN=TPM3 PE=2 SV=1  
ATP-dependent RNA helicase DDX1 OS=Homo sapiens GN=DDX1 PE=1 SV=2  
Heat shock protein 105 kDa OS=Homo sapiens GN=HSPH1 PE=1 SV=1  
Protein kinase C and casein kinase substrate in neurons protein 1 OS=Homo sapiens GN=CKS1B PE=1 SV=1  
Ankyrin repeat and FYVE domain-containing protein 1 OS=Homo sapiens GN=ANKFY1 PE=1 SV=1  
Drebrin OS=Homo sapiens GN=DBN1 PE=4 SV=1  
Proactivator polypeptide OS=Homo sapiens GN=PSAP PE=4 SV=1  
Dihydrolipoyl dehydrogenase OS=Homo sapiens GN=DLD PE=2 SV=1  
Complement factor B Ba fragment OS=Homo sapiens GN=CFB PE=2 SV=1  
Secernin-1 OS=Homo sapiens GN=SCRN1 PE=4 SV=2  
CD44 antigen OS=Homo sapiens GN=CD44 PE=4 SV=2  
Cluster of Isocitrate dehydrogenase [NAD] subunit alpha, mitochondrial OS=Homo sapiens GN=IDH3A PE=1 SV=1  
Microtubule-actin cross-linking factor 1, isoforms 1/2/3/5 OS=Homo sapiens GN=MAC1 PE=1 SV=1  
Eukaryotic translation initiation factor 5A-1 (Fragment) OS=Homo sapiens GN=EIF5A PE=1 SV=1  
Synaptotagmin I, isoform CRA\_b OS=Homo sapiens GN=SYT1 PE=4 SV=1  
Lamin B2, isoform CRA\_a OS=Homo sapiens GN=LMNB2 PE=4 SV=1  
BAG family molecular chaperone regulator 3 OS=Homo sapiens GN=BAG3 PE=1 SV=3  
Cystatin-B OS=Homo sapiens GN=CSTB PE=1 SV=2  
Aldose reductase OS=Homo sapiens GN=AKR1B1 PE=1 SV=3  
ATP synthase subunit b, mitochondrial OS=Homo sapiens GN=ATP5F1 PE=1 SV=2

3-ketoacyl-CoA thiolase, mitochondrial OS=Homo sapiens GN=ACAA2 PE=1 SV=2  
Dextrin OS=Homo sapiens GN=DSTN PE=1 SV=3  
Sorbitol dehydrogenase OS=Homo sapiens GN=SORD PE=1 SV=4  
Cluster of Aldo-keto reductase family 1 member C1 OS=Homo sapiens GN=AKR1C1 PE=1  
14-3-3 protein eta OS=Homo sapiens GN=YWHAH PE=1 SV=4  
Nuclear mitotic apparatus protein 1 OS=Homo sapiens GN=NUMA1 PE=1 SV=2  
Early endosome antigen 1 OS=Homo sapiens GN=EEA1 PE=1 SV=2  
Succinyl-CoA ligase [GDP-forming] subunit beta, mitochondrial OS=Homo sapiens GN=  
Isoform 5 of Sorbin and SH3 domain-containing protein 1 OS=Homo sapiens GN=SORBS1  
Septin-9 OS=Homo sapiens GN=SEPT9 PE=1 SV=2  
Quinone oxidoreductase OS=Homo sapiens GN=CRYZ PE=4 SV=1  
Protein NDRG2 OS=Homo sapiens GN=NDRG2 PE=2 SV=1  
Cluster of N-acetyl-D-glucosamine kinase OS=Homo sapiens GN=NAGK PE=2 SV=1 (B4DLZ  
2,4-dienoyl-CoA reductase, mitochondrial OS=Homo sapiens GN=DECR1 PE=2 SV=1  
40S ribosomal protein SA (Fragment) OS=Homo sapiens GN=RPSA PE=3 SV=1  
26S protease regulatory subunit 6A OS=Homo sapiens GN=PSMC3 PE=3 SV=1  
Heterogeneous nuclear ribonucleoprotein A1 OS=Homo sapiens GN=HNRNPA1 PE=4 SV=1  
60S acidic ribosomal protein P0 (Fragment) OS=Homo sapiens GN=RPLP0 PE=3 SV=1  
Actin-related protein 2/3 complex subunit 2 OS=Homo sapiens GN=ARPC2 PE=1 SV=1  
Protein S100-A8 OS=Homo sapiens GN=S100A8 PE=1 SV=1  
Complement factor H OS=Homo sapiens GN=CFH PE=1 SV=4  
Heterogeneous nuclear ribonucleoprotein L OS=Homo sapiens GN=HNRNPL PE=1 SV=2  
Aspartate--tRNA ligase, cytoplasmic OS=Homo sapiens GN=DARS PE=1 SV=2  
Laminin subunit alpha-2 OS=Homo sapiens GN=LAMA2 PE=1 SV=4  
Glutathione S-transferase Mu 2 OS=Homo sapiens GN=GSTM2 PE=1 SV=2  
Tropomodulin-1 OS=Homo sapiens GN=TMOD1 PE=1 SV=1  
Cluster of Interferon-induced guanylate-binding protein 1 OS=Homo sapiens GN=GBP1  
Lon protease homolog, mitochondrial OS=Homo sapiens GN=LONP1 PE=1 SV=2  
Excitatory amino acid transporter 2 OS=Homo sapiens GN=SLC1A2 PE=1 SV=2  
Cluster of F-actin-capping protein subunit alpha-2 OS=Homo sapiens GN=CAPZA2 PE=1  
ATP-citrate synthase OS=Homo sapiens GN=ACLY PE=1 SV=3  
Tyrosine--tRNA ligase, cytoplasmic OS=Homo sapiens GN=YARS PE=1 SV=4  
Cluster of Heterogeneous nuclear ribonucleoprotein H2 OS=Homo sapiens GN=HNRNPH2  
Eukaryotic initiation factor 4A-I OS=Homo sapiens GN=EIF4A1 PE=1 SV=1  
Cluster of Ras-related C3 botulinum toxin substrate 1 OS=Homo sapiens GN=RAC1 PE=  
Tyrosine-protein phosphatase non-receptor type substrate 1 OS=Homo sapiens GN=SIR  
Calponin-3 OS=Homo sapiens GN=CNN3 PE=1 SV=1  
Cluster of EH domain-containing protein 1 OS=Homo sapiens GN=EHD1 PE=1 SV=2 (Q9H4  
Phenylalanine--tRNA ligase beta subunit OS=Homo sapiens GN=FARSB PE=1 SV=3  
Guanine deaminase OS=Homo sapiens GN=GDA PE=1 SV=1  
Macrophage migration inhibitory factor OS=Homo sapiens GN=MIF PE=1 SV=4  
Septin-8 OS=Homo sapiens GN=SEPT8 PE=3 SV=1  
Astrocytic phosphoprotein PEA-15 OS=Homo sapiens GN=PEA15 PE=2 SV=1  
Thioredoxin OS=Homo sapiens GN=TXN PE=4 SV=1  
UTP--glucose-1-phosphate uridylyltransferase OS=Homo sapiens GN=UGP2 PE=4 SV=1  
DNA-dependent protein kinase catalytic subunit OS=Homo sapiens GN=PRKDC PE=4 SV=1  
Succinate dehydrogenase [ubiquinone] flavoprotein subunit, mitochondrial OS=Homo

Cysteine and glycine-rich protein 1 (Fragment) OS=Homo sapiens GN=CSRP1 PE=4 SV=1  
Cluster of V-type proton ATPase subunit d 1 OS=Homo sapiens GN=ATP6V0D1 PE=4 SV=1  
Cluster of Vesicle-associated membrane protein 2 OS=Homo sapiens GN=VAMP2 PE=4 SV=1  
Interleukin enhancer binding factor 3, 90kDa, isoform CRA\_b OS=Homo sapiens GN=IL  
Proteasome subunit alpha type (Fragment) OS=Homo sapiens GN=PSMA4 PE=3 SV=1  
Exportin-1 OS=Homo sapiens GN=XPO1 PE=1 SV=1  
Copine-3 OS=Homo sapiens GN=CPNE3 PE=1 SV=1  
Cluster of Paralemmin-1 OS=Homo sapiens GN=PALM PE=1 SV=2 (075781)  
Argininosuccinate synthase OS=Homo sapiens GN=ASS1 PE=1 SV=2  
Nucleophosmin OS=Homo sapiens GN=NPM1 PE=1 SV=2  
Glutathione peroxidase 1 OS=Homo sapiens GN=GPX1 PE=1 SV=4  
Calpain-1 catalytic subunit OS=Homo sapiens GN=CAPN1 PE=1 SV=1  
Bifunctional glutamate/proline--tRNA ligase OS=Homo sapiens GN=EPRS PE=1 SV=5  
Cytochrome c oxidase subunit 5B, mitochondrial OS=Homo sapiens GN=COX5B PE=1 SV=2  
Alcohol dehydrogenase [NADP(+)] OS=Homo sapiens GN=AKR1A1 PE=1 SV=3  
40S ribosomal protein S12 OS=Homo sapiens GN=RPS12 PE=1 SV=3  
Catenin alpha-2 OS=Homo sapiens GN=CTNNA2 PE=1 SV=5  
DnaJ homolog subfamily A member 1 OS=Homo sapiens GN=DNAJA1 PE=1 SV=2  
Dihydrolipoyllysine-residue succinyltransferase component of 2-oxoglutarate dehyd  
Arginine--tRNA ligase, cytoplasmic OS=Homo sapiens GN=RARS PE=1 SV=2  
Cluster of Cell division control protein 42 homolog OS=Homo sapiens GN=CDC42 PE=1  
Actin-related protein 2 OS=Homo sapiens GN=ACTR2 PE=1 SV=1  
A-kinase anchor protein 12 OS=Homo sapiens GN=AKAP12 PE=1 SV=4  
Selenium-binding protein 1 OS=Homo sapiens GN=SELENBP1 PE=1 SV=2  
Eukaryotic initiation factor 4A-II OS=Homo sapiens GN=EIF4A2 PE=1 SV=2  
Non-POU domain-containing octamer-binding protein OS=Homo sapiens GN=NONO PE=1 SV  
Cluster of Reticulon-1 OS=Homo sapiens GN=RTN1 PE=1 SV=1 (Q16799)  
Protein NDRG1 OS=Homo sapiens GN=NDRG1 PE=1 SV=1  
3-hydroxybutyrate dehydrogenase type 2 OS=Homo sapiens GN=BDH2 PE=1 SV=2  
Coronin-2B OS=Homo sapiens GN=CORO2B PE=2 SV=4  
HLA class II histocompatibility antigen, DR alpha chain OS=Homo sapiens GN=HLA-DR  
Plastin-3 OS=Homo sapiens GN=PLS3 PE=2 SV=1  
ATP synthase gamma chain OS=Homo sapiens GN=ATP5C1 PE=2 SV=1  
Elongation factor 1-gamma OS=Homo sapiens GN=EEF1G PE=2 SV=1  
Cluster of Serine/arginine-rich-splicing factor 3 OS=Homo sapiens GN=SRSF3 PE=2 S  
Myosin light polypeptide 6 OS=Homo sapiens GN=MYL6 PE=2 SV=1  
Cluster of Ras-related protein Rab-1A OS=Homo sapiens GN=RAB1A PE=2 SV=1 (B7Z8M7)  
Apolipoprotein D (Fragment) OS=Homo sapiens GN=APOD PE=4 SV=1  
26S proteasome non-ATPase regulatory subunit 2 OS=Homo sapiens GN=PSMD2 PE=4 SV=1  
Elongation factor 1-delta (Fragment) OS=Homo sapiens GN=EEF1D PE=3 SV=1  
Myosin-14 OS=Homo sapiens GN=MYH14 PE=4 SV=1  
Cluster of Spliceosome RNA helicase DDX39B OS=Homo sapiens GN=DDX39B PE=4 SV=1 (F  
Adenylate kinase 2, mitochondrial OS=Homo sapiens GN=AK2 PE=3 SV=1  
NADH dehydrogenase (Ubiquinone) flavoprotein 1, 51kDa, isoform CRA\_c OS=Homo sapi  
Paraoxonase 2, isoform CRA\_a OS=Homo sapiens GN=PON2 PE=4 SV=1  
NADH dehydrogenase [ubiquinone] 1 alpha subcomplex subunit 5 (Fragment) OS=Homo s  
6-phosphofructokinase OS=Homo sapiens GN=PFKM PE=3 SV=1

Asparagine--tRNA ligase, cytoplasmic OS=Homo sapiens GN=NARS PE=1 SV=1  
Gamma-synuclein OS=Homo sapiens GN=SNCG PE=1 SV=2  
Glutaminase kidney isoform, mitochondrial OS=Homo sapiens GN=GLS PE=1 SV=1  
Vitronectin OS=Homo sapiens GN=VTN PE=1 SV=1  
Cluster of Ras-related protein Ral-A OS=Homo sapiens GN=RALA PE=1 SV=1 (P11233)  
Neuromodulin OS=Homo sapiens GN=GAP43 PE=1 SV=1  
Trifunctional purine biosynthetic protein adenosine-3 OS=Homo sapiens GN=GART PE=  
Polypyrimidine tract-binding protein 1 OS=Homo sapiens GN=PTBP1 PE=1 SV=1  
Catenin alpha-1 OS=Homo sapiens GN=CTNNA1 PE=1 SV=1  
Serpins B6 OS=Homo sapiens GN=SERPINB6 PE=1 SV=3  
ATP synthase subunit O, mitochondrial OS=Homo sapiens GN=ATP50 PE=1 SV=1  
Myotrophin OS=Homo sapiens GN=MTPN PE=1 SV=2  
CD81 antigen OS=Homo sapiens GN=CD81 PE=1 SV=1  
Nuclear transport factor 2 OS=Homo sapiens GN=NUTF2 PE=1 SV=1  
Brain acid soluble protein 1 OS=Homo sapiens GN=BASP1 PE=1 SV=2  
116 kDa U5 small nuclear ribonucleoprotein component OS=Homo sapiens GN=EFTUD2 PE  
3-hydroxyacyl-CoA dehydrogenase type-2 OS=Homo sapiens GN=HSD17B10 PE=1 SV=3  
Endoplasmic reticulum resident protein 44 OS=Homo sapiens GN=ERP44 PE=1 SV=1  
Band 4.1-like protein 1 OS=Homo sapiens GN=EPB41L1 PE=1 SV=2  
CDGSH iron-sulfur domain-containing protein 1 OS=Homo sapiens GN=CISD1 PE=1 SV=1  
Nck-associated protein 1 OS=Homo sapiens GN=NCKAP1 PE=1 SV=1  
Talin-2 OS=Homo sapiens GN=TLN2 PE=1 SV=4  
Chromobox protein homolog 3 OS=Homo sapiens GN=CBX3 PE=1 SV=4  
Cluster of Ras-related protein Rap-1b-like protein OS=Homo sapiens PE=2 SV=1 (A6N  
Biglycan OS=Homo sapiens GN=BGN PE=2 SV=1  
Valine--tRNA ligase OS=Homo sapiens GN=VAR5 PE=3 SV=1  
Calcium-binding mitochondrial carrier protein Aralar1 OS=Homo sapiens GN=SLC25A12  
Nucleosome assembly protein 1-like 1 OS=Homo sapiens GN=NAP1L1 PE=2 SV=1  
Annexin OS=Homo sapiens GN=ANXA7 PE=2 SV=1  
Annexin OS=Homo sapiens GN=ANXA11 PE=2 SV=1  
ITIH4 protein OS=Homo sapiens GN=ITIH4 PE=2 SV=1  
Profilin-2 OS=Homo sapiens GN=PFN2 PE=4 SV=1  
Tripartite motif-containing 2, isoform CRA\_a OS=Homo sapiens GN=TRIM2 PE=4 SV=1  
NADH dehydrogenase [ubiquinone] flavoprotein 2, mitochondrial OS=Homo sapiens GN=  
Nesprin-1 OS=Homo sapiens GN=SYNE1 PE=4 SV=2  
Myelin-associated glycoprotein OS=Homo sapiens GN=MAG PE=4 SV=1  
Inosine-5'-monophosphate dehydrogenase 2 (Fragment) OS=Homo sapiens GN=IMPDH2 PE=  
Hydroxyacyl-coenzyme A dehydrogenase, mitochondrial OS=Homo sapiens GN=HADH PE=4  
Proteasome subunit alpha type-7 OS=Homo sapiens GN=PSMA7 PE=1 SV=1  
Heterogeneous nuclear ribonucleoprotein R OS=Homo sapiens GN=HNRNPR PE=1 SV=1  
Antithrombin-III OS=Homo sapiens GN=SERPINC1 PE=1 SV=1  
Propionyl-CoA carboxylase alpha chain, mitochondrial OS=Homo sapiens GN=PCCA PE=1  
Protein S100-A6 OS=Homo sapiens GN=S100A6 PE=1 SV=1  
Spectrin beta chain, erythrocytic OS=Homo sapiens GN=SPTB PE=1 SV=5  
Pyruvate carboxylase, mitochondrial OS=Homo sapiens GN=PC PE=1 SV=2  
Sodium/potassium-transporting ATPase subunit beta-2 OS=Homo sapiens GN=ATP1B2 PE=  
Calpain-2 catalytic subunit OS=Homo sapiens GN=CAPN2 PE=1 SV=6

Cadherin-2 OS=Homo sapiens GN=CDH2 PE=1 SV=4  
Tryptophan--tRNA ligase, cytoplasmic OS=Homo sapiens GN=WARS PE=1 SV=2  
14-3-3 protein sigma OS=Homo sapiens GN=SFN PE=1 SV=1  
Beta-adducin OS=Homo sapiens GN=ADD2 PE=1 SV=3  
Platelet-activating factor acetylhydrolase IB subunit alpha OS=Homo sapiens GN=PA  
Ribose-phosphate pyrophosphokinase 1 OS=Homo sapiens GN=PRPS1 PE=1 SV=2  
Ras-related protein Rab-10 OS=Homo sapiens GN=RAB10 PE=1 SV=1  
Syntaxin-1B OS=Homo sapiens GN=STX1B PE=2 SV=1  
Peptidyl-prolyl cis-trans isomerase FKBP4 OS=Homo sapiens GN=FKBP4 PE=1 SV=3  
Isoform 2 of Src substrate cortactin OS=Homo sapiens GN=CTTN  
Immunoglobulin superfamily member 8 OS=Homo sapiens GN=IGSF8 PE=1 SV=1  
Cluster of Aminopeptidase B OS=Homo sapiens GN=RNPEP PE=1 SV=2 (Q9H4A4)  
Sideroflexin-1 OS=Homo sapiens GN=SFXN1 PE=1 SV=4  
3-hydroxyacyl-CoA dehydratase 3 OS=Homo sapiens GN=PTPLAD1 PE=1 SV=2  
Glyoxylate reductase/hydroxypyruvate reductase OS=Homo sapiens GN=GRHPR PE=1 SV=1  
Nuclear migration protein nudC OS=Homo sapiens GN=NUDC PE=1 SV=1  
Cofilin-2 OS=Homo sapiens GN=CFL2 PE=1 SV=1  
Lactoylglutathione lyase OS=Homo sapiens GN=GL01 PE=1 SV=4  
Acyl-CoA-binding protein OS=Homo sapiens GN=DBI PE=1 SV=2  
Reticulon-3 OS=Homo sapiens GN=RTN3 PE=4 SV=1  
Coronin OS=Homo sapiens GN=COR01C PE=2 SV=1  
Excitatory amino acid transporter 1 OS=Homo sapiens GN=SLC1A3 PE=2 SV=1  
3' (2'), 5'-bisphosphate nucleotidase 1 OS=Homo sapiens GN=BPNT1 PE=2 SV=1  
Medium-chain-specific acyl-CoA dehydrogenase, mitochondrial OS=Homo sapiens GN=AC  
FERM, RhoGEF and pleckstrin domain-containing protein 1 OS=Homo sapiens GN=FARP1  
Actin-related protein 2/3 complex subunit 4 OS=Homo sapiens GN=ARPC4 PE=4 SV=1  
Catenin delta-1 OS=Homo sapiens GN=CTNND1 PE=4 SV=2  
Dystonin OS=Homo sapiens GN=DST PE=4 SV=1  
Phosphorylase OS=Homo sapiens GN=PYGL PE=3 SV=1  
Ubiquitin-conjugating enzyme E2 N OS=Homo sapiens GN=UBE2N PE=3 SV=1  
ATPase, H<sup>+</sup> transporting, lysosomal 50/57kDa, V1 subunit H, isoform CRA\_c OS=Homo  
ATP synthase-coupling factor 6, mitochondrial OS=Homo sapiens GN=ATP5J PE=3 SV=1  
Fatty aldehyde dehydrogenase OS=Homo sapiens GN=ALDH3A2 PE=3 SV=1  
Na(+)/H(+) exchange regulatory cofactor NHE-RF1 OS=Homo sapiens GN=SLC9A3R1 PE=1  
Laminin subunit alpha-5 OS=Homo sapiens GN=LAMA5 PE=1 SV=8  
Neural cell adhesion molecule 2 OS=Homo sapiens GN=NCAM2 PE=1 SV=2  
Fatty acid-binding protein, brain OS=Homo sapiens GN=FABP7 PE=1 SV=3  
Isocitrate dehydrogenase [NADP] cytoplasmic OS=Homo sapiens GN=IDH1 PE=1 SV=2  
Apoptosis-inducing factor 1, mitochondrial OS=Homo sapiens GN=AIFM1 PE=1 SV=1  
Beta-2-glycoprotein 1 OS=Homo sapiens GN=APOH PE=1 SV=3  
Alpha-1B-glycoprotein OS=Homo sapiens GN=A1BG PE=1 SV=4  
Dolichyl-diphosphooligosaccharide--protein glycosyltransferase subunit 2 OS=Homo  
Glucose-6-phosphate 1-dehydrogenase OS=Homo sapiens GN=G6PD PE=1 SV=4  
Cytochrome c oxidase subunit 4 isoform 1, mitochondrial OS=Homo sapiens GN=COX4I1  
Cytochrome c oxidase subunit 5A, mitochondrial OS=Homo sapiens GN=COX5A PE=1 SV=2  
Proteasome subunit alpha type-1 OS=Homo sapiens GN=PSMA1 PE=1 SV=1  
Flavin reductase (NADPH) OS=Homo sapiens GN=BLVRB PE=1 SV=3

ATP synthase subunit delta, mitochondrial OS=Homo sapiens GN=ATP5D PE=1 SV=2  
Cytochrome b-c1 complex subunit Rieske, mitochondrial OS=Homo sapiens GN=UQCRCFS1  
Serine--tRNA ligase, cytoplasmic OS=Homo sapiens GN=SARS PE=1 SV=3  
Glycine amidinotransferase, mitochondrial OS=Homo sapiens GN=GATM PE=1 SV=1  
Cluster of Alpha-actinin OS=Homo sapiens GN=ACTR1A PE=1 SV=1 (P61163)  
Interleukin enhancer-binding factor 2 OS=Homo sapiens GN=ILF2 PE=1 SV=2  
Delta(3,5)-Delta(2,4)-dienoyl-CoA isomerase, mitochondrial OS=Homo sapiens GN=ECH  
DNA damage-binding protein 1 OS=Homo sapiens GN=DDB1 PE=1 SV=1  
Cell adhesion molecule 2 OS=Homo sapiens GN=CADM2 PE=2 SV=1  
Gamma-soluble NSF attachment protein OS=Homo sapiens GN=NAPG PE=1 SV=1  
GTP:AMP phosphotransferase, mitochondrial OS=Homo sapiens GN=AK3 PE=1 SV=4  
RuvB-like 1 OS=Homo sapiens GN=RUVBL1 PE=1 SV=1  
SAM domain and HD domain-containing protein 1 OS=Homo sapiens GN=SAMHD1 PE=1 SV=2  
S-formylglutathione hydrolase OS=Homo sapiens GN=ESD PE=1 SV=2  
Alpha-2-HS-glycoprotein chain A OS=Homo sapiens GN=AHSG PE=4 SV=1  
Alpha-1-syntrophin OS=Homo sapiens GN=SNTA1 PE=1 SV=1  
26S protease regulatory subunit 8 OS=Homo sapiens GN=PSMC5 PE=2 SV=1  
HCG2002594, isoform CRA\_a OS=Homo sapiens GN=SEPT5 PE=2 SV=1  
Heterogeneous nuclear ribonucleoprotein D0 OS=Homo sapiens GN=HNRNPD PE=2 SV=1  
Coatomer protein complex, subunit beta 2 (Beta prime), isoform CRA\_b OS=Homo sapiens  
Cytochrome c (Fragment) OS=Homo sapiens GN=CYCS PE=3 SV=1  
Polyadenylate-binding protein 1 OS=Homo sapiens GN=PABPC1 PE=4 SV=1  
Xaa-Pro dipeptidase OS=Homo sapiens GN=PEPD PE=3 SV=1  
NADH dehydrogenase [ubiquinone] 1 alpha subcomplex subunit 8 OS=Homo sapiens GN=N  
Methyltransferase-like protein 7A (Fragment) OS=Homo sapiens GN=METTTL7A PE=4 SV=1  
Endoplasmic reticulum resident protein 29 OS=Homo sapiens GN=ERP29 PE=4 SV=1  
Peripheral plasma membrane protein CASK OS=Homo sapiens GN=CASK PE=4 SV=1  
ATP-dependent dihydroxyacetone kinase (Fragment) OS=Homo sapiens GN=DAK PE=4 SV=1  
NADH dehydrogenase [ubiquinone] iron-sulfur protein 2, mitochondrial OS=Homo sapiens  
Obg-like ATPase 1 OS=Homo sapiens GN=OLA1 PE=4 SV=1  
Cluster of Tyrosine-protein kinase Yes OS=Homo sapiens GN=YES1 PE=4 SV=1 (J3QRU1)  
Protein NipSnap homolog 2 OS=Homo sapiens GN=GBAS PE=1 SV=1  
NADH dehydrogenase [ubiquinone] iron-sulfur protein 6, mitochondrial OS=Homo sapiens  
Flotillin-1 OS=Homo sapiens GN=FLOT1 PE=1 SV=3  
Angiotensinogen OS=Homo sapiens GN=AGT PE=1 SV=1  
C4b-binding protein alpha chain OS=Homo sapiens GN=C4BPA PE=1 SV=2  
Cluster of 60S acidic ribosomal protein P2 OS=Homo sapiens GN=RPLP2 PE=1 SV=1 (P0  
Apolipoprotein A-IV OS=Homo sapiens GN=APOA4 PE=1 SV=3  
Clathrin light chain A OS=Homo sapiens GN=CLTA PE=1 SV=1  
Nidogen-1 OS=Homo sapiens GN=NID1 PE=1 SV=3  
Proteasome subunit beta type-1 OS=Homo sapiens GN=PSMB1 PE=1 SV=2  
Signal transducer and activator of transcription 1-alpha/beta OS=Homo sapiens GN=  
Lumican OS=Homo sapiens GN=LUM PE=1 SV=2  
Coatomer subunit beta OS=Homo sapiens GN=COPB1 PE=1 SV=3  
Exportin-2 OS=Homo sapiens GN=CSE1L PE=1 SV=3  
Hemoglobin subunit gamma-1 OS=Homo sapiens GN=HBG1 PE=1 SV=2  
Proteasome activator complex subunit 1 OS=Homo sapiens GN=PSME1 PE=1 SV=1

Serine/threonine-protein kinase PAK 2 OS=Homo sapiens GN=PAK2 PE=1 SV=3  
Isoform 2B of Cytoplasmic dynein 1 intermediate chain 2 OS=Homo sapiens GN=DYNC11  
Coactosin-like protein OS=Homo sapiens GN=COTL1 PE=1 SV=3  
Guanine nucleotide-binding protein subunit alpha-13 OS=Homo sapiens GN=GNA13 PE=1  
Protein phosphatase 1 regulatory subunit 7 OS=Homo sapiens GN=PPP1R7 PE=1 SV=1  
Guanine nucleotide-binding protein G(s) subunit alpha isoforms XLas OS=Homo sapie  
Hydroxysteroid dehydrogenase-like protein 2 OS=Homo sapiens GN=HSDL2 PE=1 SV=1  
Isoform 3 of Protein AHNAK2 OS=Homo sapiens GN=AHNAK2  
Ermin OS=Homo sapiens GN=ERMN PE=2 SV=1  
Cluster of Transportin-1 OS=Homo sapiens GN=TNP01 PE=1 SV=2 (Q92973)  
Vacuolar protein sorting-associated protein 35 OS=Homo sapiens GN=VPS35 PE=1 SV=2  
Beta-soluble NSF attachment protein OS=Homo sapiens GN=NAPB PE=1 SV=2  
Isoform 2 of Glyoxalase domain-containing protein 4 OS=Homo sapiens GN=GLOD4  
Electrogenic sodium bicarbonate cotransporter 1 OS=Homo sapiens GN=SLC4A4 PE=1 SV  
Prostaglandin reductase 1 OS=Homo sapiens GN=PTGR1 PE=1 SV=2  
Cluster of 40S ribosomal protein S15a OS=Homo sapiens GN=RPS15A PE=4 SV=1 (I3L3P7  
Matrin-3 OS=Homo sapiens GN=MATR3 PE=4 SV=1  
**Cluster of Fibulin 1 (Fragment) OS=Homo sapiens GN=FBLN1 PE=4 SV=1 (B1AHM9)**  
NAD(P)H dehydrogenase [quinone] 1 OS=Homo sapiens GN=NQ01 PE=2 SV=1  
Dynamin-like 120 kDa protein, mitochondrial OS=Homo sapiens GN=OPA1 PE=3 SV=1  
Transcription elongation factor B polypeptide 1 (Fragment) OS=Homo sapiens GN=TCE  
Catechol O-methyltransferase (Fragment) OS=Homo sapiens GN=COMT PE=4 SV=1  
Dystrophin OS=Homo sapiens GN=DMD PE=4 SV=1  
Microtubule-associated protein RP/EB family member 2 OS=Homo sapiens GN=MAPRE2 PE  
Copine-6 OS=Homo sapiens GN=CPNE6 PE=4 SV=1  
V-type proton ATPase 116 kDa subunit a isoform 1 OS=Homo sapiens GN=ATP6V0A1 PE=4  
Heat shock protein 75 kDa, mitochondrial OS=Homo sapiens GN=TRAP1 PE=3 SV=1  
Isoleucine--tRNA ligase, mitochondrial OS=Homo sapiens GN=IARS2 PE=3 SV=1  
Proteasome subunit alpha type OS=Homo sapiens GN=PSMA6 PE=3 SV=1  
Laminin subunit beta-1 OS=Homo sapiens GN=LAMB1 PE=4 SV=1  
Transforming growth factor-beta-induced protein ig-h3 OS=Homo sapiens GN=TGFBI PE  
Inositol monophosphatase 1 (Fragment) OS=Homo sapiens GN=IMPA1 PE=4 SV=1  
Isovaleryl Coenzyme A dehydrogenase, isoform CRA\_a OS=Homo sapiens GN=IVD PE=3 SV  
ATP-dependent RNA helicase DDX3X OS=Homo sapiens GN=DDX3X PE=1 SV=3  
Dihydropyrimidinase-related protein 4 OS=Homo sapiens GN=DPYSL4 PE=1 SV=2  
Heterogeneous nuclear ribonucleoprotein D-like OS=Homo sapiens GN=HNRPDL PE=1 SV=  
Plexin-B1 OS=Homo sapiens GN=PLXNB1 PE=1 SV=3  
Aflatoxin B1 aldehyde reductase member 2 OS=Homo sapiens GN=AKR7A2 PE=1 SV=3  
Cluster of Core histone macro-H2A.1 OS=Homo sapiens GN=H2AFY PE=1 SV=4 (075367)  
Cytosolic 10-formyltetrahydrofolate dehydrogenase OS=Homo sapiens GN=ALDH1L1 PE=1  
Apolipoprotein A-II OS=Homo sapiens GN=APOA2 PE=1 SV=1  
Integrin beta-1 OS=Homo sapiens GN=ITGB1 PE=1 SV=2  
Synaptophysin OS=Homo sapiens GN=SYP PE=1 SV=3  
Pyruvate dehydrogenase E1 component subunit alpha, somatic form, mitochondrial OS  
Collagen alpha-2(VI) chain OS=Homo sapiens GN=COL6A2 PE=1 SV=4  
V-type proton ATPase subunit C 1 OS=Homo sapiens GN=ATP6V1C1 PE=1 SV=4  
Cytoplasmic aconitate hydratase OS=Homo sapiens GN=ACO1 PE=1 SV=3

Cluster of NAD-dependent malic enzyme, mitochondrial OS=Homo sapiens GN=ME2 PE=1  
Laminin subunit alpha-1 OS=Homo sapiens GN=LAMA1 PE=1 SV=2  
Glycogen debranching enzyme OS=Homo sapiens GN=AGL PE=1 SV=3  
60S ribosomal protein L4 OS=Homo sapiens GN=RPL4 PE=1 SV=5  
Eukaryotic initiation factor 4A-III OS=Homo sapiens GN=EIF4A3 PE=1 SV=4  
Leucine-rich PPR motif-containing protein, mitochondrial OS=Homo sapiens GN=LRPPR  
60S ribosomal protein L5 OS=Homo sapiens GN=RPL5 PE=1 SV=3  
Serpine H1 OS=Homo sapiens GN=SERPINH1 PE=1 SV=2  
Isocitrate dehydrogenase [NAD] subunit gamma, mitochondrial OS=Homo sapiens GN=ID  
B-cell receptor-associated protein 31 OS=Homo sapiens GN=BCAP31 PE=1 SV=3  
Ribonuclease UK114 OS=Homo sapiens GN=HRSP12 PE=1 SV=1  
Succinyl-CoA ligase [ADP/GDP-forming] subunit alpha, mitochondrial OS=Homo sapien  
Voltage-dependent calcium channel subunit alpha-2/delta-1 OS=Homo sapiens GN=CACN  
Ras-related protein Rab-14 OS=Homo sapiens GN=RAB14 PE=1 SV=4  
Cluster of Serine/threonine-protein phosphatase PP1-beta catalytic subunit OS=Hom  
Single-stranded DNA-binding protein, mitochondrial OS=Homo sapiens GN=SSBP1 PE=1  
Cytoskeleton-associated protein 5 OS=Homo sapiens GN=CKAP5 PE=1 SV=3  
Inorganic pyrophosphatase OS=Homo sapiens GN=PPA1 PE=1 SV=2  
Protein NipSnap homolog 1 OS=Homo sapiens GN=NIPSNAP1 PE=1 SV=1  
Hyaluronan and proteoglycan link protein 2 OS=Homo sapiens GN=HAPLN2 PE=1 SV=1  
Cluster of Ethylmalonyl-CoA decarboxylase OS=Homo sapiens GN=ECHDC1 PE=1 SV=2 (Q9  
Endoplasmic reticulum aminopeptidase 1 OS=Homo sapiens GN=ERAP1 PE=1 SV=3  
Cluster of Microtubule-associated protein RP/EB family member 3 OS=Homo sapiens G  
Calpain-5 OS=Homo sapiens GN=CAPN5 PE=4 SV=2  
Mannose-6-phosphate isomerase OS=Homo sapiens GN=MPI PE=3 SV=1  
Cytochrome c oxidase subunit 2 OS=Homo sapiens GN=MT-CO2 PE=1 SV=1  
Plastin-2 OS=Homo sapiens GN=LCP1 PE=1 SV=6  
Oligodendrocyte-myelin glycoprotein OS=Homo sapiens GN=OMG PE=1 SV=2  
Receptor expression-enhancing protein 5 OS=Homo sapiens GN=REEP5 PE=1 SV=3  
Lin-7 homolog C (C. elegans), isoform CRA\_b OS=Homo sapiens GN=LIN7C PE=4 SV=1  
High mobility group protein B1 OS=Homo sapiens GN=HMGB1 PE=1 SV=3  
Translationally-controlled tumor protein OS=Homo sapiens GN=TPT1 PE=1 SV=1  
Rab3 GTPase-activating protein non-catalytic subunit OS=Homo sapiens GN=RAB3GAP2  
40S ribosomal protein S20 OS=Homo sapiens GN=RPS20 PE=1 SV=1  
Fumarylacetoacetate hydrolase domain-containing protein 2B OS=Homo sapiens GN=FAH  
Lysosome membrane protein 2 OS=Homo sapiens GN=SCARB2 PE=1 SV=2  
Monocarboxylate transporter 1 OS=Homo sapiens GN=SLC16A1 PE=1 SV=3  
Peptidyl-prolyl cis-trans isomerase-like 3 OS=Homo sapiens GN=PPIL3 PE=3 SV=1  
Ubiquitin-like modifier-activating enzyme 6 OS=Homo sapiens GN=UBA6 PE=1 SV=1  
Drebrin-like protein OS=Homo sapiens GN=DBNL PE=2 SV=1  
Macrophage-capping protein OS=Homo sapiens GN=CAPG PE=2 SV=1  
Purine nucleoside phosphorylase A OS=Homo sapiens GN=MTAP PE=2 SV=1  
Erythrocyte band 7 integral membrane protein OS=Homo sapiens GN=STOM PE=2 SV=1  
Acetyl-CoA acetyltransferase, cytosolic OS=Homo sapiens GN=ACAT2 PE=2 SV=1  
Aldehyde dehydrogenase, dimeric NADP-preferring (Fragment) OS=Homo sapiens GN=ALD  
Guanine nucleotide-binding protein subunit beta-2-like 1 OS=Homo sapiens GN=GNB2L  
Dihydrolipoyllysine-residue acetyltransferase component of pyruvate dehydrogenase



General vesicular transport factor p115 OS=Homo sapiens GN=USO1 PE=4 SV=1  
Cluster of Ras-related protein Rab-6A OS=Homo sapiens GN=RAB6A PE=3 SV=1 (F5H668)  
Proliferation-associated protein 2G4 OS=Homo sapiens GN=PA2G4 PE=4 SV=1  
Unconventional myosin-Va OS=Homo sapiens GN=MYO5A PE=4 SV=1  
X-prolyl aminopeptidase (Aminopeptidase P) 1, soluble, isoform CRA\_b OS=Homo sapiens GN=AMPEP1 PE=4 SV=1  
Cluster of Importin-5 (Fragment) OS=Homo sapiens GN=IPO5 PE=4 SV=1 (HOY8C6)  
Fatty acid-binding protein, epidermal OS=Homo sapiens GN=FABP5 PE=4 SV=1  
26S proteasome non-ATPase regulatory subunit 3 OS=Homo sapiens GN=PSMD3 PE=1 SV=2  
DnaJ homolog subfamily A member 2 OS=Homo sapiens GN=DNAJA2 PE=1 SV=1  
NADH dehydrogenase [ubiquinone] iron-sulfur protein 3, mitochondrial OS=Homo sapiens GN=ND3 PE=1 SV=1  
Isoform 2 of Nebulette OS=Homo sapiens GN=NEBL  
Purine nucleoside phosphorylase OS=Homo sapiens GN=PNP PE=1 SV=2  
Cystatin-C OS=Homo sapiens GN=CST3 PE=1 SV=1  
Alpha-1-acid glycoprotein 1 OS=Homo sapiens GN=ORM1 PE=1 SV=1  
Cytochrome c1, heme protein, mitochondrial OS=Homo sapiens GN=CYC1 PE=1 SV=3  
cAMP-dependent protein kinase type II-alpha regulatory subunit OS=Homo sapiens GN=PKRII PE=1 SV=1  
Gap junction alpha-1 protein OS=Homo sapiens GN=GJA1 PE=1 SV=2  
5'-nucleotidase OS=Homo sapiens GN=NT5E PE=1 SV=1  
Enoyl-CoA hydratase, mitochondrial OS=Homo sapiens GN=ECHS1 PE=1 SV=4  
Keratin, type I cytoskeletal 9 OS=Homo sapiens GN=KRT9 PE=1 SV=3  
Chitinase-3-like protein 1 OS=Homo sapiens GN=CHI3L1 PE=1 SV=2  
Acyl-coenzyme A thioesterase 2, mitochondrial OS=Homo sapiens GN=ACOT2 PE=1 SV=6  
Heterogeneous nuclear ribonucleoprotein F OS=Homo sapiens GN=HNRNPF PE=1 SV=3  
NEDD8-conjugating enzyme Ubc12 OS=Homo sapiens GN=UBE2M PE=1 SV=1  
Cluster of Transforming protein RhoA OS=Homo sapiens GN=RHOA PE=1 SV=1 (P61586)  
Dual specificity mitogen-activated protein kinase kinase 1 OS=Homo sapiens GN=MAP2K1 PE=1 SV=1  
Rho GTPase-activating protein 1 OS=Homo sapiens GN=ARHGAP1 PE=1 SV=1  
Leukocyte surface antigen CD47 OS=Homo sapiens GN=CD47 PE=1 SV=1  
EGF-containing fibulin-like extracellular matrix protein 1 OS=Homo sapiens GN=EFE1 PE=1 SV=1  
Transcription intermediary factor 1-beta OS=Homo sapiens GN=TRIM28 PE=1 SV=5  
Calcium/calmodulin-dependent protein kinase type II subunit beta OS=Homo sapiens GN=PKCII PE=1 SV=1  
Eukaryotic translation initiation factor 3 subunit A OS=Homo sapiens GN=EIF3A PE=1 SV=1  
RAB18, member RAS oncogene family OS=Homo sapiens GN=RAB18 PE=2 SV=1  
Isoform 2 of Choline transporter-like protein 2 OS=Homo sapiens GN=SLC44A2 PE=1 SV=1  
Far upstream element-binding protein 3 OS=Homo sapiens GN=FUBP3 PE=1 SV=2  
Extended synaptotagmin-1 OS=Homo sapiens GN=ESYT1 PE=1 SV=1  
Guanine nucleotide-binding protein subunit beta-4 OS=Homo sapiens GN=GNB4 PE=1 SV=1  
Heme-binding protein 1 OS=Homo sapiens GN=HEBP1 PE=1 SV=1  
Ribosome-binding protein 1 OS=Homo sapiens GN=RRBP1 PE=1 SV=4  
Alpha-aminoadipic semialdehyde synthase, mitochondrial OS=Homo sapiens GN=AASS PE=1 SV=1  
Cluster of Ubiquilin-2 OS=Homo sapiens GN=UBQLN2 PE=1 SV=2 (Q9UHD9)  
Pre-mRNA-processing factor 19 OS=Homo sapiens GN=PRPF19 PE=1 SV=1  
IgG Fc-binding protein OS=Homo sapiens GN=FCGBP PE=1 SV=3  
Clathrin light chain B OS=Homo sapiens GN=CLTB PE=1 SV=1  
Septin 10, isoform CRA\_c OS=Homo sapiens GN=SEPT10 PE=3 SV=2  
Electron transfer flavoprotein-ubiquinone oxidoreductase, mitochondrial OS=Homo sapiens GN=ETF1B PE=1 SV=1  
Shootin-1 OS=Homo sapiens GN=KIAA1598 PE=1 SV=4

Complement component C9 OS=Homo sapiens GN=C9 PE=1 SV=2  
Cathepsin B OS=Homo sapiens GN=CTSB PE=1 SV=3  
HCG2044799 OS=Homo sapiens GN=hCG\_2044799 PE=4 SV=1  
26S proteasome non-ATPase regulatory subunit 11 OS=Homo sapiens GN=PSMD11 PE=1 SV=1  
Prostaglandin E synthase 3 OS=Homo sapiens GN=PTGES3 PE=2 SV=1  
CD9 antigen OS=Homo sapiens GN=CD9 PE=4 SV=1  
Protein S100-A10 OS=Homo sapiens GN=S100A10 PE=1 SV=2  
Cysteine--tRNA ligase, cytoplasmic OS=Homo sapiens GN=CARS PE=2 SV=1  
Syntaxin 12 (Fragment) OS=Homo sapiens GN=STX12 PE=4 SV=1  
Protein kinase, cAMP-dependent, catalytic, beta OS=Homo sapiens GN=PRKACB PE=2 SV=1  
Non-specific lipid-transfer protein OS=Homo sapiens GN=SCP2 PE=2 SV=1  
ATP-dependent RNA helicase DDX19A OS=Homo sapiens GN=DDX19A PE=2 SV=1  
Activator of 90 kDa heat shock protein ATPase homolog 1 OS=Homo sapiens GN=AHSA1  
Eukaryotic translation initiation factor 3 subunit C OS=Homo sapiens GN=EIF3CL PE=1  
Delta-aminolevulinic acid dehydratase OS=Homo sapiens GN=ALAD PE=2 SV=1  
Cysteine-rich protein 2 OS=Homo sapiens GN=CRIP2 PE=2 SV=1  
3-ketoacyl-CoA thiolase, peroxisomal OS=Homo sapiens GN=ACAA1 PE=3 SV=1  
Coiled-coil-helix-coiled-coil-helix domain-containing protein 3, mitochondrial OS=Homo sapiens GN=EIF4G1 PE=4 SV=1  
Eukaryotic translation initiation factor 4 gamma 1 OS=Homo sapiens GN=EIF4G1 PE=4 SV=1  
Eukaryotic translation initiation factor 4 gamma 2 (Fragment) OS=Homo sapiens GN=EIF4G2 PE=4 SV=1  
Cluster of CLIP-associating protein 2 OS=Homo sapiens GN=CLASP2 PE=4 SV=2 (E3W994)  
Cluster of Kinesin light chain 1 OS=Homo sapiens GN=KLC1 PE=4 SV=1 (E7EVH7)  
Integrin alpha-V light chain OS=Homo sapiens GN=ITGAV PE=3 SV=1  
Protein arginine N-methyltransferase 1 OS=Homo sapiens GN=PRMT1 PE=4 SV=1  
TOM1-like protein 2 OS=Homo sapiens GN=TOM1L2 PE=4 SV=2  
SPARC (Fragment) OS=Homo sapiens GN=SPARC PE=4 SV=1  
Cysteine and glycine-rich protein 2 OS=Homo sapiens GN=CSRP2 PE=4 SV=1  
UPF0317 protein C14orf159, mitochondrial OS=Homo sapiens GN=C14orf159 PE=4 SV=1  
Sorting nexin-1 OS=Homo sapiens GN=SNX1 PE=4 SV=1  
Thiomorpholine-carboxylate dehydrogenase OS=Homo sapiens GN=CRYM PE=4 SV=1  
Eukaryotic peptide chain release factor GTP-binding subunit ERF3A OS=Homo sapiens GN=ERF3A PE=4 SV=1  
PDZ and LIM domain protein 1 OS=Homo sapiens GN=PDLIM1 PE=1 SV=4  
LanC-like protein 1 OS=Homo sapiens GN=LANCL1 PE=1 SV=1  
Sorting nexin-3 OS=Homo sapiens GN=SNX3 PE=1 SV=3  
Vesicle-trafficking protein SEC22b OS=Homo sapiens GN=SEC22B PE=1 SV=4  
Mitochondrial import receptor subunit TOM70 OS=Homo sapiens GN=TOMM70A PE=1 SV=1  
LETM1 and EF-hand domain-containing protein 1, mitochondrial OS=Homo sapiens GN=LETM1 PE=1 SV=1  
Alpha-2-antiplasmin OS=Homo sapiens GN=SERPINF2 PE=1 SV=3  
Hyaluronan and proteoglycan link protein 1 OS=Homo sapiens GN=HAPLN1 PE=2 SV=2  
40S ribosomal protein S2 OS=Homo sapiens GN=RPS2 PE=1 SV=2  
Histone H1.5 OS=Homo sapiens GN=HIST1H1B PE=1 SV=3  
Cluster of Ras-related protein Rab-3A OS=Homo sapiens GN=RAB3A PE=1 SV=1 (P20336)  
Succinate dehydrogenase [ubiquinone] iron-sulfur subunit, mitochondrial OS=Homo sapiens GN=SDHA PE=1 SV=1  
Proteasome subunit alpha type-3 OS=Homo sapiens GN=PSMA3 PE=1 SV=2  
Threonine--tRNA ligase, cytoplasmic OS=Homo sapiens GN=TARS PE=1 SV=3  
Proteasome subunit alpha type-5 OS=Homo sapiens GN=PSMA5 PE=1 SV=3  
60S ribosomal protein L12 OS=Homo sapiens GN=RPL12 PE=1 SV=1

Leukocyte elastase inhibitor OS=Homo sapiens GN=SERPINB1 PE=1 SV=1  
Adenylyl cyclase-associated protein 2 OS=Homo sapiens GN=CAP2 PE=1 SV=1  
Carnitine O-palmitoyltransferase 1, liver isoform OS=Homo sapiens GN=CPT1A PE=1 SV=1  
Biliverdin reductase A OS=Homo sapiens GN=BLVRA PE=1 SV=2  
26S protease regulatory subunit 4 OS=Homo sapiens GN=PSMC1 PE=1 SV=1  
Growth factor receptor-bound protein 2 OS=Homo sapiens GN=GRB2 PE=1 SV=1  
Contactin-associated protein 1 OS=Homo sapiens GN=CNTNAP1 PE=1 SV=1  
Transcriptional activator protein Pur-alpha OS=Homo sapiens GN=PURA PE=1 SV=2  
Transgelin OS=Homo sapiens GN=TAGLN PE=1 SV=4  
Peptidyl-prolyl cis-trans isomerase D OS=Homo sapiens GN=PPID PE=1 SV=3  
Heterogeneous nuclear ribonucleoprotein A0 OS=Homo sapiens GN=HNRNPA0 PE=1 SV=1  
Cluster of Rho-associated protein kinase 1 OS=Homo sapiens GN=ROCK1 PE=1 SV=1 (Q1  
Calcium/calmodulin-dependent protein kinase type II subunit gamma OS=Homo sapiens  
Beta-1-syntrophin OS=Homo sapiens GN=SNTB1 PE=1 SV=3  
Platelet-activating factor acetylhydrolase IB subunit gamma OS=Homo sapiens GN=PA  
Beta-synuclein OS=Homo sapiens GN=SNCB PE=1 SV=1  
Heterochromatin protein 1-binding protein 3 OS=Homo sapiens GN=HP1BP3 PE=1 SV=1  
Twinfilin-2 OS=Homo sapiens GN=TWF2 PE=1 SV=2  
Cell cycle exit and neuronal differentiation protein 1 OS=Homo sapiens GN=CEND1 P  
Saccharopine dehydrogenase-like oxidoreductase OS=Homo sapiens GN=SCCPDH PE=1 SV=  
NAD(P)H-hydrate epimerase OS=Homo sapiens GN=APOA1BP PE=1 SV=2  
Cell adhesion molecule 4 OS=Homo sapiens GN=CADM4 PE=1 SV=1  
BTB/POZ domain-containing protein KCTD12 OS=Homo sapiens GN=KCTD12 PE=1 SV=1  
CB1 cannabinoid receptor-interacting protein 1 OS=Homo sapiens GN=CNRI1 PE=1 SV=  
Phytanoyl-CoA hydroxylase-interacting protein-like OS=Homo sapiens GN=PHYHIPL PE=  
Phosphoglucomutase-2 OS=Homo sapiens GN=PGM2 PE=1 SV=4  
Tubulin-folding cofactor B OS=Homo sapiens GN=TBCB PE=1 SV=2  
Proteasome subunit beta type-7 OS=Homo sapiens GN=PSMB7 PE=1 SV=1  
Redox-regulatory protein FAM213A OS=Homo sapiens GN=FAM213A PE=1 SV=3  
Transmembrane protein 43 OS=Homo sapiens GN=TMEM43 PE=1 SV=1  
Mitochondrial glutamate carrier 1 OS=Homo sapiens GN=SLC25A22 PE=1 SV=1  
Methylcrotonoyl-CoA carboxylase beta chain, mitochondrial OS=Homo sapiens GN=MCCC  
Isoform 2 of ATPase family AAA domain-containing protein 3A OS=Homo sapiens GN=AT  
LIM and cysteine-rich domains protein 1 OS=Homo sapiens GN=LMCD1 PE=1 SV=1  
Vesicle-associated membrane protein-associated protein A OS=Homo sapiens GN=VAPA  
NADH-cytochrome b5 reductase 1 OS=Homo sapiens GN=CYB5R1 PE=1 SV=1  
Lambda-crystallin homolog OS=Homo sapiens GN=CRYL1 PE=1 SV=3  
Cytochrome b-c1 complex subunit 7 OS=Homo sapiens GN=UQCRB PE=2 SV=1  
Lupus La protein OS=Homo sapiens GN=SSB PE=4 SV=1  
NADH dehydrogenase [ubiquinone] iron-sulfur protein 8, mitochondrial (Fragment) O  
Transthyretin OS=Homo sapiens GN=TTR PE=1 SV=1  
Cluster of 6-phosphofructo-2-kinase/fructose-2, 6-bisphosphatase 2 transcript var  
Thioredoxin domain-containing protein 12 OS=Homo sapiens GN=TXNDC12 PE=1 SV=1  
Glycogenin-1 OS=Homo sapiens GN=GYG1 PE=1 SV=4  
Histamine N-methyltransferase OS=Homo sapiens GN=HNMT PE=1 SV=1  
Fermitin family homolog 2 (Fragment) OS=Homo sapiens GN=FERMT2 PE=4 SV=1  
Histidine triad nucleotide-binding protein 1 OS=Homo sapiens GN=HINT1 PE=1 SV=2

Tripeptidyl-peptidase 1 OS=Homo sapiens GN=TPP1 PE=1 SV=2  
Ubiquitin-like protein ISG15 OS=Homo sapiens GN=ISG15 PE=1 SV=5  
60S ribosomal protein L23a OS=Homo sapiens GN=RPL23A PE=3 SV=1  
Heterogeneous nuclear ribonucleoprotein A/B OS=Homo sapiens GN=HNRNPAB PE=4 SV=1  
Programmed cell death protein 6 OS=Homo sapiens GN=PDCD6 PE=1 SV=1  
26S proteasome non-ATPase regulatory subunit 14 OS=Homo sapiens GN=PSMD14 PE=1 SV=1  
Dynein light chain 1, cytoplasmic OS=Homo sapiens GN=DYNLL1 PE=1 SV=1  
Calpain small subunit 1 OS=Homo sapiens GN=CAPNS1 PE=1 SV=1  
Guanine nucleotide-binding protein G(I)/G(S)/G(O) subunit gamma-7 OS=Homo sapiens  
SH3 domain binding glutamic acid-rich protein like 3 OS=Homo sapiens GN=SH3BGRL3  
AP-3 complex subunit delta-1 OS=Homo sapiens GN=AP3D1 PE=4 SV=1  
Nucleosome assembly protein 1-like 4 (Fragment) OS=Homo sapiens GN=NAP1L4 PE=3 SV=1  
Archain 1, isoform CRA\_a OS=Homo sapiens GN=ARCN1 PE=4 SV=1  
Cluster of Histidine--tRNA ligase, cytoplasmic OS=Homo sapiens GN=HARS PE=2 SV=1  
Sorting nexin-2 OS=Homo sapiens GN=SNX2 PE=2 SV=1  
Solute carrier family 25 (Mitochondrial carrier; citrate transporter), member 1,  
ELAV-like protein 1 OS=Homo sapiens GN=ELAVL1 PE=2 SV=1  
Plasma protease C1 inhibitor OS=Homo sapiens GN=SERPING1 PE=2 SV=1  
Stomatin-like protein 2 OS=Homo sapiens GN=STOML2 PE=2 SV=1  
Ubiquitin carboxyl-terminal hydrolase OS=Homo sapiens GN=USP7 PE=2 SV=1  
Propionyl-CoA carboxylase beta chain, mitochondrial OS=Homo sapiens GN=PCCB PE=4  
Catenin delta-2 OS=Homo sapiens GN=CTNND2 PE=4 SV=1  
Heat shock 70 kDa protein 4L OS=Homo sapiens GN=HSPA4L PE=3 SV=2  
Acylglycerol kinase, mitochondrial OS=Homo sapiens GN=AGK PE=4 SV=1  
AP-2 complex subunit mu OS=Homo sapiens GN=AP2M1 PE=4 SV=1  
Pyridoxal kinase OS=Homo sapiens GN=PDXK PE=4 SV=1  
Doublecortin and CaM kinase-like 2, isoform CRA\_c OS=Homo sapiens GN=DCLK2 PE=4 S  
Heme oxygenase 2 OS=Homo sapiens GN=HMOX2 PE=4 SV=1  
Cytochrome c oxidase subunit 6B1 OS=Homo sapiens GN=COX6B1 PE=4 SV=1  
Serine/arginine-rich-splicing factor 1 OS=Homo sapiens GN=SRSF1 PE=4 SV=1  
Chloride intracellular channel protein 1 OS=Homo sapiens GN=CLIC1 PE=1 SV=4  
Plexin-B2 OS=Homo sapiens GN=PLXNB2 PE=1 SV=3  
Syntaxin-7 OS=Homo sapiens GN=STX7 PE=1 SV=4  
Actin-related protein 2/3 complex subunit 5 OS=Homo sapiens GN=ARPC5 PE=1 SV=3  
Isocitrate dehydrogenase [NAD] subunit beta, mitochondrial OS=Homo sapiens GN=IDH  
Periplakin OS=Homo sapiens GN=PPL PE=1 SV=4  
Enoyl-CoA delta isomerase 2, mitochondrial OS=Homo sapiens GN=ECI2 PE=1 SV=4  
U5 small nuclear ribonucleoprotein 200 kDa helicase OS=Homo sapiens GN=SNRNP200 P  
ATP synthase subunit g, mitochondrial OS=Homo sapiens GN=ATP5L PE=1 SV=3  
SEC14-like protein 2 OS=Homo sapiens GN=SEC14L2 PE=1 SV=1  
Endonuclease domain-containing 1 protein OS=Homo sapiens GN=ENDOD1 PE=1 SV=2  
Collagen alpha-1(IV) chain OS=Homo sapiens GN=COL4A1 PE=1 SV=3  
60S ribosomal protein L7 OS=Homo sapiens GN=RPL7 PE=1 SV=1  
Keratin, type II cytoskeletal 2 epidermal OS=Homo sapiens GN=KRT2 PE=1 SV=2  
Pigment epithelium-derived factor OS=Homo sapiens GN=SERPINF1 PE=1 SV=4  
Glutamate--cysteine ligase catalytic subunit OS=Homo sapiens GN=GCLC PE=1 SV=2  
Activated RNA polymerase II transcriptional coactivator p15 OS=Homo sapiens GN=SU

Epiplakin OS=Homo sapiens GN=EPPK1 PE=1 SV=2  
Cluster of Liprin-alpha-1 OS=Homo sapiens GN=PPFIA1 PE=1 SV=1 (Q13136)  
Nidogen-2 OS=Homo sapiens GN=NID2 PE=1 SV=3  
Dystroglycan OS=Homo sapiens GN=DAG1 PE=1 SV=2  
LIM and SH3 domain protein 1 OS=Homo sapiens GN=LASP1 PE=1 SV=2  
Lysine--tRNA ligase OS=Homo sapiens GN=KARS PE=1 SV=3  
Coiled-coil domain-containing protein 6 OS=Homo sapiens GN=CCDC6 PE=1 SV=2  
GRIP1-associated protein 1 OS=Homo sapiens GN=GRIPAP1 PE=1 SV=1  
Glucose 1,6-bisphosphate synthase OS=Homo sapiens GN=PGM2L1 PE=1 SV=3  
Cluster of DBIRD complex subunit KIAA1967 OS=Homo sapiens GN=KIAA1967 PE=1 SV=2 (Actin-related protein 2/3 complex subunit 1A OS=Homo sapiens GN=ARPC1A PE=1 SV=2  
26S proteasome non-ATPase regulatory subunit 1 OS=Homo sapiens GN=PSMD1 PE=1 SV=2  
UBX domain-containing protein 6 OS=Homo sapiens GN=UBXN6 PE=1 SV=1  
Prenylcysteine oxidase 1 OS=Homo sapiens GN=PCYOX1 PE=1 SV=3  
Enolase-phosphatase E1 OS=Homo sapiens GN=ENOPH1 PE=1 SV=1  
Transgelin-3 OS=Homo sapiens GN=TAGLN3 PE=1 SV=2  
F-box only protein 2 OS=Homo sapiens GN=FBXO2 PE=1 SV=2  
Cluster of Probable phospholipid-transporting ATPase IA OS=Homo sapiens GN=ATP8A1  
Peptidyl-prolyl cis-trans isomerase-like 1 OS=Homo sapiens GN=PPIL1 PE=1 SV=1  
Sorting nexin-5 OS=Homo sapiens GN=SNX5 PE=1 SV=1  
Laminin subunit gamma-3 OS=Homo sapiens GN=LAMC3 PE=1 SV=3  
Amphiphysin OS=Homo sapiens GN=AMPH PE=4 SV=1  
Complement C1r subcomponent OS=Homo sapiens GN=C1R PE=3 SV=1  
Vesicle-associated membrane protein-associated protein B/C OS=Homo sapiens GN=VAP  
Collagen alpha-1(XVIII) chain OS=Homo sapiens GN=COL18A1 PE=1 SV=5  
Dystrobrevin alpha OS=Homo sapiens GN=DTNA PE=2 SV=1  
Guanine nucleotide-binding protein subunit gamma OS=Homo sapiens GN=GNG2 PE=3 SV=3  
Membrane-associated progesterone receptor component 1 OS=Homo sapiens GN=PGRMC1 P  
Sialic acid synthase OS=Homo sapiens GN=NANS PE=1 SV=2  
40S ribosomal protein S6 OS=Homo sapiens GN=RPS6 PE=1 SV=1  
Cluster of Serine/arginine-rich splicing factor 4 OS=Homo sapiens GN=SRSF4 PE=1 S  
Heterogeneous nuclear ribonucleoprotein H3 OS=Homo sapiens GN=HNRNPH3 PE=1 SV=2  
Translin OS=Homo sapiens GN=TSN PE=4 SV=1  
Calumenin OS=Homo sapiens GN=CALU PE=1 SV=2  
Galectin-3-binding protein OS=Homo sapiens GN=LGALS3BP PE=1 SV=1  
S-adenosylmethionine synthase isoform type-2 OS=Homo sapiens GN=MAT2A PE=1 SV=1  
Glycine--tRNA ligase OS=Homo sapiens GN=GARS PE=1 SV=3  
Protein phosphatase methylesterase 1 OS=Homo sapiens GN=PPME1 PE=3 SV=1  
Neutral amino acid transporter A OS=Homo sapiens GN=SLC1A4 PE=1 SV=1  
Oxysterol-binding protein 1 OS=Homo sapiens GN=OSBP PE=1 SV=1  
Rho-related GTP-binding protein RhoB OS=Homo sapiens GN=RHOB PE=1 SV=1  
Hydroxymethylglutaryl-CoA synthase, cytoplasmic OS=Homo sapiens GN=HMGCS1 PE=1 SV=1  
Microsomal glutathione S-transferase 1 OS=Homo sapiens GN=MGST1 PE=1 SV=1  
Malectin (Fragment) OS=Homo sapiens GN=MLEC PE=4 SV=1  
Peptidyl-prolyl cis-trans isomerase FKBP1A OS=Homo sapiens GN=FKBP1A PE=1 SV=2  
Rho GDP-dissociation inhibitor 2 (Fragment) OS=Homo sapiens GN=ARHGDI2 PE=4 SV=1  
Protein transport protein Sec24C OS=Homo sapiens GN=SEC24C PE=4 SV=2

Guanine nucleotide-binding protein G(z) subunit alpha OS=Homo sapiens GN=GNAZ PE=15 kDa selenoprotein OS=Homo sapiens GN=SEP15 PE=1 SV=3  
SH3 domain-binding glutamic acid-rich-like protein OS=Homo sapiens GN=SH3BGRL PE=Microtubule-associated protein 6 OS=Homo sapiens GN=MAP6 PE=1 SV=2  
Histidine triad nucleotide-binding protein 2, mitochondrial OS=Homo sapiens GN=HI  
Estradiol 17-beta-dehydrogenase 12 OS=Homo sapiens GN=HSD17B12 PE=1 SV=2  
Ubiquitin-conjugating enzyme E2 L3 OS=Homo sapiens GN=UBE2L3 PE=1 SV=1  
Integrin alpha-M OS=Homo sapiens GN=ITGAM PE=1 SV=2  
Synaptojanin-2-binding protein OS=Homo sapiens GN=SYNJ2BP PE=1 SV=2  
Transmembrane emp24 domain-containing protein 9 OS=Homo sapiens GN=TMED9 PE=1 SV=40S ribosomal protein S27 OS=Homo sapiens GN=RPS27L PE=3 SV=1  
Cluster of Cyclin-dependent kinase 5 OS=Homo sapiens GN=CDK5 PE=1 SV=3 (Q00535)  
Vigilin OS=Homo sapiens GN=HDLBP PE=1 SV=2  
Beta-2-microglobulin form pI 5.3 OS=Homo sapiens GN=B2M PE=3 SV=1  
TRAF2 and NCK-interacting protein kinase OS=Homo sapiens GN=TNIK PE=4 SV=1  
Acidic leucine-rich nuclear phosphoprotein 32 family member B OS=Homo sapiens GN=RELA protein OS=Homo sapiens GN=RELA PE=2 SV=1  
Cyclin-Y OS=Homo sapiens GN=CCNY PE=2 SV=1  
Zinc-alpha-2-glycoprotein OS=Homo sapiens GN=AZGP1 PE=3 SV=1  
Breast carcinoma-amplified sequence 1 OS=Homo sapiens GN=BCAS1 PE=2 SV=1  
2-oxoisovalerate dehydrogenase subunit alpha, mitochondrial OS=Homo sapiens GN=BC  
Cold-inducible RNA-binding protein OS=Homo sapiens GN=CIRBP PE=2 SV=1  
Glutathione synthetase OS=Homo sapiens GN=GSS PE=2 SV=1  
60S ribosomal protein L23 (Fragment) OS=Homo sapiens GN=RPL23 PE=3 SV=1  
Synaptojanin-1 OS=Homo sapiens GN=SYNJ1 PE=4 SV=1  
Thymidine phosphorylase (Fragment) OS=Homo sapiens GN=TYMP PE=4 SV=1  
Annexin OS=Homo sapiens GN=ANXA3 PE=3 SV=1  
Tubulin-specific chaperone A OS=Homo sapiens GN=TBCA PE=4 SV=1  
MAGUK p55 subfamily member 2 OS=Homo sapiens GN=MPP2 PE=4 SV=1  
Interferon-induced, double-stranded RNA-activated protein kinase OS=Homo sapiens  
CD82 antigen (Fragment) OS=Homo sapiens GN=CD82 PE=4 SV=1  
Tight junction protein ZO-2 OS=Homo sapiens GN=TJP2 PE=4 SV=1  
Limbic system-associated membrane protein OS=Homo sapiens GN=LSAMP PE=4 SV=1  
Active breakpoint cluster region-related protein OS=Homo sapiens GN=ABR PE=4 SV=1  
Dynamin-1-like protein OS=Homo sapiens GN=DNM1L PE=3 SV=1  
E3 ubiquitin-protein ligase HUWE1 (Fragment) OS=Homo sapiens GN=HUWE1 PE=4 SV=1  
NSFL1 cofactor p47 OS=Homo sapiens GN=NSFL1C PE=4 SV=1  
Synaptosomal-associated protein 23 OS=Homo sapiens GN=SNAP23 PE=1 SV=1  
Exportin-T OS=Homo sapiens GN=XPOT PE=1 SV=2  
ATPase ASNA1 OS=Homo sapiens GN=ASNA1 PE=1 SV=2  
PC4 and SFRS1-interacting protein OS=Homo sapiens GN=PSIP1 PE=1 SV=1  
Heat shock factor-binding protein 1 OS=Homo sapiens GN=HSBP1 PE=1 SV=1  
Interferon-inducible double stranded RNA-dependent protein kinase activator A OS=  
Kelch repeat and BTB domain-containing protein 11 OS=Homo sapiens GN=KBTBD11 PE=1  
Complement C1q subcomponent subunit C OS=Homo sapiens GN=C1QC PE=1 SV=3  
Carnitine O-palmitoyltransferase 2, mitochondrial OS=Homo sapiens GN=CPT2 PE=1 SV  
Adenylate kinase isoenzyme 4, mitochondrial OS=Homo sapiens GN=AK4 PE=1 SV=1

3-hydroxyisobutyrate dehydrogenase, mitochondrial OS=Homo sapiens GN=HIBADH PE=1  
Serine hydroxymethyltransferase, mitochondrial OS=Homo sapiens GN=SHMT2 PE=1 SV=3  
Cluster of Ran GTPase-activating protein 1 OS=Homo sapiens GN=RANGAP1 PE=1 SV=1 ( Glutamine--tRNA ligase OS=Homo sapiens GN=QARS PE=1 SV=1  
Eukaryotic translation initiation factor 5 OS=Homo sapiens GN=EIF5 PE=1 SV=2  
40S ribosomal protein S8 OS=Homo sapiens GN=RPS8 PE=1 SV=2  
60S ribosomal protein L31 OS=Homo sapiens GN=RPL31 PE=1 SV=1  
Nuclease-sensitive element-binding protein 1 OS=Homo sapiens GN=YBX1 PE=1 SV=3  
Twinfilin-1 OS=Homo sapiens GN=TWF1 PE=1 SV=3  
Aminoacyl tRNA synthase complex-interacting multifunctional protein 1 OS=Homo sap  
Peptidyl-prolyl cis-trans isomerase NIMA-interacting 1 OS=Homo sapiens GN=PIN1 PE  
Thiosulfate sulfurtransferase OS=Homo sapiens GN=TST PE=1 SV=4  
NAD kinase domain-containing protein 1 OS=Homo sapiens GN=NADKD1 PE=1 SV=2  
Ectonucleotide pyrophosphatase/phosphodiesterase family member 6 OS=Homo sapiens  
Leucine-rich repeat-containing protein 47 OS=Homo sapiens GN=LRRC47 PE=1 SV=1  
Phosphatidylinositol 3,4,5-trisphosphate-dependent Rac exchanger 1 protein OS=Hom  
Glucosamine-6-phosphate isomerase 2 OS=Homo sapiens GN=GNPDA2 PE=1 SV=1  
Choline transporter-like protein 1 OS=Homo sapiens GN=SLC44A1 PE=1 SV=1  
Optineurin OS=Homo sapiens GN=OPTN PE=1 SV=2  
PDZ and LIM domain protein 5 OS=Homo sapiens GN=PDLIM5 PE=1 SV=5  
COP9 signalosome complex subunit 4 OS=Homo sapiens GN=COPS4 PE=1 SV=1  
Toll-interacting protein OS=Homo sapiens GN=TOLLIP PE=1 SV=1  
Protein FAM49B OS=Homo sapiens GN=FAM49B PE=1 SV=1  
26S proteasome non-ATPase regulatory subunit 13 OS=Homo sapiens GN=PSMD13 PE=1 SV  
Cluster of Serine/threonine-protein kinase MRCK beta OS=Homo sapiens GN=CDC42BPB  
Importin subunit alpha-1 (Fragment) OS=Homo sapiens GN=KPNA1 PE=4 SV=1  
Protein KIAA0368 OS=Homo sapiens GN=KIAA0368 PE=4 SV=1  
Tumor protein D54 OS=Homo sapiens GN=TPD52L2 PE=1 SV=2  
Lysosomal alpha-glucosidase OS=Homo sapiens GN=GAA PE=1 SV=4  
Nucleoprotein TPR OS=Homo sapiens GN=TPR PE=1 SV=3  
Ran-specific GTPase-activating protein OS=Homo sapiens GN=RANBP1 PE=1 SV=1  
40S ribosomal protein S10 OS=Homo sapiens GN=RPS10 PE=1 SV=1  
Serine/threonine-protein kinase PAK 1 OS=Homo sapiens GN=PAK1 PE=1 SV=2  
Metalloproteinase inhibitor 3 OS=Homo sapiens GN=TIMP3 PE=4 SV=1  
C-terminal-binding protein 1 (Fragment) OS=Homo sapiens GN=CTBP1 PE=3 SV=1  
Thioredoxin-like protein 1 OS=Homo sapiens GN=TXNL1 PE=1 SV=3  
Proteasome subunit alpha type-2 OS=Homo sapiens GN=PSMA2 PE=1 SV=2  
Phosphatidylinositol transfer protein alpha isoform OS=Homo sapiens GN=PITPNA PE=  
Isobutyryl-CoA dehydrogenase, mitochondrial OS=Homo sapiens GN=ACAD8 PE=1 SV=1  
UMP-CMP kinase OS=Homo sapiens GN=CMPK1 PE=3 SV=1  
Glia maturation factor beta OS=Homo sapiens GN=GMFB PE=1 SV=2  
Crk-like protein OS=Homo sapiens GN=CRKL PE=1 SV=1  
NADPH:adrenodoxin oxidoreductase, mitochondrial OS=Homo sapiens GN=FDXR PE=2 SV=1  
Rho-related GTP-binding protein RhoG OS=Homo sapiens GN=RHOG PE=1 SV=1  
L-asparaginase OS=Homo sapiens GN=ASRGL1 PE=1 SV=2  
Protein quaking (Fragment) OS=Homo sapiens GN=QKI PE=4 SV=1  
Prostaglandin-H2 D-isomerase OS=Homo sapiens GN=PTGDS PE=3 SV=1

Carboxymethylenebutenolidase homolog OS=Homo sapiens GN=CMBL PE=1 SV=1  
Phosphoribosyl pyrophosphate synthase-associated protein 2 OS=Homo sapiens GN=PRP  
Protein XRP2 OS=Homo sapiens GN=RP2 PE=1 SV=4  
IST1 homolog OS=Homo sapiens GN=IST1 PE=2 SV=1  
Cluster of HCG2044781 OS=Homo sapiens GN=TMEM189 PE=4 SV=1 (G3V2F7)  
Integrin beta-2 OS=Homo sapiens GN=ITGB2 PE=1 SV=2  
SRC kinase-signaling inhibitor 1 (Fragment) OS=Homo sapiens GN=SRCIN1 PE=4 SV=2  
Charged multivesicular body protein 5 OS=Homo sapiens GN=CHMP5 PE=1 SV=1  
Isoform 3 of Neurochondrin OS=Homo sapiens GN=NCDN  
Ribosome maturation protein SBDS OS=Homo sapiens GN=SBDS PE=1 SV=4  
Cluster of Calretinin (Fragment) OS=Homo sapiens GN=CALB2 PE=4 SV=2 (H3BN14)  
COP9 signalosome complex subunit 6 OS=Homo sapiens GN=COPS6 PE=4 SV=1  
Protein S100-A11 OS=Homo sapiens GN=S100A11 PE=1 SV=2  
Isoform 2 of Sorting nexin-18 OS=Homo sapiens GN=SNX18  
40S ribosomal protein S4, X isoform OS=Homo sapiens GN=RPS4X PE=1 SV=2  
GTP-binding protein SAR1a OS=Homo sapiens GN=SAR1A PE=1 SV=1  
Peflin OS=Homo sapiens GN=PEF1 PE=1 SV=1  
HCG37564, isoform CRA\_c OS=Homo sapiens GN=TIRAP3 PE=2 SV=1  
Visinin-like protein 1 (Fragment) OS=Homo sapiens GN=VSNL1 PE=4 SV=1  
Cluster of Eukaryotic translation initiation factor 2 subunit 1 OS=Homo sapiens G  
von Willebrand factor A domain-containing protein 5A OS=Homo sapiens GN=VWA5A PE=  
Phospholysine phosphohistidine inorganic pyrophosphate phosphatase OS=Homo sapien  
Peptidyl-prolyl cis-trans isomerase F, mitochondrial OS=Homo sapiens GN=PPIF PE=1  
Histidine-rich glycoprotein OS=Homo sapiens GN=HRG PE=1 SV=1  
Decorin OS=Homo sapiens GN=DCN PE=1 SV=1  
Ras-related protein Rap-2b OS=Homo sapiens GN=RAP2B PE=1 SV=1  
Cadherin-13 OS=Homo sapiens GN=CDH13 PE=2 SV=1  
Prostate leucine zipper variant 2 OS=Homo sapiens GN=TPD52 PE=2 SV=2  
Proline synthase co-transcribed bacterial homolog protein (Fragment) OS=Homo sapi  
Dickkopf-related protein 3 OS=Homo sapiens GN=DKK3 PE=4 SV=2  
Glycolipid transfer protein OS=Homo sapiens GN=GLTP PE=4 SV=1  
Enoyl-CoA delta isomerase 1, mitochondrial (Fragment) OS=Homo sapiens GN=ECI1 PE=  
Proteasome subunit beta type-10 (Fragment) OS=Homo sapiens GN=PSMB10 PE=4 SV=1  
Glia maturation factor gamma OS=Homo sapiens GN=GMFG PE=1 SV=1  
Protein ETHE1, mitochondrial OS=Homo sapiens GN=ETHE1 PE=1 SV=2  
Basic leucine zipper and W2 domain-containing protein 1 OS=Homo sapiens GN=BZW1 P  
Retinal dehydrogenase 1 OS=Homo sapiens GN=ALDH1A1 PE=1 SV=2  
26S proteasome non-ATPase regulatory subunit 12 OS=Homo sapiens GN=PSMD12 PE=1 SV  
DnaJ homolog subfamily B member 1 OS=Homo sapiens GN=DNAJB1 PE=2 SV=1  
Alpha-2-macroglobulin receptor-associated protein OS=Homo sapiens GN=LRPAP1 PE=1  
Syntaxin-1A OS=Homo sapiens GN=STX1A PE=4 SV=1  
Constitutive coactivator of PPAR-gamma-like protein 1 OS=Homo sapiens GN=FAM120A  
CD59 glycoprotein OS=Homo sapiens GN=CD59 PE=4 SV=1  
Neuronal membrane glycoprotein M6-b OS=Homo sapiens GN=GPM6B PE=1 SV=2  
Acidic leucine-rich nuclear phosphoprotein 32 family member A OS=Homo sapiens GN=  
Phosphatidylinositol 4-phosphate 5-kinase type-1 gamma OS=Homo sapiens GN=PIP5K1C  
Actin-related protein 2/3 complex subunit 3 OS=Homo sapiens GN=ARPC3 PE=1 SV=3



Vesicular glutamate transporter 1 OS=Homo sapiens GN=SLC17A7 PE=2 SV=1  
WD40 repeat-containing protein SMU1 OS=Homo sapiens GN=SMU1 PE=1 SV=2  
Hsp90 co-chaperone Cdc37 OS=Homo sapiens GN=CDC37 PE=1 SV=1  
Protein FAM162A OS=Homo sapiens GN=FAM162A PE=4 SV=1  
Protein PRRC2A OS=Homo sapiens GN=PRRC2A PE=4 SV=1  
Sterol-4-alpha-carboxylate 3-dehydrogenase, decarboxylating (Fragment) OS=Homo sa  
Cytochrome c oxidase subunit 7A2, mitochondrial (Fragment) OS=Homo sapiens GN=COX  
Malonyl-CoA decarboxylase, mitochondrial OS=Homo sapiens GN=MLYCD PE=1 SV=3  
Ubiquitin carboxyl-terminal hydrolase OS=Homo sapiens GN=USP14 PE=3 SV=2  
Copine I OS=Homo sapiens GN=CPNE1 PE=4 SV=1  
Eukaryotic translation initiation factor 3 subunit H OS=Homo sapiens GN=EIF3H PE=  
Sorting nexin 6, isoform CRA\_e OS=Homo sapiens GN=SNX6 PE=2 SV=1  
Protein transport protein Sec31A OS=Homo sapiens GN=SEC31A PE=2 SV=1  
RNA-binding protein 39 OS=Homo sapiens GN=RBM39 PE=4 SV=1  
Farnesyl pyrophosphate synthase OS=Homo sapiens GN=FDPS PE=3 SV=1  
Acidic leucine-rich nuclear phosphoprotein 32 family member E (Fragment) OS=Homo  
COP9 signalosome complex subunit 7a (Fragment) OS=Homo sapiens GN=COPS7A PE=4 SV=  
CADM1 protein OS=Homo sapiens GN=CADM1 PE=2 SV=1  
Protein canopy homolog 2 (Fragment) OS=Homo sapiens GN=CNPY2 PE=4 SV=1  
DNA-(apurinic or apyrimidinic site) lyase (Fragment) OS=Homo sapiens GN=APEX1 PE=  
Lipid phosphate phosphohydrolase 3 OS=Homo sapiens GN=PPAP2B PE=1 SV=1  
Serine/threonine-protein kinase DCLK1 OS=Homo sapiens GN=DCLK1 PE=1 SV=2  
Small glutamine-rich tetratricopeptide repeat-containing protein alpha OS=Homo sa  
N-acetylserotonin O-methyltransferase-like protein OS=Homo sapiens GN=ASMTL PE=1  
NADH dehydrogenase [ubiquinone] 1 beta subcomplex subunit 10 OS=Homo sapiens GN=N  
Cluster of HLA class II histocompatibility antigen, DRB1-11 beta chain OS=Homo sa  
Methylmalonyl-CoA mutase, mitochondrial OS=Homo sapiens GN=MUT PE=1 SV=4  
Splicing factor U2AF 65 kDa subunit OS=Homo sapiens GN=U2AF2 PE=1 SV=4  
Adenylosuccinate synthetase isozyme 2 OS=Homo sapiens GN=ADSS PE=1 SV=3  
NADP-dependent malic enzyme OS=Homo sapiens GN=ME1 PE=1 SV=1  
Hepatoma-derived growth factor OS=Homo sapiens GN=HDGF PE=1 SV=1  
Coatomer subunit alpha OS=Homo sapiens GN=COPA PE=1 SV=2  
26S protease regulatory subunit 10B OS=Homo sapiens GN=PSMC6 PE=1 SV=1  
Tyrosine-protein phosphatase non-receptor type 11 OS=Homo sapiens GN=PTPN11 PE=1  
Ras-related protein Rab-31 OS=Homo sapiens GN=RAB31 PE=1 SV=1  
Protein prune homolog OS=Homo sapiens GN=PRUNE PE=1 SV=2  
NEDD8-activating enzyme E1 catalytic subunit OS=Homo sapiens GN=UBA3 PE=1 SV=2  
5' (3')-deoxyribonucleotidase, cytosolic type OS=Homo sapiens GN=NT5C PE=1 SV=2  
COP9 signalosome complex subunit 5 OS=Homo sapiens GN=COPS5 PE=1 SV=4  
Fructosamine-3-kinase OS=Homo sapiens GN=FN3K PE=1 SV=1  
Histidine triad nucleotide-binding protein 3 OS=Homo sapiens GN=HINT3 PE=1 SV=1  
Actin-binding protein anillin OS=Homo sapiens GN=ANLN PE=1 SV=2  
Adseverin OS=Homo sapiens GN=SCIN PE=1 SV=4  
60S ribosomal protein L3 (Fragment) OS=Homo sapiens GN=RPL3 PE=3 SV=1  
COP9 signalosome complex subunit 1 OS=Homo sapiens GN=GPS1 PE=4 SV=2  
Cytoplasmic dynein 1 light intermediate chain 1 OS=Homo sapiens GN=DYNC1LI1 PE=4  
60S ribosomal protein L13 OS=Homo sapiens GN=RPL13 PE=1 SV=4

Adapter molecule crk OS=Homo sapiens GN=CRK PE=1 SV=2  
NADH dehydrogenase [ubiquinone] 1 alpha subcomplex subunit 6 OS=Homo sapiens GN=N  
40S ribosomal protein S7 OS=Homo sapiens GN=RPS7 PE=1 SV=1  
FACT complex subunit SSRP1 OS=Homo sapiens GN=SSRP1 PE=1 SV=1  
Paraspeckle component 1 OS=Homo sapiens GN=PSPC1 PE=1 SV=1  
Far upstream element-binding protein 2 OS=Homo sapiens GN=KHSRP PE=1 SV=4  
1-phosphatidylinositol 4,5-bisphosphate phosphodiesterase beta-1 OS=Homo sapiens  
Phenylalanine--tRNA ligase alpha subunit OS=Homo sapiens GN=FARSA PE=1 SV=3  
Ras-related protein R-Ras2 OS=Homo sapiens GN=RRAS2 PE=2 SV=1  
Protein 4.1 OS=Homo sapiens GN=EPB41 PE=4 SV=1  
Protein transport protein Sec23A OS=Homo sapiens GN=SEC23A PE=4 SV=1  
Carnitine O-acetyltransferase OS=Homo sapiens GN=CRAT PE=1 SV=5  
Signal transducer and activator of transcription 3 OS=Homo sapiens GN=STAT3 PE=4  
Probable ATP-dependent RNA helicase DDX6 OS=Homo sapiens GN=DDX6 PE=1 SV=2  
Methionine--tRNA ligase, cytoplasmic OS=Homo sapiens GN=MARS PE=1 SV=2  
60S ribosomal protein L7a OS=Homo sapiens GN=RPL7A PE=1 SV=2  
3-hydroxyisobutyryl-CoA hydrolase, mitochondrial OS=Homo sapiens GN=HIBCH PE=1 SV  
Cluster of Abl interactor 1 OS=Homo sapiens GN=ABI1 PE=4 SV=2 (A6NFN2)  
AP-1 complex subunit gamma-1 OS=Homo sapiens GN=AP1G1 PE=2 SV=1  
Neural cell adhesion molecule L1-like protein OS=Homo sapiens GN=CHL1 PE=1 SV=4  
Peptidyl-prolyl cis-trans isomerase FKBP8 OS=Homo sapiens GN=FKBP8 PE=4 SV=1  
Sorting and assembly machinery component 50 homolog OS=Homo sapiens GN=SAMM50 PE=  
Thioredoxin reductase 1, cytoplasmic OS=Homo sapiens GN=TXNRD1 PE=2 SV=1  
Phosphatidylinositol 5-phosphate 4-kinase type-2 alpha OS=Homo sapiens GN=PIP4K2A  
Uncharacterized protein OS=Homo sapiens PE=4 SV=1  
Gamma-glutamylcyclotransferase OS=Homo sapiens GN=GGCT PE=1 SV=1  
Phosphatidylinositol transfer protein beta isoform OS=Homo sapiens GN=PITPNB PE=2  
Copine-2 OS=Homo sapiens GN=CPNE2 PE=1 SV=3  
PITH domain-containing protein 1 OS=Homo sapiens GN=PITHD1 PE=1 SV=1  
40S ribosomal protein S19 OS=Homo sapiens GN=RPS19 PE=1 SV=2  
Protein scribble homolog OS=Homo sapiens GN=SCRIB PE=1 SV=4  
Isochorismatase domain-containing protein 1 OS=Homo sapiens GN=ISOC1 PE=1 SV=3  
Phosphoacetylglucosamine mutase OS=Homo sapiens GN=PGM3 PE=3 SV=1  
Interferon-induced GTP-binding protein Mx1 OS=Homo sapiens GN=MX1 PE=3 SV=1  
Acylphosphatase-2 OS=Homo sapiens GN=ACYP2 PE=1 SV=2  
Sorting nexin-27 OS=Homo sapiens GN=SNX27 PE=1 SV=2  
ProSAAS OS=Homo sapiens GN=PCSK1N PE=1 SV=1  
Exocyst complex component 7 OS=Homo sapiens GN=EXOC7 PE=1 SV=3  
Glutathione S-transferase Mu 1 OS=Homo sapiens GN=GSTM1 PE=1 SV=3  
ADP-ribosylation factor-like protein 8B OS=Homo sapiens GN=ARL8B PE=1 SV=1  
Acyl-coenzyme A thioesterase 9, mitochondrial (Fragment) OS=Homo sapiens GN=ACOT9  
Branched-chain-amino-acid aminotransferase, cytosolic (Fragment) OS=Homo sapiens  
CD151 antigen OS=Homo sapiens GN=CD151 PE=4 SV=1  
UV excision repair protein RAD23 homolog B OS=Homo sapiens GN=RAD23B PE=1 SV=1  
Serine-threonine kinase receptor-associated protein OS=Homo sapiens GN=STRAP PE=2  
40S ribosomal protein S17 (Fragment) OS=Homo sapiens GN=RPS17 PE=3 SV=1  
Double-stranded RNA-specific adenosine deaminase OS=Homo sapiens GN=ADAR PE=4 SV=

Proliferating cell nuclear antigen OS=Homo sapiens GN=PCNA PE=1 SV=1  
Exocyst complex component 1 OS=Homo sapiens GN=EXOC1 PE=1 SV=4  
Protein TFG (Fragment) OS=Homo sapiens GN=TFG PE=4 SV=1  
Polymerase I and transcript release factor OS=Homo sapiens GN=PTRF PE=1 SV=1  
Protein tweety homolog 1 OS=Homo sapiens GN=TTYH1 PE=2 SV=1  
Reticulocalbin-2 OS=Homo sapiens GN=RCN2 PE=4 SV=1  
60S ribosomal protein L14 OS=Homo sapiens GN=RPL14 PE=4 SV=1  
Adenosine kinase OS=Homo sapiens GN=ADK PE=1 SV=2  
DnaJ homolog subfamily B member 11 OS=Homo sapiens GN=DNAJB11 PE=1 SV=1  
Splicing factor 3B subunit 3 OS=Homo sapiens GN=SF3B3 PE=1 SV=4  
Protein ERGIC-53 OS=Homo sapiens GN=LMAN1 PE=1 SV=2  
Cystathionine beta-synthase OS=Homo sapiens GN=CBS PE=4 SV=1  
Protein PML OS=Homo sapiens GN=PML PE=1 SV=3  
Nucleobindin-1 OS=Homo sapiens GN=NUCB1 PE=1 SV=4  
Heat shock protein beta-8 OS=Homo sapiens GN=HSPB8 PE=1 SV=1  
EPS15L1 protein OS=Homo sapiens GN=EPS15L1 PE=2 SV=1  
Importin-7 OS=Homo sapiens GN=IPO7 PE=1 SV=1  
Omega-amidase NIT2 OS=Homo sapiens GN=NIT2 PE=1 SV=1  
NHP2 non-histone chromosome protein 2-like 1 (*S. cerevisiae*) OS=Homo sapiens GN=N  
40S ribosomal protein S3a OS=Homo sapiens GN=RPS3A PE=3 SV=1  
Glutathione S-transferase kappa 1 OS=Homo sapiens GN=GSTK1 PE=4 SV=1  
Glycine cleavage system H protein, mitochondrial OS=Homo sapiens GN=GCSH PE=1 SV=  
Translation initiation factor eIF-2B subunit beta OS=Homo sapiens GN=EIF2B2 PE=1  
Ubiquitin-fold modifier 1 OS=Homo sapiens GN=UFM1 PE=1 SV=1  
40S ribosomal protein S28 OS=Homo sapiens GN=RPS28 PE=1 SV=1  
EPM2A-interacting protein 1 OS=Homo sapiens GN=EPM2AIP1 PE=1 SV=1  
Calcium/calmodulin-dependent protein kinase type 1D OS=Homo sapiens GN=CAMK1D PE=  
Small VCP/p97-interacting protein OS=Homo sapiens GN=SVIP PE=2 SV=1  
Calcineurin-like phosphoesterase domain-containing protein 1 OS=Homo sapiens GN=C  
Guanine nucleotide-binding protein G(I)/G(S)/G(O) subunit gamma-12 OS=Homo sapien  
Tropomodulin-2 OS=Homo sapiens GN=TMOD2 PE=1 SV=1  
60S ribosomal protein L9 (Fragment) OS=Homo sapiens GN=RPL9 PE=4 SV=1  
Septin-4 OS=Homo sapiens GN=SEPT4 PE=3 SV=1  
RNA-binding protein FUS OS=Homo sapiens GN=FUS PE=4 SV=1  
NADH dehydrogenase [ubiquinone] 1 alpha subcomplex subunit 10, mitochondrial OS=H  
ADP-ribosylation factor 6 OS=Homo sapiens GN=ARF6 PE=1 SV=2  
Metalloreductase STEAP3 OS=Homo sapiens GN=STEAP3 PE=1 SV=2  
Dynein light chain 2, cytoplasmic OS=Homo sapiens GN=DYNLL2 PE=1 SV=1  
NADH dehydrogenase [ubiquinone] 1 alpha subcomplex subunit 9, mitochondrial OS=Ho  
Thioredoxin-related transmembrane protein 1 OS=Homo sapiens GN=TMX1 PE=1 SV=1  
AP-2 complex subunit sigma OS=Homo sapiens GN=AP2S1 PE=1 SV=2  
Myoglobin (Fragment) OS=Homo sapiens GN=MB PE=3 SV=1  
MARCKS-related protein OS=Homo sapiens GN=MARCKSL1 PE=1 SV=2  
Exocyst complex component 4 OS=Homo sapiens GN=EXOC4 PE=1 SV=1  
Cysteine and histidine-rich domain-containing protein 1 OS=Homo sapiens GN=CHORDC  
Mitochondrial carrier homolog 2 OS=Homo sapiens GN=MTCH2 PE=1 SV=1  
Proteasome activator complex subunit 2 OS=Homo sapiens GN=PSME2 PE=4 SV=1

Replication protein A 70 kDa DNA-binding subunit OS=Homo sapiens GN=RPA1 PE=1 SV=1  
Mitochondrial import inner membrane translocase subunit TIM44 OS=Homo sapiens GN=  
Cytochrome b-245 heavy chain OS=Homo sapiens GN=CYBB PE=1 SV=2  
Oxidation resistance protein 1 OS=Homo sapiens GN=OXR1 PE=1 SV=2  
Uncharacterized protein OS=Homo sapiens GN=YJEFN3 PE=4 SV=1  
Ragulator complex protein LAMTOR3 OS=Homo sapiens GN=LAMTOR3 PE=4 SV=1  
Vacuolar protein sorting-associated protein VTA1 homolog OS=Homo sapiens GN=VTA1  
Raft-linking protein, isoform CRA\_c OS=Homo sapiens GN=RFTN1 PE=4 SV=1  
Acyl-CoA synthetase family member 2, mitochondrial OS=Homo sapiens GN=ACSF2 PE=2  
Elongation factor 1-beta OS=Homo sapiens GN=EEF1B2 PE=1 SV=3  
Nuclear pore complex protein Nup93 OS=Homo sapiens GN=NUP93 PE=4 SV=1  
Ketosamine-3-kinase OS=Homo sapiens GN=FN3KRP PE=4 SV=1  
Microtubule-associated protein 1S OS=Homo sapiens GN=MAP1S PE=2 SV=1  
Suppressor of G2 allele of SKP1 homolog OS=Homo sapiens GN=SUGT1 PE=1 SV=3  
Ornithine aminotransferase, mitochondrial OS=Homo sapiens GN=OAT PE=1 SV=1  
Guanine nucleotide-binding protein G(I)/G(S)/G(O) subunit gamma-5 OS=Homo sapiens  
PRA1 family protein 3 OS=Homo sapiens GN=ARL6IP5 PE=1 SV=1  
Myelin expression factor 2 OS=Homo sapiens GN=MYEF2 PE=1 SV=3  
ATP synthase subunit epsilon, mitochondrial OS=Homo sapiens GN=ATP5E PE=1 SV=2  
Gamma-butyrobetaine dioxygenase OS=Homo sapiens GN=BBOX1 PE=1 SV=1  
Solute carrier family 15 member 2 OS=Homo sapiens GN=SLC15A2 PE=2 SV=2  
RNA-binding protein Musashi homolog 2 OS=Homo sapiens GN=MSI2 PE=2 SV=1  
NADH dehydrogenase [ubiquinone] 1 beta subcomplex subunit 3 (Fragment) OS=Homo sa  
Heparin cofactor 2 OS=Homo sapiens GN=SERPIND1 PE=1 SV=3  
Ig heavy chain V-I region V35 OS=Homo sapiens PE=1 SV=1  
Microtubule-associated proteins 1A/1B light chain 3A OS=Homo sapiens GN=MAP1LC3A  
Calcium-binding protein 39 OS=Homo sapiens GN=CAB39 PE=1 SV=1  
Zinc finger CCCH-type antiviral protein 1 OS=Homo sapiens GN=ZC3HAV1 PE=4 SV=1  
40S ribosomal protein S13 OS=Homo sapiens GN=RPS13 PE=1 SV=2  
Myotubularin OS=Homo sapiens GN=MTM1 PE=2 SV=1  
D-dopachrome decarboxylase-like protein OS=Homo sapiens GN=DDTL PE=2 SV=1  
KH domain-containing, RNA-binding, signal transduction-associated protein 1 OS=Ho  
Cytochrome c oxidase subunit 6C OS=Homo sapiens GN=COX6C PE=1 SV=2  
26S protease regulatory subunit 6B OS=Homo sapiens GN=PSMC4 PE=1 SV=2  
Rho guanine nucleotide exchange factor 1 OS=Homo sapiens GN=ARHGEF1 PE=1 SV=2  
Serine palmitoyltransferase 2 OS=Homo sapiens GN=SPTLC2 PE=1 SV=1  
Remodeling and spacing factor 1 (Fragment) OS=Homo sapiens GN=RSF1 PE=4 SV=1  
Thy-1 membrane glycoprotein (Fragment) OS=Homo sapiens GN=THY1 PE=4 SV=1  
60S ribosomal protein L10 OS=Homo sapiens GN=RPL10 PE=1 SV=4  
Atlantin-3 OS=Homo sapiens GN=ATL3 PE=4 SV=1  
Immunoglobulin superfamily member 1 OS=Homo sapiens GN=IGSF1 PE=4 SV=1  
Leucine-rich repeat-containing protein 7 OS=Homo sapiens GN=LRRC7 PE=1 SV=1  
Myelin P2 protein OS=Homo sapiens GN=PMP2 PE=1 SV=3  
OCIA domain-containing protein 1 OS=Homo sapiens GN=OCIAD1 PE=4 SV=1  
DCN1-like protein 1 (Fragment) OS=Homo sapiens GN=DCUN1D1 PE=4 SV=1  
Short-chain-specific acyl-CoA dehydrogenase, mitochondrial OS=Homo sapiens GN=ACA  
Ubiquitin-like-conjugating enzyme ATG3 OS=Homo sapiens GN=ATG3 PE=4 SV=1

Apolipoprotein L2 OS=Homo sapiens GN=APOL2 PE=4 SV=1  
Sepiapterin reductase OS=Homo sapiens GN=SPR PE=1 SV=1  
Acyl-CoA-binding domain-containing protein 7 OS=Homo sapiens GN=ACBD7 PE=1 SV=1  
Ras and Rab interactor 1 OS=Homo sapiens GN=RIN1 PE=4 SV=1  
Protein NEDD8-MDP1 (Fragment) OS=Homo sapiens GN=NEDD8-MDP1 PE=4 SV=1  
Metalloproteinase inhibitor 1 OS=Homo sapiens GN=TIMP1 PE=1 SV=1  
Palmitoyl-protein thioesterase 1 OS=Homo sapiens GN=PPT1 PE=1 SV=1  
28 kDa heat- and acid-stable phosphoprotein OS=Homo sapiens GN=PDAP1 PE=1 SV=1  
Peroxisomal acyl-coenzyme A oxidase 1 OS=Homo sapiens GN=ACOX1 PE=1 SV=3  
Transmembrane protein 65 OS=Homo sapiens GN=TMEM65 PE=1 SV=2  
CD109 antigen OS=Homo sapiens GN=CD109 PE=1 SV=2  
Pyridoxal phosphate phosphatase OS=Homo sapiens GN=PDXP PE=1 SV=2  
COP9 signalosome complex subunit 3 OS=Homo sapiens GN=COPS3 PE=1 SV=3  
Cluster of EF-hand domain-containing protein D1 OS=Homo sapiens GN=EFHD1 PE=4 SV=  
Beta-arrestin-1 (Fragment) OS=Homo sapiens GN=ARRB1 PE=4 SV=1  
Proteasome subunit beta type-4 OS=Homo sapiens GN=PSMB4 PE=1 SV=4  
40S ribosomal protein S14 OS=Homo sapiens GN=RPS14 PE=1 SV=3  
GLI pathogenesis-related 2 OS=Homo sapiens GN=GLIPR2 PE=2 SV=1  
AP-3 complex subunit beta-1 OS=Homo sapiens GN=AP3B1 PE=4 SV=1  
L-xylulose reductase (Fragment) OS=Homo sapiens GN=DCXR PE=3 SV=1  
Phospholipid transfer protein OS=Homo sapiens GN=PLTP PE=2 SV=1  
Myosin regulatory light chain 12A OS=Homo sapiens GN=MYL12A PE=4 SV=1  
Prolyl endopeptidase OS=Homo sapiens GN=PREP PE=1 SV=2  
Eukaryotic translation initiation factor 3 subunit B OS=Homo sapiens GN=EIF3B PE=  
HCG1770615, isoform CRA\_b OS=Homo sapiens GN=TSC22D4 PE=2 SV=1  
Apoptosis inhibitor 5 OS=Homo sapiens GN=API5 PE=4 SV=1  
Mitochondrial import receptor subunit TOM40 homolog OS=Homo sapiens GN=TOMM40 PE=  
UDP-glucose:glycoprotein glucosyltransferase 1 OS=Homo sapiens GN=UGGT1 PE=1 SV=3  
Glycerol-3-phosphate dehydrogenase [NAD(+)], cytoplasmic (Fragment) OS=Homo sapie  
SUMO-activating enzyme subunit 2 OS=Homo sapiens GN=UBA2 PE=1 SV=2  
DCC-interacting protein 13-alpha OS=Homo sapiens GN=APPL1 PE=1 SV=1  
Apolipoprotein B-100 OS=Homo sapiens GN=APOB PE=1 SV=2  
Actin-binding LIM protein 1 OS=Homo sapiens GN=ABLIM1 PE=4 SV=1  
Tumor suppressor p53-binding protein 1 OS=Homo sapiens GN=TP53BP1 PE=4 SV=2  
Lysophospholipase-like protein 1 OS=Homo sapiens GN=LYPLAL1 PE=1 SV=3  
Protein enabled homolog OS=Homo sapiens GN=ENAH PE=1 SV=2  
Apolipoprotein 0 OS=Homo sapiens GN=APO0 PE=4 SV=1  
Nuclear receptor-binding protein OS=Homo sapiens GN=NRBP1 PE=4 SV=1  
Galectin-3 OS=Homo sapiens GN=LGALS3 PE=1 SV=5  
E3 ubiquitin/ISG15 ligase TRIM25 OS=Homo sapiens GN=TRIM25 PE=1 SV=2  
Phosphomevalonate kinase OS=Homo sapiens GN=PMVK PE=1 SV=3  
Phosphoglycolate phosphatase OS=Homo sapiens GN=PGP PE=1 SV=1  
Cluster of Fragile X mental retardation syndrome-related protein 1 OS=Homo sapien  
Insulin-like growth factor II OS=Homo sapiens GN=IGF2 PE=3 SV=2  
Complement component C6 OS=Homo sapiens GN=C6 PE=1 SV=3  
Opioid binding protein/cell adhesion molecule-like isoform c OS=Homo sapiens GN=0  
ATP-binding cassette sub-family F member 1 (Fragment) OS=Homo sapiens GN=ABCF1 PE

Collagen alpha-2(IV) chain OS=Homo sapiens GN=COL4A2 PE=1 SV=4  
Signal recognition particle 9 kDa protein OS=Homo sapiens GN=SRP9 PE=1 SV=2  
Eukaryotic translation initiation factor 2 subunit 3 OS=Homo sapiens GN=EIF2S3 PE=1 SV=2  
Ferritin light chain OS=Homo sapiens GN=FTL PE=1 SV=2  
Leucine-rich repeat-containing protein 4B OS=Homo sapiens GN=LRRC4B PE=1 SV=3  
Ig kappa chain V-III region SIE OS=Homo sapiens PE=1 SV=1  
Nicastrin OS=Homo sapiens GN=NCSTN PE=4 SV=2  
ADP-ribosylation factor-like protein 8A OS=Homo sapiens GN=ARL8A PE=1 SV=1  
Cluster of 3-hydroxymethyl-3-methylglutaryl-Coenzyme A lyase OS=Homo sapiens GN=HMGCL  
Wolframin OS=Homo sapiens GN=WFS1 PE=1 SV=2  
60S ribosomal protein L27a OS=Homo sapiens GN=RPL27A PE=3 SV=1  
GTPase NRas OS=Homo sapiens GN=NRAS PE=1 SV=1  
Aquaporin-1 OS=Homo sapiens GN=AQP1 PE=2 SV=1  
Laminin subunit alpha-4 OS=Homo sapiens GN=LAMA4 PE=1 SV=4  
Citrate lyase subunit beta-like protein, mitochondrial OS=Homo sapiens GN=CLYBL P  
C-Jun-amino-terminal kinase-interacting protein 4 OS=Homo sapiens GN=SPAG9 PE=1 SV=1  
Leucine--tRNA ligase, cytoplasmic OS=Homo sapiens GN=LARS PE=2 SV=1  
26S proteasome non-ATPase regulatory subunit 7 OS=Homo sapiens GN=PSMD7 PE=2 SV=1  
Membrane protein MLC1 OS=Homo sapiens GN=MLC1 PE=2 SV=1  
Thioredoxin reductase 2, mitochondrial OS=Homo sapiens GN=TXNRD2 PE=3 SV=1  
NudC domain-containing protein 2 OS=Homo sapiens GN=NUDCD2 PE=4 SV=1  
Ras GTPase-activating protein-binding protein 1 (Fragment) OS=Homo sapiens GN=G3BP1  
Serine/threonine-protein phosphatase 2A 56 kDa regulatory subunit delta isoform 0  
Rab GTPase-binding effector protein 1 OS=Homo sapiens GN=RABEP1 PE=4 SV=1  
Adaptin ear-binding coat-associated protein 2 OS=Homo sapiens GN=NECAP2 PE=4 SV=1  
60S ribosomal protein L18 (Fragment) OS=Homo sapiens GN=RPL18 PE=4 SV=1  
Tight junction protein 1 (Zona occludens 1), isoform CRA\_a OS=Homo sapiens GN=TJP1  
Regulator of microtubule dynamics protein 3 (Fragment) OS=Homo sapiens GN=FAM82A2  
Cleavage and polyadenylation-specificity factor subunit 5 (Fragment) OS=Homo sapiens GN=CPSF5  
Hydroxyacylglutathione hydrolase, mitochondrial (Fragment) OS=Homo sapiens GN=HAGHL  
E3 ubiquitin-protein ligase CHIP (Fragment) OS=Homo sapiens GN=STUB1 PE=4 SV=1  
Microsomal glutathione S-transferase 3 OS=Homo sapiens GN=MGST3 PE=1 SV=1  
Hepatocyte growth factor-regulated tyrosine kinase substrate OS=Homo sapiens GN=HGFR  
Non-syndromic hearing impairment protein 5 OS=Homo sapiens GN=DFNA5 PE=1 SV=2  
NADH dehydrogenase [ubiquinone] 1 alpha subcomplex subunit 7 OS=Homo sapiens GN=ND7  
Serine/threonine-protein kinase OSR1 OS=Homo sapiens GN=OXSR1 PE=1 SV=1  
Cytochrome b5 OS=Homo sapiens GN=CYB5A PE=1 SV=2  
Hypoxanthine-guanine phosphoribosyltransferase OS=Homo sapiens GN=HPRT1 PE=1 SV=2  
Cathepsin G OS=Homo sapiens GN=CTSG PE=1 SV=2  
Mesencephalic astrocyte-derived neurotrophic factor OS=Homo sapiens GN=MANF PE=1 SV=1  
40S ribosomal protein S26 OS=Homo sapiens GN=RPS26 PE=1 SV=3  
Guanidinoacetate N-methyltransferase OS=Homo sapiens GN=GAMT PE=1 SV=1  
Ras suppressor protein 1 OS=Homo sapiens GN=RSU1 PE=1 SV=3  
Splicing factor 3A subunit 1 OS=Homo sapiens GN=SF3A1 PE=1 SV=1  
Putative ATP-dependent Clp protease proteolytic subunit, mitochondrial OS=Homo sapiens GN=CLPP  
ER membrane protein complex subunit 1 OS=Homo sapiens GN=EMC1 PE=1 SV=1  
Trans-L-3-hydroxyproline dehydratase OS=Homo sapiens GN=L3HYPDH PE=1 SV=2

Chloride intracellular channel protein 6 OS=Homo sapiens GN=CLIC6 PE=2 SV=3  
Charged multivesicular body protein 4b OS=Homo sapiens GN=CHMP4B PE=1 SV=1  
Calcium-regulated heat stable protein 1 OS=Homo sapiens GN=CARHSP1 PE=1 SV=2  
Rap guanine nucleotide exchange factor 2 OS=Homo sapiens GN=RAPGEF2 PE=1 SV=1  
Lysosome-associated membrane glycoprotein 2 OS=Homo sapiens GN=LAMP2 PE=2 SV=1  
Basigin OS=Homo sapiens GN=BSG PE=4 SV=1  
Regulator of nonsense transcripts 1 OS=Homo sapiens GN=UPF1 PE=1 SV=2  
Translocon-associated protein subunit alpha OS=Homo sapiens GN=SSR1 PE=4 SV=1  
Adenine phosphoribosyltransferase OS=Homo sapiens GN=APRT PE=4 SV=1  
ATP-binding cassette sub-family B member 7, mitochondrial OS=Homo sapiens GN=ABCB  
Fatty acid-binding protein, heart OS=Homo sapiens GN=FABP3 PE=1 SV=4  
Dipeptidyl aminopeptidase-like protein 6 OS=Homo sapiens GN=DPP6 PE=4 SV=1  
Eukaryotic peptide chain release factor subunit 1 OS=Homo sapiens GN=ETF1 PE=2 SV=1  
Unconventional myosin-XVIIIa OS=Homo sapiens GN=MYO18A PE=4 SV=1  
Pirin OS=Homo sapiens GN=PIR PE=1 SV=1  
Casein kinase II subunit beta OS=Homo sapiens GN=CSNK2B PE=1 SV=1  
NADH dehydrogenase [ubiquinone] 1 beta subcomplex subunit 4 OS=Homo sapiens GN=ND  
Keratin, type II cytoskeletal 5 OS=Homo sapiens GN=KRT5 PE=1 SV=3  
Glypican-1 (Fragment) OS=Homo sapiens GN=GPC1 PE=3 SV=1  
Casein kinase II subunit alpha OS=Homo sapiens GN=CSNK2A1 PE=4 SV=1  
Protein phosphatase 2A activator, regulatory subunit 4 OS=Homo sapiens GN=PPP2R4  
Inorganic pyrophosphatase 2, mitochondrial OS=Homo sapiens GN=PPA2 PE=4 SV=1  
Eukaryotic translation initiation factor 3 subunit J OS=Homo sapiens GN=EIF3J PE=1  
Synaptobrevin homolog YKT6 OS=Homo sapiens GN=YKT6 PE=1 SV=1  
Reticulocalbin-1 OS=Homo sapiens GN=RCN1 PE=1 SV=1  
Cluster of Protein phosphatase 1A OS=Homo sapiens GN=PPM1A PE=3 SV=1 (J3KNM0)  
AP-1 complex subunit mu-1 OS=Homo sapiens GN=AP1M1 PE=4 SV=1  
Plexin domain-containing protein 2 OS=Homo sapiens GN=PLXDC2 PE=4 SV=1  
Tyrosine-protein phosphatase non-receptor type 23 OS=Homo sapiens GN=PTPN23 PE=2  
Bis(5'-nucleosyl)-tetrphosphatase [asymmetrical] OS=Homo sapiens GN=NUDT2 PE=1 S  
GTPase KRas OS=Homo sapiens GN=KRAS PE=1 SV=1  
Myeloid cell nuclear differentiation antigen OS=Homo sapiens GN=MNDA PE=1 SV=1  
Caprin-1 OS=Homo sapiens GN=CAPRIN1 PE=4 SV=1  
NADH dehydrogenase [ubiquinone] 1 alpha subcomplex subunit 11 OS=Homo sapiens GN=ND  
Calcyclin binding protein OS=Homo sapiens GN=CACYBP PE=2 SV=1  
Zyxin (Fragment) OS=Homo sapiens GN=ZYX PE=4 SV=1  
Epididymal secretory protein E1 OS=Homo sapiens GN=NPC2 PE=2 SV=1  
Ras GTPase-activating-like protein IQGAP2 OS=Homo sapiens GN=IQGAP2 PE=1 SV=4  
60S ribosomal protein L36 OS=Homo sapiens GN=RPL36 PE=1 SV=3  
Protein C15orf38-AP3S2 OS=Homo sapiens GN=C15orf38-AP3S2 PE=4 SV=1  
RNA binding motif protein, X-linked-like-1 OS=Homo sapiens GN=RBMXL1 PE=1 SV=1  
CD99 antigen OS=Homo sapiens GN=CD99 PE=4 SV=1  
von Willebrand factor A domain-containing protein 1 OS=Homo sapiens GN=VWA1 PE=2  
Transformer-2 protein homolog beta (Fragment) OS=Homo sapiens GN=TRA2B PE=4 SV=1  
Prefoldin subunit 5 (Fragment) OS=Homo sapiens GN=PFDN5 PE=4 SV=1  
Cluster of Ig kappa chain V-III region VG (Fragment) OS=Homo sapiens PE=1 SV=1 (P  
Calcineurin subunit B type 1 OS=Homo sapiens GN=PPP3R1 PE=4 SV=1

**Fibulin-5 OS=Homo sapiens GN=FBLN5 PE=4 SV=1**

Protein arginine N-methyltransferase 5, N-terminally processed (Fragment) OS=Homo sapiens PE=4 SV=2  
Uncharacterized protein (Fragment) OS=Homo sapiens PE=4 SV=2  
Putative pre-mRNA-splicing factor ATP-dependent RNA helicase DHX15 OS=Homo sapiens PE=1 SV=6  
Translational activator GCN1 OS=Homo sapiens GN=GCN1L1 PE=1 SV=6  
Integrin-linked protein kinase OS=Homo sapiens GN=ILK PE=2 SV=1  
Serine/arginine repetitive matrix protein 2 OS=Homo sapiens GN=SRRM2 PE=1 SV=2  
Uncharacterized protein C9orf142 OS=Homo sapiens GN=C9orf142 PE=1 SV=2  
Methylcrotonoyl-CoA carboxylase subunit alpha, mitochondrial (Fragment) OS=Homo sapiens PE=1 SV=1  
Hepatitis B virus X-interacting protein OS=Homo sapiens GN=HBXIP PE=4 SV=1  
Centrin-2 OS=Homo sapiens GN=CETN2 PE=1 SV=1  
Alkyldihydroxyacetonephosphate synthase, peroxisomal OS=Homo sapiens GN=AGPS PE=1 SV=1  
Syntaxin-binding protein 6 OS=Homo sapiens GN=STXBP6 PE=4 SV=1  
Ubiquitin carboxyl-terminal hydrolase L5 OS=Homo sapiens GN=UCHL5 PE=2 SV=1  
Quinone oxidoreductase-like protein 1 OS=Homo sapiens GN=CRYZL1 PE=4 SV=1  
Lysosome-associated membrane glycoprotein 1 OS=Homo sapiens GN=LAMP1 PE=1 SV=3  
Sulfurtransferase OS=Homo sapiens GN=MPST PE=4 SV=1  
CDK5 regulatory subunit-associated protein 3 OS=Homo sapiens GN=CDK5RAP3 PE=4 SV=1  
Neurabin-2 OS=Homo sapiens GN=PPP1R9B PE=1 SV=2  
Inosine triphosphate pyrophosphatase OS=Homo sapiens GN=ITPA PE=1 SV=2  
Diphosphoinositol polyphosphate phosphohydrolase 1 OS=Homo sapiens GN=NUDT3 PE=1 SV=1  
Dipeptidyl peptidase 3 OS=Homo sapiens GN=DPP3 PE=4 SV=1  
Alpha-parvin OS=Homo sapiens GN=PARVA PE=2 SV=1  
AMP deaminase 2 OS=Homo sapiens GN=AMPD2 PE=4 SV=1  
Ubiquitin-conjugating enzyme E2 D3 OS=Homo sapiens GN=UBE2D3 PE=1 SV=1  
Synaptic vesicle membrane protein VAT-1 homolog-like OS=Homo sapiens GN=VAT1L PE=1 SV=4  
40S ribosomal protein S5 OS=Homo sapiens GN=RPS5 PE=1 SV=4  
Eukaryotic translation initiation factor 3 subunit L OS=Homo sapiens GN=EIF3EIP PE=1 SV=1  
HEAT repeat-containing protein 2 OS=Homo sapiens GN=HEATR2 PE=1 SV=4

**Fibulin-2 OS=Homo sapiens GN=FBLN2 PE=4 SV=1**

Protein mago nashi homolog 2 OS=Homo sapiens GN=MAGOHB PE=4 SV=1  
Importin subunit alpha-4 OS=Homo sapiens GN=KPNA4 PE=1 SV=1  
Apolipoprotein C-I OS=Homo sapiens GN=APOC1 PE=1 SV=1  
Microfibril-associated glycoprotein 4 OS=Homo sapiens GN=MFAP4 PE=4 SV=1  
KIF1-binding protein OS=Homo sapiens GN=KIAA1279 PE=1 SV=1  
Protein phosphatase 1G OS=Homo sapiens GN=PPM1G PE=1 SV=1  
Dual specificity protein phosphatase 3 OS=Homo sapiens GN=DUSP3 PE=1 SV=1  
Aminoacylase-1 OS=Homo sapiens GN=ACY1 PE=2 SV=1  
Ras-related protein Rab-21 OS=Homo sapiens GN=RAB21 PE=1 SV=3  
Acylpyruvase FAHD1, mitochondrial OS=Homo sapiens GN=FAHD1 PE=4 SV=1  
ELAV (Embryonic lethal, abnormal vision, Drosophila)-like 4 (Hu antigen D) OS=Homo sapiens PE=1 SV=1  
CTP synthase 2 OS=Homo sapiens GN=CTPS2 PE=1 SV=1  
Neutrophil defensin 1 OS=Homo sapiens GN=DEFA1 PE=1 SV=1  
Ubiquitin-conjugating enzyme E2 K OS=Homo sapiens GN=UBE2K PE=2 SV=1  
AH receptor-interacting protein OS=Homo sapiens GN=AIP PE=1 SV=2  
Complement factor H-related 5 OS=Homo sapiens GN=CFHR5 PE=2 SV=1  
Alpha-1-acid glycoprotein 2 OS=Homo sapiens GN=ORM2 PE=1 SV=2



Synaptic vesicle glycoprotein 2A OS=Homo sapiens GN=SV2A PE=1 SV=1  
Stearoyl-CoA desaturase 5 OS=Homo sapiens GN=SCD5 PE=2 SV=2  
Exocyst complex component 8 OS=Homo sapiens GN=EXOC8 PE=1 SV=2  
Protein BRICK1 OS=Homo sapiens GN=BRK1 PE=4 SV=1  
Acyl carrier protein (Fragment) OS=Homo sapiens GN=NDUFAB1 PE=3 SV=1  
Sodium/potassium-transporting ATPase subunit beta-3 OS=Homo sapiens GN=ATP1B3 PE=  
Cytochrome b-c1 complex subunit 6, mitochondrial OS=Homo sapiens GN=UQCRH PE=1 SV  
Alpha-N-acetylgalactosaminidase OS=Homo sapiens GN=NAGA PE=1 SV=2  
Beta-1,3-glucosyltransferase OS=Homo sapiens GN=B3GALTL PE=1 SV=2  
Mitotic checkpoint protein BUB3 OS=Homo sapiens GN=BUB3 PE=2 SV=1  
Neurocalcin-delta OS=Homo sapiens GN=NCALD PE=2 SV=2  
Mimecan OS=Homo sapiens GN=OGN PE=1 SV=1  
Mitochondria-eating protein OS=Homo sapiens GN=SPATA18 PE=4 SV=1  
Histone-binding protein RBBP7 OS=Homo sapiens GN=RBBP7 PE=4 SV=1  
Protein flightless-1 homolog OS=Homo sapiens GN=FLII PE=4 SV=1  
Signal recognition particle 14 kDa protein OS=Homo sapiens GN=SRP14 PE=1 SV=2  
Clathrin interactor 1 OS=Homo sapiens GN=CLINT1 PE=1 SV=1  
Protein FAM186B OS=Homo sapiens GN=FAM186B PE=2 SV=1  
Kinesin-like protein KIF13B OS=Homo sapiens GN=KIF13B PE=3 SV=1  
Small ubiquitin-related modifier 3 OS=Homo sapiens GN=SUMO3 PE=4 SV=1  
Apolipoprotein C-III OS=Homo sapiens GN=APOC3 PE=4 SV=1  
Nucleoporin p54 OS=Homo sapiens GN=NUP54 PE=2 SV=1  
60S ribosomal protein L24 OS=Homo sapiens GN=RPL24 PE=4 SV=1  
Nascent polypeptide-associated complex subunit alpha OS=Homo sapiens GN=NACA PE=4  
Protein FAM184A OS=Homo sapiens GN=FAM184A PE=4 SV=1  
NADH dehydrogenase [ubiquinone] 1 alpha subcomplex subunit 4 OS=Homo sapiens GN=N  
Guanine nucleotide-binding protein G(I)/G(S)/G(O) subunit gamma-4 OS=Homo sapiens  
ATP synthase subunit e, mitochondrial OS=Homo sapiens GN=ATP5I PE=1 SV=2  
Peptidase inhibitor 16 OS=Homo sapiens GN=PI16 PE=1 SV=1  
Neuronal growth regulator 1 OS=Homo sapiens GN=NEGR1 PE=1 SV=3  
Lysophosphatidylcholine acyltransferase 1 OS=Homo sapiens GN=LPCAT1 PE=1 SV=2  
DnaJ homolog subfamily C member 5 OS=Homo sapiens GN=DNAJC5 PE=1 SV=1  
Ig lambda chain V-III region LOI OS=Homo sapiens PE=1 SV=1  
14 kDa phosphohistidine phosphatase OS=Homo sapiens GN=PHPT1 PE=1 SV=1  
UV excision repair protein RAD23 homolog A OS=Homo sapiens GN=RAD23A PE=1 SV=1  
Integrin beta OS=Homo sapiens GN=ITGB8 PE=2 SV=1  
Tropomodulin-3 (Fragment) OS=Homo sapiens GN=TMOD3 PE=4 SV=1  
HCG2027369, isoform CRA\_a OS=Homo sapiens GN=KIF21B PE=2 SV=1  
Vacuolar protein sorting-associated protein 13C OS=Homo sapiens GN=VPS13C PE=1 SV  
Regulation of nuclear pre-mRNA domain containing 1B (Fragment) OS=Homo sapiens GN  
ADP-sugar pyrophosphatase OS=Homo sapiens GN=NUDT5 PE=3 SV=1  
Syntaxin 4A (Placental), isoform CRA\_c OS=Homo sapiens GN=STX4 PE=2 SV=1  
Target of Myb protein 1 (Fragment) OS=Homo sapiens GN=TOM1 PE=4 SV=1  
Guanine nucleotide binding protein-like 1 (Fragment) OS=Homo sapiens GN=GNL1 PE=4  
Dynein light chain roadblock-type 1 OS=Homo sapiens GN=DYNLRB1 PE=4 SV=1  
NADH dehydrogenase [ubiquinone] iron-sulfur protein 7, mitochondrial OS=Homo sapi  
Retinol dehydrogenase 11 OS=Homo sapiens GN=RDH11 PE=2 SV=1

Eukaryotic translation initiation factor 3 subunit D OS=Homo sapiens GN=EIF3D PE=Galactokinase OS=Homo sapiens GN=GALK1 PE=2 SV=1  
Sec1 family domain containing 1, isoform CRA\_b OS=Homo sapiens GN=SCFD1 PE=2 SV=1  
Eukaryotic translation initiation factor 3 subunit K OS=Homo sapiens GN=EIF3K PE=Peroxisomal carnitine 0-octanoyltransferase OS=Homo sapiens GN=CROT PE=3 SV=1  
60S ribosomal protein L28 OS=Homo sapiens GN=RPL28 PE=4 SV=1  
Myoferlin OS=Homo sapiens GN=MYOF PE=4 SV=2  
Acyl-protein thioesterase 1 (Fragment) OS=Homo sapiens GN=LYPLA1 PE=4 SV=1  
Pyruvate dehydrogenase protein X component, mitochondrial OS=Homo sapiens GN=PDHX  
Protein Clorf27 OS=Homo sapiens GN=Clorf27 PE=4 SV=1  
N-alpha-acetyltransferase 38, NatC auxiliary subunit OS=Homo sapiens GN=NAA38 PE=Neuroplastin OS=Homo sapiens GN=NPTN PE=4 SV=1  
Neural cell adhesion molecule L1 OS=Homo sapiens GN=L1CAM PE=4 SV=1  
Neutral cholesterol ester hydrolase 1 OS=Homo sapiens GN=NCEH1 PE=4 SV=1  
LIM domain and actin-binding protein 1 OS=Homo sapiens GN=LIMA1 PE=4 SV=1  
UPF0160 protein MYG1, mitochondrial OS=Homo sapiens GN=C12orf10 PE=4 SV=1  
V-type proton ATPase subunit D OS=Homo sapiens GN=ATP6V1D PE=4 SV=1  
Leucine-rich repeat-containing protein 57 (Fragment) OS=Homo sapiens GN=LRRC57 PE=Zinc finger protein ZPR1 (Fragment) OS=Homo sapiens GN=ZNF259 PE=4 SV=1  
Nodal modulator 3 OS=Homo sapiens GN=NOMO3 PE=4 SV=1  
ARF GTPase-activating protein GIT1 OS=Homo sapiens GN=GIT1 PE=4 SV=1  
Interferon-induced protein with tetratricopeptide repeats 3 OS=Homo sapiens GN=IF  
NADH dehydrogenase [ubiquinone] 1 alpha subcomplex subunit 2 OS=Homo sapiens GN=N  
Pentraxin-related protein PTX3 OS=Homo sapiens GN=PTX3 PE=1 SV=3  
Peptidyl-prolyl cis-trans isomerase FKBP2 OS=Homo sapiens GN=FKBP2 PE=1 SV=2  
OX-2 membrane glycoprotein OS=Homo sapiens GN=CD200 PE=1 SV=4  
COP9 signalosome complex subunit 2 OS=Homo sapiens GN=COPS2 PE=1 SV=1  
Complement C1q tumor necrosis factor-related protein 5 OS=Homo sapiens GN=C1QTNF5  
LanC-like protein 2 OS=Homo sapiens GN=LANCL2 PE=1 SV=1  
Prostaglandin F2 receptor negative regulator OS=Homo sapiens GN=PTGFRN PE=1 SV=2  
C-type lectin domain family 11 member A OS=Homo sapiens GN=CLEC11A PE=1 SV=1  
Mitochondrial fission 1 protein OS=Homo sapiens GN=FIS1 PE=1 SV=2  
Exportin-7 OS=Homo sapiens GN=XP07 PE=4 SV=1  
Gamma-glutamyltransferase 5 OS=Homo sapiens GN=GGT5 PE=4 SV=1  
Translin-associated protein X OS=Homo sapiens GN=TSNAX PE=1 SV=1  
Membrane-associated progesterone receptor component 2 OS=Homo sapiens GN=PGRMC2 P  
Sulfide:quinone oxidoreductase, mitochondrial OS=Homo sapiens GN=SQRDL PE=1 SV=1  
Chromobox homolog 5 (HP1 alpha homolog, Drosophila), isoform CRA\_a OS=Homo sapien  
COP9 signalosome complex subunit 8 OS=Homo sapiens GN=COPS8 PE=4 SV=1  
Mitochondrial-processing peptidase subunit alpha OS=Homo sapiens GN=PMPCA PE=1 SV  
LIM and senescent cell antigen-like-containing domain protein 1 OS=Homo sapiens G  
Low molecular weight phosphotyrosine protein phosphatase OS=Homo sapiens GN=ACP1  
BTB/POZ domain-containing protein KCTD21 (Fragment) OS=Homo sapiens GN=KCTD21 PE=SPARC-like protein 1 OS=Homo sapiens GN=SPARCL1 PE=2 SV=1  
B-cell receptor-associated protein 29 OS=Homo sapiens GN=BCAP29 PE=4 SV=1  
Proteasome subunit beta type-6 OS=Homo sapiens GN=PSMB6 PE=1 SV=4  
ADP-ribosylation factor-like protein 2 OS=Homo sapiens GN=ARL2 PE=1 SV=4

Golgi apparatus protein 1 OS=Homo sapiens GN=GLG1 PE=1 SV=2  
Protein NDRG4 OS=Homo sapiens GN=NDRG4 PE=2 SV=1  
L-aminoadipate-semialdehyde dehydrogenase-phosphopantetheinyl transferase (Fragme  
TBC1 domain family member 17 OS=Homo sapiens GN=TBC1D17 PE=4 SV=1  
Signal recognition particle 68 kDa protein OS=Homo sapiens GN=SRP68 PE=4 SV=1  
60 kDa SS-A/Ro ribonucleoprotein OS=Homo sapiens GN=TROVE2 PE=1 SV=2  
Peptidyl-prolyl cis-trans isomerase FKBP3 OS=Homo sapiens GN=FKBP3 PE=1 SV=1  
NADPH--cytochrome P450 reductase OS=Homo sapiens GN=POR PE=4 SV=1  
Isoform 2 of Formin-like protein 2 OS=Homo sapiens GN=FMNL2  
Ethanolamine-phosphate cytidyltransferase OS=Homo sapiens GN=PCYT2 PE=2 SV=1  
Disco-interacting protein 2 homolog B OS=Homo sapiens GN=DIP2B PE=1 SV=3  
Plasminogen activator inhibitor 1 RNA-binding protein OS=Homo sapiens GN=SERBP1 P  
Spermidine synthase OS=Homo sapiens GN=SRM PE=1 SV=1  
Pre-mRNA branch site protein p14 OS=Homo sapiens GN=SF3B14 PE=1 SV=1  
Ganglioside-induced differentiation-associated protein 1 OS=Homo sapiens GN=GDAP1  
Arf-GAP domain and FG repeat-containing protein 1 OS=Homo sapiens GN=AGFG1 PE=4 S  
Protein VAC14 homolog OS=Homo sapiens GN=VAC14 PE=4 SV=1  
26S proteasome non-ATPase regulatory subunit 9 OS=Homo sapiens GN=PSMD9 PE=4 SV=1  
Endoplasmic reticulum lectin 1 OS=Homo sapiens GN=ERLEC1 PE=4 SV=1  
Secreted glypican-4 OS=Homo sapiens GN=GPC4 PE=2 SV=1  
Nuclear receptor coactivator 5 OS=Homo sapiens GN=NCOA5 PE=1 SV=2  
Protein kinase C and casein kinase substrate in neurons 2 (Fragment) OS=Homo sapi  
Epidermal growth factor receptor OS=Homo sapiens GN=EGFR PE=3 SV=2  
UPF0553 protein C9orf64 OS=Homo sapiens GN=C9orf64 PE=1 SV=1  
Large neutral amino acids transporter small subunit 1 OS=Homo sapiens GN=SLC7A5 P  
Splicing factor U2AF 35 kDa subunit OS=Homo sapiens GN=U2AF1 PE=1 SV=3  
60S ribosomal protein L17 (Fragment) OS=Homo sapiens GN=RPL17 PE=3 SV=1  
Sorting nexin-12 OS=Homo sapiens GN=SNX12 PE=1 SV=3  
Lysophospholipid acyltransferase 7 OS=Homo sapiens GN=MBOAT7 PE=1 SV=2  
Anoctamin-10 OS=Homo sapiens GN=ANO10 PE=1 SV=2  
ER membrane protein complex subunit 2 OS=Homo sapiens GN=EMC2 PE=1 SV=1  
Adenylate kinase isoenzyme 5 OS=Homo sapiens GN=AK5 PE=1 SV=2  
Kynurenine--oxoglutarate transaminase 3 OS=Homo sapiens GN=CCBL2 PE=1 SV=1  
Ras-related protein Rab-8B (Fragment) OS=Homo sapiens GN=RAB8B PE=3 SV=1  
Probable ubiquitin carboxyl-terminal hydrolase FAF-Y OS=Homo sapiens GN=USP9Y PE=  
Unconventional myosin-IXb OS=Homo sapiens GN=MYO9B PE=1 SV=3  
Synaptopodin-2 (Fragment) OS=Homo sapiens GN=SYNP02 PE=4 SV=1  
Nuclear ubiquitous casein and cyclin-dependent kinase substrate 1 OS=Homo sapiens  
Choline dehydrogenase, mitochondrial OS=Homo sapiens GN=CHDH PE=2 SV=2  
Aldehyde dehydrogenase family 16 member A1 OS=Homo sapiens GN=ALDH16A1 PE=4 SV=1  
Protein OSCP1 OS=Homo sapiens GN=OSCP1 PE=4 SV=2  
Deoxyuridine 5'-triphosphate nucleotidohydrolase, mitochondrial (Fragment) OS=Hom  
Signal recognition particle 72 kDa protein OS=Homo sapiens GN=SRP72 PE=4 SV=1  
Polyadenylate-binding protein-interacting protein 1 OS=Homo sapiens GN=PAIP1 PE=4  
Katanin p80 WD40-containing subunit B1 OS=Homo sapiens GN=KATNB1 PE=1 SV=1  
Estradiol 17-beta-dehydrogenase 11 OS=Homo sapiens GN=HSD17B11 PE=4 SV=1  
Monofunctional C1-tetrahydrofolate synthase, mitochondrial OS=Homo sapiens GN=MTH

Cadherin-20 OS=Homo sapiens GN=CDH20 PE=2 SV=2  
Prolargin OS=Homo sapiens GN=PRELP PE=1 SV=1  
Mothers against decapentaplegic homolog 5 OS=Homo sapiens GN=SMAD5 PE=4 SV=1  
Prefoldin subunit 3 OS=Homo sapiens GN=VBP1 PE=4 SV=1  
U1 small nuclear ribonucleoprotein A OS=Homo sapiens GN=SNRPA PE=1 SV=3  
WASH complex subunit 7 OS=Homo sapiens GN=KIAA1033 PE=1 SV=2  
Glycerol-3-phosphate dehydrogenase 1-like protein OS=Homo sapiens GN=GPD1L PE=1 S  
Gamma-glutamyl hydrolase OS=Homo sapiens GN=GGH PE=1 SV=2  
Ataxin-10 OS=Homo sapiens GN=ATXN10 PE=1 SV=1  
Splicing factor 3B subunit 1 OS=Homo sapiens GN=SF3B1 PE=1 SV=3  
Diphosphoinositol polyphosphate phosphohydrolase 2 OS=Homo sapiens GN=NUDT4 PE=1  
PRA1 family protein 2 OS=Homo sapiens GN=PRAF2 PE=1 SV=1  
Calponin-2 OS=Homo sapiens GN=CNN2 PE=2 SV=1  
Phosphatidylinositide phosphatase SAC1 OS=Homo sapiens GN=SACM1L PE=2 SV=1  
Platelet-activating factor acetylhydrolase IB subunit beta OS=Homo sapiens GN=PAF  
Procollagen-lysine,2-oxoglutarate 5-dioxygenase 2 OS=Homo sapiens GN=PLOD2 PE=4 S  
Integrin alpha-6 (Fragment) OS=Homo sapiens GN=ITGA6 PE=3 SV=1  
Lysosomal protective protein OS=Homo sapiens GN=CTSA PE=1 SV=2  
1-acyl-sn-glycerol-3-phosphate acyltransferase gamma OS=Homo sapiens GN=AGPAT3 PE  
RNA-binding protein Nova-2 OS=Homo sapiens GN=NOVA2 PE=1 SV=1  
Afamin OS=Homo sapiens GN=AFM PE=1 SV=1  
Soluble CD163 OS=Homo sapiens GN=CD163 PE=4 SV=1  
Nuclear pore complex protein Nup205 OS=Homo sapiens GN=NUP205 PE=1 SV=3  
Cathepsin Z OS=Homo sapiens GN=CTSZ PE=1 SV=1  
Histone H1.0 OS=Homo sapiens GN=H1F0 PE=1 SV=3  
Spectrin beta chain, non-erythrocytic 4 OS=Homo sapiens GN=SPTBN4 PE=4 SV=1  
Armadillo repeat protein deleted in velo-cardio-facial syndrome OS=Homo sapiens G  
Dedicator of cytokinesis protein 4 (Fragment) OS=Homo sapiens GN=DOCK4 PE=4 SV=1  
Protein arginine N-methyltransferase 3 OS=Homo sapiens GN=PRMT3 PE=1 SV=3  
Cytochrome b-c1 complex subunit 8 OS=Homo sapiens GN=UQCRQ PE=1 SV=4  
Putative hydroxypyruvate isomerase (Fragment) OS=Homo sapiens GN=HYI PE=4 SV=1  
Elongator complex protein 4 OS=Homo sapiens GN=ELP4 PE=2 SV=1  
High mobility group protein B2 OS=Homo sapiens GN=HMGB2 PE=1 SV=2  
Isoform 2 of PDZ and LIM domain protein 3 OS=Homo sapiens GN=PDLIM3  
Serine dehydratase-like OS=Homo sapiens GN=SDSL PE=1 SV=1  
Protein RCC2 OS=Homo sapiens GN=RCC2 PE=1 SV=2  
Na(+)/H(+) exchange regulatory cofactor NHE-RF2 (Fragment) OS=Homo sapiens GN=SLC  
60S ribosomal protein L30 OS=Homo sapiens GN=RPL30 PE=1 SV=2  
Spermine synthase OS=Homo sapiens GN=SMS PE=2 SV=1  
Atlantin-1 OS=Homo sapiens GN=ATL1 PE=4 SV=1  
Trans-2,3-enoyl-CoA reductase OS=Homo sapiens GN=TECR PE=2 SV=1  
Ankyrin repeat and MYND domain containing 2, isoform CRA\_c OS=Homo sapiens GN=ANK  
Bifunctional coenzyme A synthase OS=Homo sapiens GN=COASY PE=1 SV=4  
Thymopietin OS=Homo sapiens GN=TMPO PE=2 SV=1  
Isoform 2 of Mitochondrial import inner membrane translocase subunit TIM50 OS=Hom  
Prostaglandin E synthase 2 OS=Homo sapiens GN=PTGES2 PE=4 SV=2  
LUC7-like (S. cerevisiae) OS=Homo sapiens GN=LUC7L PE=4 SV=1

Phospholipid scramblase 1 OS=Homo sapiens GN=PLSCR1 PE=2 SV=1  
Uncharacterized protein Clorf198 OS=Homo sapiens GN=Clorf198 PE=4 SV=1  
GMP reductase 2 OS=Homo sapiens GN=GMPR2 PE=3 SV=1  
SUMO-conjugating enzyme UBC9 OS=Homo sapiens GN=UBE2I PE=3 SV=1  
Complement C5 OS=Homo sapiens GN=C5 PE=1 SV=4  
Receptor-type tyrosine-protein phosphatase F OS=Homo sapiens GN=PTPRF PE=1 SV=2  
Enhancer of mRNA-decapping protein 4 OS=Homo sapiens GN=EDC4 PE=1 SV=1  
60S ribosomal protein L34 OS=Homo sapiens GN=RPL34 PE=1 SV=3  
Endophilin-B1 OS=Homo sapiens GN=SH3GLB1 PE=1 SV=1  
mRNA export factor OS=Homo sapiens GN=RAE1 PE=4 SV=1  
Transcription elongation factor B (SIII), polypeptide 2 (18kDa, elongin B), isofo  
Protein SCO1 homolog, mitochondrial OS=Homo sapiens GN=SCO1 PE=4 SV=1  
Isoform 2 of Cytoplasmic dynein 1 intermediate chain 1 OS=Homo sapiens GN=DYNC1I1  
Receptor-type tyrosine-protein phosphatase delta OS=Homo sapiens GN=PTPRD PE=4 SV  
CD63 antigen OS=Homo sapiens GN=CD63 PE=4 SV=1  
Serine/threonine-protein phosphatase 2A 56 kDa regulatory subunit gamma isoform 0  
Coiled-coil domain-containing protein 124 OS=Homo sapiens GN=CCDC124 PE=1 SV=1  
Junctional adhesion molecule C OS=Homo sapiens GN=JAM3 PE=1 SV=1  
Synaptopodin OS=Homo sapiens GN=SYNPO PE=1 SV=2  
MAP/microtubule affinity-regulating kinase 4 OS=Homo sapiens GN=MARK4 PE=1 SV=1  
Transmembrane protein 205 OS=Homo sapiens GN=TMEM205 PE=1 SV=1  
Sideroflexin-5 OS=Homo sapiens GN=SFXN5 PE=2 SV=1  
Protein FAM49A OS=Homo sapiens GN=FAM49A PE=1 SV=1  
Importin subunit alpha OS=Homo sapiens GN=KPNA6 PE=3 SV=1  
60S ribosomal protein L21 OS=Homo sapiens GN=RPL21 PE=1 SV=2  
E3 UFM1-protein ligase 1 OS=Homo sapiens GN=UFL1 PE=1 SV=2  
Long-chain-fatty-acid--CoA ligase 6 OS=Homo sapiens GN=ACSL6 PE=4 SV=1  
Prolyl 4-hydroxylase subunit alpha-1 OS=Homo sapiens GN=P4HA1 PE=4 SV=1  
Lipoamide acyltransferase component of branched-chain alpha-keto acid dehydrogena  
ATP-dependent Clp protease ATP-binding subunit clpX-like, mitochondrial OS=Homo s  
ATPase inhibitor, mitochondrial OS=Homo sapiens GN=ATPIF1 PE=1 SV=1  
Kinesin-like protein KIF2A OS=Homo sapiens GN=KIF2A PE=3 SV=1  
Prefoldin subunit 2 OS=Homo sapiens GN=PFDN2 PE=1 SV=1  
Copper transport protein ATOX1 OS=Homo sapiens GN=ATOX1 PE=4 SV=1  
Signal recognition particle 54 kDa protein OS=Homo sapiens GN=SRP54 PE=1 SV=1  
Optic atrophy 3 protein OS=Homo sapiens GN=OPA3 PE=1 SV=1  
HLA class I histocompatibility antigen, B-56 alpha chain (Fragment) OS=Homo sapie  
Serine/threonine-protein phosphatase (Fragment) OS=Homo sapiens GN=PPP5C PE=3 SV=  
Seizure 6-like protein 2 OS=Homo sapiens GN=SEZ6L2 PE=4 SV=1  
Azurocidin OS=Homo sapiens GN=AZU1 PE=1 SV=3  
60S ribosomal protein L11 (Fragment) OS=Homo sapiens GN=RPL11 PE=2 SV=1  
Hepatoma-derived growth factor-related protein 3 (Fragment) OS=Homo sapiens GN=HD  
Ig heavy chain V-III region BRO OS=Homo sapiens PE=1 SV=1  
Engulfment and cell motility protein 1 OS=Homo sapiens GN=ELM01 PE=1 SV=2  
Rap1 GTPase-activating protein 1 OS=Homo sapiens GN=RAP1GAP PE=4 SV=1  
DNA repair protein RAD50 (Fragment) OS=Homo sapiens GN=RAD50 PE=4 SV=1  
Isoform 2 of Receptor-type tyrosine-protein phosphatase epsilon OS=Homo sapiens G

Leucine-rich repeat-containing protein 59 OS=Homo sapiens GN=LRR59 PE=1 SV=1  
PLEKHA5 protein OS=Homo sapiens GN=PLEKHA5 PE=2 SV=1  
Junctional adhesion molecule B OS=Homo sapiens GN=JAM2 PE=4 SV=1  
Protein TSSC1 OS=Homo sapiens GN=TSSC1 PE=4 SV=2  
Protein SEC13 homolog OS=Homo sapiens GN=SEC13 PE=4 SV=1  
Leucine-rich repeat flightless-interacting protein 2 OS=Homo sapiens GN=LRRFIP2 P  
Guanylate kinase OS=Homo sapiens GN=GUK1 PE=4 SV=1  
Small nuclear ribonucleoprotein-associated protein OS=Homo sapiens GN=SNRPN PE=2  
Engulfment and cell motility protein 2 OS=Homo sapiens GN=ELM2 PE=2 SV=1  
Transforming acidic coiled-coil-containing protein 1 OS=Homo sapiens GN=TACC1 PE=  
Replication protein A 14 kDa subunit OS=Homo sapiens GN=RPA3 PE=4 SV=1  
Calpastatin OS=Homo sapiens GN=CAST PE=2 SV=1  
BRO1 domain-containing protein BROX OS=Homo sapiens GN=Clorf58 PE=2 SV=1  
Glycogen [starch] synthase, muscle (Fragment) OS=Homo sapiens GN=GYS1 PE=4 SV=1  
Selenocysteine-specific elongation factor OS=Homo sapiens GN=EEFSEC PE=4 SV=1  
Protein BUD31 homolog OS=Homo sapiens GN=BUD31 PE=4 SV=1  
Protein FAM54B (Fragment) OS=Homo sapiens GN=FAM54B PE=4 SV=1  
Echinoderm microtubule-associated protein-like 2 OS=Homo sapiens GN=EML2 PE=4 SV=  
Synaptophysin-like protein 1 OS=Homo sapiens GN=SYPL1 PE=4 SV=1  
Complement C1q subcomponent subunit B OS=Homo sapiens GN=C1QB PE=4 SV=1  
Cytochrome b5 type B OS=Homo sapiens GN=CYB5B PE=3 SV=1  
Carboxypeptidase Q (Fragment) OS=Homo sapiens GN=CPQ PE=4 SV=1  
Aggrecan core protein OS=Homo sapiens GN=ACAN PE=4 SV=2  
ATP-binding cassette sub-family D member 3 OS=Homo sapiens GN=ABCD3 PE=3 SV=1  
NADH dehydrogenase [ubiquinone] 1 beta subcomplex subunit 5, mitochondrial OS=Hom  
Ubiquitin-like modifier-activating enzyme ATG7 OS=Homo sapiens GN=ATG7 PE=4 SV=1  
Neurolysin, mitochondrial OS=Homo sapiens GN=NLN PE=3 SV=1  
D-beta-hydroxybutyrate dehydrogenase, mitochondrial OS=Homo sapiens GN=BDH1 PE=3  
Protein O-GlcNAcase OS=Homo sapiens GN=MGEA5 PE=4 SV=1  
60S ribosomal protein L8 OS=Homo sapiens GN=RPL8 PE=4 SV=1  
Vacuolar protein sorting-associated protein 51 homolog (Fragment) OS=Homo sapiens  
Methylosome subunit pICln OS=Homo sapiens GN=CLNS1A PE=4 SV=1  
Parkinson disease 7 domain-containing protein 1 OS=Homo sapiens GN=PDDC1 PE=4 SV=  
tRNA methyltransferase 112 homolog OS=Homo sapiens GN=TRMT112 PE=4 SV=1  
Acyl-coenzyme A thioesterase 13 OS=Homo sapiens GN=ACOT13 PE=4 SV=1  
Tumor susceptibility gene 101 protein OS=Homo sapiens GN=TSG101 PE=4 SV=1  
Serum paraoxonase/arylesterase 1 OS=Homo sapiens GN=PON1 PE=4 SV=1  
NADH dehydrogenase [ubiquinone] 1 alpha subcomplex subunit 12 OS=Homo sapiens GN=  
60S ribosomal protein L6 (Fragment) OS=Homo sapiens GN=RPL6 PE=3 SV=1  
Torsin-1A-interacting protein 1 (Fragment) OS=Homo sapiens GN=TOR1AIP1 PE=4 SV=1  
Diphosphomevalonate decarboxylase (Fragment) OS=Homo sapiens GN=MVD PE=4 SV=1  
Glutathione S-transferase theta-1 (Fragment) OS=Homo sapiens GN=GSTT1 PE=4 SV=1  
Serrate RNA effector molecule homolog (Fragment) OS=Homo sapiens GN=SRRT PE=4 SV=  
Thioredoxin domain-containing protein 17 OS=Homo sapiens GN=TXNDC17 PE=4 SV=1  
Phosphatidylinositol 4-kinase alpha OS=Homo sapiens GN=PI4KA PE=4 SV=1  
60S ribosomal protein L38 (Fragment) OS=Homo sapiens GN=RPL38 PE=3 SV=1  
Unconventional myosin-If OS=Homo sapiens GN=MYO1F PE=1 SV=3

Nucleolar protein 56 OS=Homo sapiens GN=NOP56 PE=1 SV=4  
Lipid phosphate phosphohydrolase 1 OS=Homo sapiens GN=PPAP2A PE=1 SV=1  
Regulator of G-protein signaling 10 OS=Homo sapiens GN=RGS10 PE=1 SV=2  
DnaJ homolog subfamily C member 13 OS=Homo sapiens GN=DNAJC13 PE=1 SV=5  
Phosphatidate cytidyltransferase 2 OS=Homo sapiens GN=CDS2 PE=1 SV=1  
Ig kappa chain V-I region CAR OS=Homo sapiens PE=1 SV=1  
Ig kappa chain V-IV region Len OS=Homo sapiens PE=1 SV=2  
Replication protein A 32 kDa subunit OS=Homo sapiens GN=RPA2 PE=1 SV=1  
DNA-directed RNA polymerases I, II, and III subunit RPABC1 OS=Homo sapiens GN=POL  
Serum amyloid A-4 protein OS=Homo sapiens GN=SAA4 PE=1 SV=2  
60S ribosomal protein L29 OS=Homo sapiens GN=RPL29 PE=1 SV=2  
Glutamate--cysteine ligase regulatory subunit OS=Homo sapiens GN=GCLM PE=1 SV=1  
Proteolipid protein 2 OS=Homo sapiens GN=PLP2 PE=1 SV=1  
Cullin-3 OS=Homo sapiens GN=CUL3 PE=1 SV=2  
Eukaryotic translation initiation factor 4H OS=Homo sapiens GN=EIF4H PE=1 SV=5  
RNA binding protein, autoantigenic (HnRNP-associated with lethal yellow homolog (Cell adhesion molecule 3 OS=Homo sapiens GN=CADM3 PE=1 SV=1  
Protein canopy homolog 4 OS=Homo sapiens GN=CNPY4 PE=2 SV=1  
Osteoclast-stimulating factor 1 OS=Homo sapiens GN=OSTF1 PE=1 SV=2  
Sortilin OS=Homo sapiens GN=SORT1 PE=1 SV=3  
Coronin-1B OS=Homo sapiens GN=CORO1B PE=1 SV=1  
Synaptotagmin-11 OS=Homo sapiens GN=SYT11 PE=1 SV=2  
Fibronectin type III and SPRY domain-containing protein 1 OS=Homo sapiens GN=FSD1  
GrpE protein homolog 1, mitochondrial OS=Homo sapiens GN=GRPEL1 PE=1 SV=2  
Translation initiation factor eIF-2B subunit gamma OS=Homo sapiens GN=EIF2B3 PE=1  
Poly(ADP-ribose) glycohydrolase ARH3 OS=Homo sapiens GN=ADPRHL2 PE=1 SV=1  
C-type mannose receptor 2 OS=Homo sapiens GN=MRC2 PE=1 SV=2  
Protein NipSnap homolog 3A OS=Homo sapiens GN=NIPSNAP3A PE=1 SV=2  
Neudesin OS=Homo sapiens GN=NENF PE=1 SV=1  
UPF0568 protein C14orf166 OS=Homo sapiens GN=C14orf166 PE=1 SV=1  
Coiled-coil domain-containing protein 22 OS=Homo sapiens GN=CCDC22 PE=1 SV=1  
Mitochondrial import inner membrane translocase subunit Tim13 OS=Homo sapiens GN=  
Endothelin B receptor-like protein 2 OS=Homo sapiens GN=GPR37L1 PE=1 SV=2  
Ig lambda chain V region 4A OS=Homo sapiens PE=4 SV=1  
COMM domain containing 6 OS=Homo sapiens GN=COMMD6 PE=4 SV=1  
2-aminoethanethiol dioxygenase OS=Homo sapiens GN=ADO PE=1 SV=2  
Ig kappa chain V-I region AG OS=Homo sapiens PE=1 SV=1  
Leucine-rich repeat and calponin homology domain-containing protein 3 OS=Homo sap  
Spartin OS=Homo sapiens GN=SPG20 PE=1 SV=1  
Ewing sarcoma breakpoint region 1 OS=Homo sapiens GN=EWSR1 PE=4 SV=1  
Sickle tail protein homolog OS=Homo sapiens GN=KIAA1217 PE=4 SV=2  
Aspartyl/asparaginyl beta-hydroxylase OS=Homo sapiens GN=ASPH PE=4 SV=1  
Dolichol-phosphate mannosyltransferase subunit 3 OS=Homo sapiens GN=DPM3 PE=1 SV=  
Small nuclear ribonucleoprotein E OS=Homo sapiens GN=SNRPE PE=4 SV=1  
Tubulin tyrosine ligase-like family, member 12 OS=Homo sapiens GN=TTLL12 PE=4 SV=  
Parathymosin OS=Homo sapiens GN=PTMS PE=4 SV=1  
Ig lambda chain V-I region HA OS=Homo sapiens PE=1 SV=1

Trafficking protein particle complex 3, isoform CRA\_a OS=Homo sapiens GN=TRAPPC3  
A kinase (PRKA) anchor protein 13, isoform CRA\_a OS=Homo sapiens GN=AKAP13 PE=4 S  
Golgi reassembly-stacking protein 2 OS=Homo sapiens GN=GORASP2 PE=2 SV=1  
UPF0452 protein C7orf41 (Fragment) OS=Homo sapiens GN=C7orf41 PE=4 SV=1  
Serum amyloid P-component OS=Homo sapiens GN=APCS PE=1 SV=2  
Cytochrome b-c1 complex subunit 9 OS=Homo sapiens GN=UQCR10 PE=1 SV=3  
Coiled-coil domain-containing protein 58 OS=Homo sapiens GN=CCDC58 PE=4 SV=1  
G-protein-coupled receptor family C group 5 member B OS=Homo sapiens GN=GPRC5B PE  
NEDD8-activating enzyme E1 regulatory subunit OS=Homo sapiens GN=NAE1 PE=4 SV=2  
Allograft inflammatory factor 1 OS=Homo sapiens GN=AIF1 PE=1 SV=1  
Urea transporter 1 OS=Homo sapiens GN=SLC14A1 PE=2 SV=2  
Caveolin (Fragment) OS=Homo sapiens GN=CAV1 PE=3 SV=1  
Inositol 1,4,5-trisphosphate receptor type 1 OS=Homo sapiens GN=ITPR1 PE=4 SV=2  
Cleavage and polyadenylation specificity factor subunit 1 OS=Homo sapiens GN=CPSF  
Synaptogyrin 1 OS=Homo sapiens GN=SYNGR1 PE=4 SV=1  
Synaptogyrin-3 OS=Homo sapiens GN=SYNGR3 PE=4 SV=1  
EH domain-containing protein 4 OS=Homo sapiens GN=EHD4 PE=1 SV=1  
Hippocalcin-like protein 1 OS=Homo sapiens GN=HPCAL1 PE=1 SV=3  
Phosphatidylinositol 5-phosphate 4-kinase type-2 beta OS=Homo sapiens GN=PIP4K2B  
Serine/arginine-rich-splicing factor 5 OS=Homo sapiens GN=SRSF5 PE=2 SV=1  
Pterin-4-alpha-carbinolamine dehydratase 2 (Fragment) OS=Homo sapiens GN=PCBD2 PE  
Heterogeneous nuclear ribonucleoprotein L-like OS=Homo sapiens GN=HNRPLL PE=4 SV=  
AFG3-like protein 2 OS=Homo sapiens GN=AFG3L2 PE=1 SV=2  
Ras-related protein Rab-35 (Fragment) OS=Homo sapiens GN=RAB35 PE=3 SV=1  
DmX-like protein 2 OS=Homo sapiens GN=DMXL2 PE=4 SV=1  
Protein NDRG3 OS=Homo sapiens GN=NDRG3 PE=2 SV=1  
Beta-2-syntrophin OS=Homo sapiens GN=SNTB2 PE=1 SV=1  
Probable Xaa-Pro aminopeptidase 3 OS=Homo sapiens GN=XPNPEP3 PE=1 SV=1  
Ig heavy chain V-III region GAL OS=Homo sapiens PE=1 SV=1  
UDP-N-acetylhexosamine pyrophosphorylase OS=Homo sapiens GN=UAP1 PE=1 SV=3  
Serine/threonine-protein kinase 3 OS=Homo sapiens GN=STK3 PE=2 SV=1  
Protein diaphanous homolog 1 OS=Homo sapiens GN=DIAPH1 PE=2 SV=1  
Gamma-interferon-inducible lysosomal thiol reductase OS=Homo sapiens GN=IFI30 PE=  
Integrin alpha-2 OS=Homo sapiens GN=ITGA2 PE=3 SV=1  
1-phosphatidylinositol 4,5-bisphosphate phosphodiesterase gamma-1 OS=Homo sapiens  
2',5'-phosphodiesterase 12 OS=Homo sapiens GN=PDE12 PE=4 SV=1  
Chymase OS=Homo sapiens GN=CMA1 PE=1 SV=1  
La-related protein 1 OS=Homo sapiens GN=LARP1 PE=1 SV=2  
Growth arrest-specific protein 7 OS=Homo sapiens GN=GAS7 PE=2 SV=1  
Proteasome (Prosome, macropain) subunit, beta type, 9 (Large multifunctional pept  
RAB3GAP1 protein OS=Homo sapiens GN=RAB3GAP1 PE=2 SV=1  
Coatomer protein complex, subunit epsilon, isoform CRA\_e OS=Homo sapiens GN=COPE  
Protein SET OS=Homo sapiens GN=SET PE=2 SV=2  
Putative Golgi pH regulator C OS=Homo sapiens GN=GPR89C PE=5 SV=2  
Adaptin ear-binding coat-associated protein 1 OS=Homo sapiens GN=NECAP1 PE=2 SV=1  
Protein FAM98B OS=Homo sapiens GN=FAM98B PE=4 SV=1  
Cat eye syndrome critical region protein 5 OS=Homo sapiens GN=CECR5 PE=4 SV=1



Serine/arginine repetitive matrix 1 OS=Homo sapiens GN=SRRM1 PE=4 SV=1  
Periostin OS=Homo sapiens GN=POSTN PE=4 SV=1  
Rho guanine nucleotide exchange factor (GEF) 7 OS=Homo sapiens GN=ARHGEF7 PE=4 SV=1  
Epidermal growth factor receptor pathway substrate 15 OS=Homo sapiens GN=EPS15 PE=4 SV=1  
ICSU OS=Homo sapiens GN=ISCU PE=2 SV=1  
Ran-binding protein 9 OS=Homo sapiens GN=RANBP9 PE=2 SV=1  
SUMO-1 activating enzyme subunit 1, isoform CRA\_a OS=Homo sapiens GN=SAE1 PE=2 SV=1  
Eukaryotic translation initiation factor 3 subunit F OS=Homo sapiens GN=EIF3F PE=4 SV=1  
Coronin OS=Homo sapiens GN=CORO7 PE=2 SV=1  
CUGBP Elav-like family member 2 OS=Homo sapiens GN=CELF2 PE=2 SV=1  
F-box only protein 17 OS=Homo sapiens GN=FBXO17 PE=2 SV=1  
Chromosome 2 open reading frame 18, isoform CRA\_c OS=Homo sapiens GN=C2orf18 PE=2 SV=1  
Mitochondrial dicarboxylate carrier OS=Homo sapiens GN=SLC25A10 PE=2 SV=1  
Methylosome protein 50 OS=Homo sapiens GN=WDR77 PE=2 SV=1  
Far upstream element-binding protein 1 OS=Homo sapiens GN=FUBP1 PE=2 SV=1  
Serine/arginine-rich-splicing factor 11 OS=Homo sapiens GN=SRSF11 PE=2 SV=1  
Methionine aminopeptidase OS=Homo sapiens GN=METAP2 PE=2 SV=1  
26S proteasome non-ATPase regulatory subunit 5 OS=Homo sapiens GN=PSMD5 PE=2 SV=1  
Ribulose-phosphate 3-epimerase OS=Homo sapiens GN=RPE PE=2 SV=1  
Soluble Alc-alpha OS=Homo sapiens GN=CLSTN1 PE=2 SV=1  
Glutathione S-transferase theta-2 OS=Homo sapiens GN=GSTT2 PE=4 SV=2  
HCG2043423, isoform CRA\_a OS=Homo sapiens GN=ATP6V1G2 PE=4 SV=1  
Tryptophan--tRNA ligase, mitochondrial OS=Homo sapiens GN=WARS2 PE=2 SV=1  
Cytosolic Fe-S cluster assembly factor NUBP2 OS=Homo sapiens GN=NUBP2 PE=2 SV=1  
Glutamate receptor delta-1 subunit OS=Homo sapiens GN=GRID1 PE=2 SV=1  
Monoglyceride lipase OS=Homo sapiens GN=MGLL PE=2 SV=1  
Hyccin OS=Homo sapiens GN=FAM126A PE=4 SV=1  
Integral membrane protein 2C OS=Homo sapiens GN=ITM2C PE=4 SV=2  
Elongation factor G, mitochondrial OS=Homo sapiens GN=GFM1 PE=4 SV=1  
Rho GTPase-activating protein 17 (Fragment) OS=Homo sapiens GN=ARHGAP17 PE=4 SV=3  
Lanosterol synthase (Fragment) OS=Homo sapiens GN=LSS PE=4 SV=1  
Beta-galactosidase (Fragment) OS=Homo sapiens GN=GLB1 PE=4 SV=1  
Ubiquitin-like modifier-activating enzyme 5 (Fragment) OS=Homo sapiens GN=UBA5 PE=4 SV=1  
Synaptosomal-associated protein (Fragment) OS=Homo sapiens GN=SNAP29 PE=3 SV=1  
Phosphoserine phosphatase (Fragment) OS=Homo sapiens GN=PSPH PE=4 SV=1  
Secernin-3 (Fragment) OS=Homo sapiens GN=SCRN3 PE=4 SV=1  
Acylamino-acid-releasing enzyme OS=Homo sapiens GN=APEH PE=4 SV=1  
STAM-binding protein (Fragment) OS=Homo sapiens GN=STAMPB PE=4 SV=1  
L-2-hydroxyglutarate dehydrogenase, mitochondrial OS=Homo sapiens GN=L2HGDH PE=4 SV=1  
Neurologin 1 OS=Homo sapiens GN=nlgn1 PE=2 SV=1  
40S ribosomal protein S23 OS=Homo sapiens GN=RPS23 PE=3 SV=1  
Dynactin subunit 6 OS=Homo sapiens GN=DCTN6 PE=4 SV=1  
Eukaryotic translation initiation factor 3 subunit E (Fragment) OS=Homo sapiens GN=EIF3E PE=4 SV=1  
Serine/threonine-protein phosphatase 2A 55 kDa regulatory subunit B alpha isoform  
Protein LYRIC OS=Homo sapiens GN=MTDH PE=4 SV=1  
Apoptotic chromatin condensation inducer in the nucleus OS=Homo sapiens GN=ACIN1 PE=4 SV=1  
Mitochondrial-processing peptidase subunit beta OS=Homo sapiens GN=PMPCB PE=3 SV=1

Nucleolysin TIAR (Fragment) OS=Homo sapiens GN=TIAL1 PE=4 SV=1  
Stromal membrane-associated protein 1 OS=Homo sapiens GN=SMAP1 PE=4 SV=1  
Anoctamin OS=Homo sapiens GN=ANO6 PE=3 SV=1  
THO complex subunit 4 OS=Homo sapiens GN=ALYREF PE=4 SV=1  
Suprabasin OS=Homo sapiens GN=SBSN PE=4 SV=1  
DNA topoisomerase 2 (Fragment) OS=Homo sapiens GN=TOP2B PE=3 SV=1  
Apolipoprotein L1 OS=Homo sapiens GN=APOL1 PE=4 SV=1  
7-dehydrocholesterol reductase (Fragment) OS=Homo sapiens GN=DHCR7 PE=4 SV=1  
Acyl-coenzyme A thioesterase 8 OS=Homo sapiens GN=ACOT8 PE=4 SV=1  
Signal recognition particle receptor subunit alpha OS=Homo sapiens GN=SRPR PE=4 SV=1  
GDP-L-fucose synthase (Fragment) OS=Homo sapiens GN=TSTA3 PE=4 SV=1  
Phosphatidylinositol-binding clathrin assembly protein OS=Homo sapiens GN=PICALM  
Eukaryotic translation initiation factor 3 subunit M (Fragment) OS=Homo sapiens GN=EIF3M  
Stromal interaction molecule 1 OS=Homo sapiens GN=STIM1 PE=4 SV=1  
Poly(U)-binding-splicing factor PUF60 (Fragment) OS=Homo sapiens GN=PUF60 PE=4 SV=1  
Probable asparagine--tRNA ligase, mitochondrial (Fragment) OS=Homo sapiens GN=NARL  
Vacuolar protein sorting-associated protein 26B OS=Homo sapiens GN=VPS26B PE=4 SV=1  
Oligoribonuclease, mitochondrial OS=Homo sapiens GN=REXO2 PE=4 SV=1  
Diablo homolog, mitochondrial (Fragment) OS=Homo sapiens GN=DIABLO PE=4 SV=1  
Complement component C8 beta chain OS=Homo sapiens GN=C8B PE=4 SV=1  
Vacuolar protein sorting-associated protein 45 OS=Homo sapiens GN=VPS45 PE=4 SV=1  
Ubiquitin thioesterase OTUB1 OS=Homo sapiens GN=OTUB1 PE=4 SV=1  
N-acylneuraminate cytidyltransferase (Fragment) OS=Homo sapiens GN=CMAS PE=4 SV=1  
ELKS/Rab6-interacting/CAST family member 1 OS=Homo sapiens GN=ERC1 PE=4 SV=1  
Kinase suppressor of Ras 1 OS=Homo sapiens GN=KSR1 PE=4 SV=1  
Oligophrenin-1 OS=Homo sapiens GN=OPHN1 PE=4 SV=1  
N-sulphoglucosamine sulphohydrolase OS=Homo sapiens GN=SGSH PE=4 SV=1  
Epimerase family protein SDR39U1 OS=Homo sapiens GN=SDR39U1 PE=4 SV=1  
2-methoxy-6-polyprenyl-1,4-benzoquinol methylase, mitochondrial (Fragment) OS=Homo sapiens GN=HVCN1 PE=4 SV=1  
Voltage-gated hydrogen channel 1 OS=Homo sapiens GN=HVCN1 PE=4 SV=1  
Lysozyme C OS=Homo sapiens GN=LYZ PE=3 SV=1  
Iron-sulfur protein NUBPL (Fragment) OS=Homo sapiens GN=NUBPL PE=4 SV=1  
GMP synthase [glutamine-hydrolyzing] OS=Homo sapiens GN=GMPS PE=4 SV=1  
Golgi integral membrane protein 4 OS=Homo sapiens GN=GOLIM4 PE=4 SV=1  
Exocyst complex component 5 OS=Homo sapiens GN=EXOC5 PE=4 SV=1  
Abhydrolase domain-containing protein 14B OS=Homo sapiens GN=ABHD14B PE=4 SV=1  
Polyribonucleotide nucleotidyltransferase 1, mitochondrial OS=Homo sapiens GN=PNP2  
Developmentally-regulated GTP-binding protein 1 OS=Homo sapiens GN=DRG1 PE=4 SV=1  
Integrin alpha-7 light chain (Fragment) OS=Homo sapiens GN=ITGA7 PE=4 SV=1  
SRA stem-loop-interacting RNA-binding protein, mitochondrial OS=Homo sapiens GN=SRP  
Myotubularin-related protein 5 OS=Homo sapiens GN=SBF1 PE=4 SV=1  
Immunoglobulin superfamily member 21 (Fragment) OS=Homo sapiens GN=IGSF21 PE=4 SV=1  
Mitochondrial carrier homolog 1 (Fragment) OS=Homo sapiens GN=MTCH1 PE=3 SV=1  
Protein C6orf108 (Fragment) OS=Homo sapiens GN=C6orf108 PE=4 SV=1  
Ribonucleoside-diphosphate reductase subunit M2 B (Fragment) OS=Homo sapiens GN=RDR  
Protein DDI1 homolog 2 (Fragment) OS=Homo sapiens GN=DDI2 PE=4 SV=1  
Dehydrogenase/reductase SDR family member 7 (Fragment) OS=Homo sapiens GN=DHRS7 P

Pro-interleukin-16 (Fragment) OS=Homo sapiens GN=IL16 PE=4 SV=2  
U2 small nuclear ribonucleoprotein A' (Fragment) OS=Homo sapiens GN=SNRPA1 PE=4 SV=1  
WD repeat-containing protein 61 OS=Homo sapiens GN=WDR61 PE=4 SV=1  
Dynactin subunit 5 OS=Homo sapiens GN=DCTN5 PE=4 SV=1  
E3 ubiquitin-protein ligase ARIH1 (Fragment) OS=Homo sapiens GN=ARIH1 PE=4 SV=1  
Nucleoside diphosphate kinase OS=Homo sapiens GN=NME3 PE=3 SV=1  
Uncharacterized protein OS=Homo sapiens PE=4 SV=1  
Melanoma-associated antigen D2 OS=Homo sapiens GN=MAGED2 PE=4 SV=1  
Methionine adenosyltransferase 2 subunit beta (Fragment) OS=Homo sapiens GN=MAT2B  
NADH dehydrogenase [ubiquinone] 1 beta subcomplex subunit 2, mitochondrial (Fragment)  
Uncharacterized protein OS=Homo sapiens PE=4 SV=1  
Leucine carboxyl methyltransferase 1 (Fragment) OS=Homo sapiens GN=LCMT1 PE=4 SV=1  
Antibacterial protein LL-37 OS=Homo sapiens GN=CAMP PE=4 SV=1  
Lymphocyte antigen 6H OS=Homo sapiens GN=LY6H PE=4 SV=1  
Dehydrogenase/reductase SDR family member 7B (Fragment) OS=Homo sapiens GN=DHRS7B  
Ribosomal protein L19 OS=Homo sapiens GN=RPL19 PE=3 SV=1  
Syntaxin-binding protein 3 OS=Homo sapiens GN=STXBP3 PE=1 SV=2  
Agrin OS=Homo sapiens GN=AGRN PE=1 SV=4  
Programmed cell death protein 5 OS=Homo sapiens GN=PDCD5 PE=1 SV=3  
Tax1-binding protein 3 OS=Homo sapiens GN=TAX1BP3 PE=1 SV=2  
Secretory carrier-associated membrane protein 1 OS=Homo sapiens GN=SCAMP1 PE=1 SV=1  
Neurosecretory protein VGF OS=Homo sapiens GN=VGF PE=1 SV=2  
ER membrane protein complex subunit 8 OS=Homo sapiens GN=EMC8 PE=1 SV=1  
Striatin OS=Homo sapiens GN=STRN PE=1 SV=4  
Retinal rod rhodopsin-sensitive cGMP 3',5'-cyclic phosphodiesterase subunit delta  
Mitochondrial import inner membrane translocase subunit Tim8 A OS=Homo sapiens GN=TIM8A  
28S ribosomal protein S14, mitochondrial OS=Homo sapiens GN=MRPS14 PE=1 SV=1  
NADH dehydrogenase [ubiquinone] 1 beta subcomplex subunit 1 OS=Homo sapiens GN=ND1  
Cytokine receptor-like factor 1 OS=Homo sapiens GN=CRLF1 PE=1 SV=1  
Vesicle-associated membrane protein 5 OS=Homo sapiens GN=VAMP5 PE=1 SV=1  
Myelin protein zero-like protein 1 OS=Homo sapiens GN=MPZL1 PE=1 SV=1  
Ig delta chain C region OS=Homo sapiens GN=IGHD PE=1 SV=2  
Apolipoprotein C-II OS=Homo sapiens GN=APOC2 PE=1 SV=1  
Complement C1q subcomponent subunit A OS=Homo sapiens GN=C1QA PE=1 SV=2  
Metallothionein-2 OS=Homo sapiens GN=MT2A PE=1 SV=1  
Alkaline phosphatase, tissue-nonspecific isozyme OS=Homo sapiens GN=ALPL PE=1 SV=1  
Intercellular adhesion molecule 1 OS=Homo sapiens GN=ICAM1 PE=1 SV=2  
Complement component C8 alpha chain OS=Homo sapiens GN=C8A PE=1 SV=2  
Complement component C8 gamma chain OS=Homo sapiens GN=C8G PE=1 SV=3  
U1 small nuclear ribonucleoprotein 70 kDa OS=Homo sapiens GN=SNRNP70 PE=1 SV=2  
Secretogranin-2 OS=Homo sapiens GN=SCG2 PE=1 SV=2  
Integrin beta-4 OS=Homo sapiens GN=ITGB4 PE=1 SV=5  
Tubulin gamma-1 chain OS=Homo sapiens GN=TUBG1 PE=1 SV=2  
Protein S100-A4 OS=Homo sapiens GN=S100A4 PE=1 SV=1  
Glutaredoxin-1 OS=Homo sapiens GN=GLRX PE=1 SV=2  
Alpha-taxilin OS=Homo sapiens GN=TXLNA PE=1 SV=3  
Tyrosine-protein kinase CSK OS=Homo sapiens GN=CSK PE=1 SV=1

Cell surface glycoprotein MUC18 OS=Homo sapiens GN=MCAM PE=1 SV=2  
Heat shock 70 kDa protein 13 OS=Homo sapiens GN=HSPA13 PE=1 SV=1  
Emerin OS=Homo sapiens GN=EMD PE=1 SV=1  
Serpin B9 OS=Homo sapiens GN=SERPINB9 PE=1 SV=1  
Sulfite oxidase, mitochondrial OS=Homo sapiens GN=SUOX PE=1 SV=2  
Vesicle-associated membrane protein 7 OS=Homo sapiens GN=VAMP7 PE=1 SV=3  
Delta-1-pyrroline-5-carboxylate synthase OS=Homo sapiens GN=ALDH18A1 PE=1 SV=2  
Nucleoside diphosphate kinase homolog 5 OS=Homo sapiens GN=NME5 PE=1 SV=1  
Hormone-sensitive lipase OS=Homo sapiens GN=LIPE PE=1 SV=4  
3-ketodihydrosphingosine reductase OS=Homo sapiens GN=KDSR PE=1 SV=1  
Amidophosphoribosyltransferase OS=Homo sapiens GN=PPAT PE=1 SV=1  
Acetyl-CoA carboxylase 1 OS=Homo sapiens GN=ACACA PE=1 SV=2  
Methylglutaconyl-CoA hydratase, mitochondrial OS=Homo sapiens GN=AUH PE=1 SV=1  
Zinc transporter ZIP14 OS=Homo sapiens GN=SLC39A14 PE=1 SV=3  
Surfeit locus protein 1 OS=Homo sapiens GN=SURF1 PE=1 SV=1  
TGF-beta-activated kinase 1 and MAP3K7-binding protein 1 OS=Homo sapiens GN=TAB1  
AP2-associated protein kinase 1 OS=Homo sapiens GN=AAK1 PE=1 SV=3  
Vacuolar ATPase assembly integral membrane protein VMA21 OS=Homo sapiens GN=VMA21  
Quinone oxidoreductase PIG3 OS=Homo sapiens GN=TP53I3 PE=1 SV=2  
PDZ domain-containing protein 11 OS=Homo sapiens GN=PDZD11 PE=1 SV=2  
Cytochrome c oxidase protein 20 homolog OS=Homo sapiens GN=COX20 PE=1 SV=2  
Cartilage acidic protein 1 (Fragment) OS=Homo sapiens GN=CRTAC1 PE=2 SV=1  
E3 ubiquitin-protein ligase UBR4 OS=Homo sapiens GN=UBR4 PE=1 SV=1  
CD276 antigen OS=Homo sapiens GN=CD276 PE=1 SV=1  
Calcium-binding mitochondrial carrier protein SCaMC-2 OS=Homo sapiens GN=SLC25A25  
Tetratricopeptide repeat protein 37 OS=Homo sapiens GN=TTC37 PE=1 SV=1  
Aspartate--tRNA ligase, mitochondrial OS=Homo sapiens GN=DARS2 PE=1 SV=1  
Zinc transporter 9 OS=Homo sapiens GN=SLC30A9 PE=1 SV=1  
3-hydroxyacyl-CoA dehydratase 2 OS=Homo sapiens GN=PTPLB PE=1 SV=1  
Protein phosphatase 1 regulatory subunit 21 OS=Homo sapiens GN=PPP1R21 PE=1 SV=1  
ATP-binding cassette sub-family F member 2 OS=Homo sapiens GN=ABCF2 PE=2 SV=1  
Amyloid beta A4 precursor protein-binding family B member 1-interacting protein 0  
Fermitin family homolog 3 OS=Homo sapiens GN=FERMT3 PE=1 SV=1  
Potassium intermediate/small conductance calcium-activated channel, subfamily N,  
WAS protein family, member 3, isoform CRA\_a OS=Homo sapiens GN=WASF3 PE=2 SV=1  
Endophilin-A3 OS=Homo sapiens GN=SH3GL3 PE=2 SV=1  
WD repeat-containing protein 16 OS=Homo sapiens GN=WDR16 PE=1 SV=3  
1-phosphatidylinositol 4,5-bisphosphate phosphodiesterase delta-3 OS=Homo sapiens  
Minor histocompatibility antigen H13 OS=Homo sapiens GN=HM13 PE=1 SV=1  
D-tyrosyl-tRNA(Tyr) deacylase 1 OS=Homo sapiens GN=DTD1 PE=1 SV=2  
Palladin OS=Homo sapiens GN=PALLD PE=1 SV=3  
Protein phosphatase 1E OS=Homo sapiens GN=PPM1E PE=1 SV=2  
Immunity-related GTPase family Q protein OS=Homo sapiens GN=IRGQ PE=1 SV=1  
Estradiol 17-beta-dehydrogenase 8 OS=Homo sapiens GN=HSD17B8 PE=1 SV=2  
Tetratricopeptide repeat protein 9A OS=Homo sapiens GN=TTC9 PE=2 SV=3  
UPF0556 protein C19orf10 OS=Homo sapiens GN=C19orf10 PE=1 SV=1  
Nicalin OS=Homo sapiens GN=NCLN PE=1 SV=2

Zinc finger protein 428 OS=Homo sapiens GN=ZNF428 PE=1 SV=2  
Nucleoporin SEH1 OS=Homo sapiens GN=SEH1L PE=1 SV=3  
Mannose-1-phosphate guanyltransferase alpha OS=Homo sapiens GN=GMPPA PE=1 SV=1  
Exocyst complex component 2 OS=Homo sapiens GN=EXOC2 PE=1 SV=1  
Dehydrogenase/reductase SDR family member 1 OS=Homo sapiens GN=DHRS1 PE=1 SV=1  
Actin-related protein 2/3 complex subunit 5-like protein OS=Homo sapiens GN=ARPC5  
O-acetyl-ADP-ribose deacetylase MACROD1 OS=Homo sapiens GN=MACROD1 PE=1 SV=2  
KxDL motif-containing protein 1 OS=Homo sapiens GN=KXD1 PE=1 SV=2  
Protein syndesmos OS=Homo sapiens GN=NUDT16L1 PE=1 SV=1  
Uncharacterized protein C19orf52 OS=Homo sapiens GN=C19orf52 PE=1 SV=2  
UPF0368 protein Cxorf26 OS=Homo sapiens GN=CXorf26 PE=1 SV=1  
Transmembrane protein 120A OS=Homo sapiens GN=TMEM120A PE=2 SV=1  
Ubiquitin-conjugating enzyme E2 0 OS=Homo sapiens GN=UBE20 PE=1 SV=3  
Tubulointerstitial nephritis antigen-like OS=Homo sapiens GN=TINAGL1 PE=1 SV=1  
UPF0687 protein C20orf27 OS=Homo sapiens GN=C20orf27 PE=1 SV=3  
Rabenosyn-5 OS=Homo sapiens GN=ZFYVE20 PE=1 SV=2  
MIP18 family protein FAM96A OS=Homo sapiens GN=FAM96A PE=1 SV=1  
Plasminogen receptor (KT) OS=Homo sapiens GN=PLGRKT PE=1 SV=1  
Mitochondrial import receptor subunit TOM22 homolog OS=Homo sapiens GN=TOMM22 PE=  
DnaJ homolog subfamily B member 4 OS=Homo sapiens GN=DNAJB4 PE=1 SV=1  
Ras-related protein Rab-23 OS=Homo sapiens GN=RAB23 PE=1 SV=1  
Intercellular adhesion molecule 5 OS=Homo sapiens GN=ICAM5 PE=1 SV=3  
Regulator complex protein LAMTOR2 OS=Homo sapiens GN=LAMTOR2 PE=1 SV=1  
U6 snRNA-associated Sm-like protein LSM2 OS=Homo sapiens GN=LSM2 PE=1 SV=1  
Coatmer subunit gamma-1 OS=Homo sapiens GN=COPG1 PE=1 SV=1  
Coiled-coil-helix-coiled-coil-helix domain-containing protein 2, mitochondrial OS  
Kinesin-like protein KIF1A OS=Homo sapiens GN=KIF1A PE=3 SV=1  
Pleckstrin homology-like domain family B member 1 OS=Homo sapiens GN=PHLDB1 PE=1  
Serine/threonine-protein kinase TBK1 (Fragment) OS=Homo sapiens GN=TBK1 PE=4 SV=1  
Protein RER1 OS=Homo sapiens GN=RER1 PE=1 SV=1  
Krev interaction trapped protein 1 (Fragment) OS=Homo sapiens GN=KRIT1 PE=4 SV=1  
TBC1 domain family member 15 OS=Homo sapiens GN=TBC1D15 PE=2 SV=1  
High mobility group protein HMG-I/HMG-Y OS=Homo sapiens GN=HMGA1 PE=4 SV=1  
Importin subunit alpha-3 OS=Homo sapiens GN=KPNA3 PE=1 SV=2  
Cullin-5 OS=Homo sapiens GN=CUL5 PE=1 SV=4  
Uncharacterized protein (Fragment) OS=Homo sapiens PE=4 SV=1  
Dynein light chain Tctex-type 1 OS=Homo sapiens GN=DYNLT1 PE=1 SV=1  
Translocation protein SEC63 homolog OS=Homo sapiens GN=SEC63 PE=1 SV=2  
5'-AMP-activated protein kinase catalytic subunit alpha-2 OS=Homo sapiens GN=PRKA  
2-oxoisovalerate dehydrogenase subunit beta, mitochondrial OS=Homo sapiens GN=BCK  
Arfaptin-1 OS=Homo sapiens GN=ARFIP1 PE=2 SV=1  
Nitrilase 1 OS=Homo sapiens GN=NIT1 PE=4 SV=1  
Matrix metalloproteinase-9 OS=Homo sapiens GN=MMP9 PE=1 SV=3  
CDGSH iron-sulfur domain-containing protein 2 OS=Homo sapiens GN=CISD2 PE=4 SV=1  
Pterin-4-alpha-carbinolamine dehydratase OS=Homo sapiens GN=PCBD1 PE=1 SV=2  
Glycylpeptide N-tetradecanoyltransferase 1 OS=Homo sapiens GN=NMT1 PE=1 SV=2  
Synembryn-A (Fragment) OS=Homo sapiens GN=RIC8A PE=4 SV=1

Neutrophil gelatinase-associated lipocalin OS=Homo sapiens GN=LCN2 PE=3 SV=1  
CCR4-NOT transcription complex subunit 1 OS=Homo sapiens GN=CNOT1 PE=1 SV=2  
NudC domain-containing protein 3 OS=Homo sapiens GN=NUDC3 PE=4 SV=1  
Epsin-1 OS=Homo sapiens GN=EPN1 PE=1 SV=2  
GDH/6PGL endoplasmic bifunctional protein OS=Homo sapiens GN=H6PD PE=1 SV=2  
GRB2-associated-binding protein 1 (Fragment) OS=Homo sapiens GN=GAB1 PE=4 SV=1  
Protein NOXP20 OS=Homo sapiens GN=DKFZp686F20250 PE=2 SV=1  
Uncharacterized protein (Fragment) OS=Homo sapiens PE=4 SV=1  
Kinesin light chain 4 OS=Homo sapiens GN=KLC4 PE=2 SV=1  
Proline-rich transmembrane protein 2 OS=Homo sapiens GN=PRRT2 PE=1 SV=1  
Protein C11orf31 (Fragment) OS=Homo sapiens GN=C11orf31 PE=4 SV=1  
REST corepressor 3 (Fragment) OS=Homo sapiens GN=RCOR3 PE=4 SV=1  
Argininosuccinate lyase OS=Homo sapiens GN=ASL PE=3 SV=1  
Dihydropyrimidine dehydrogenase [NADP(+)] OS=Homo sapiens GN=DPYD PE=1 SV=2  
Inositol-3-phosphate synthase 1 OS=Homo sapiens GN=ISYNA1 PE=2 SV=1  
CDC42 effector protein (Rho GTPase binding) 1 (Fragment) OS=Homo sapiens GN=CDC42  
Basic leucine zipper and W2 domain-containing protein 2 OS=Homo sapiens GN=BZW2 P  
Pituitary adenylate cyclase-activating polypeptide type I receptor (Fragment) OS=  
NADH dehydrogenase [ubiquinone] 1 subunit C2 OS=Homo sapiens GN=NDUFC2 PE=3 SV=1  
Collagen alpha-1(XI) chain OS=Homo sapiens GN=COL21A1 PE=4 SV=1  
Neural Wiskott-Aldrich syndrome protein OS=Homo sapiens GN=WASL PE=1 SV=2  
DnaJ homolog subfamily C member 8 OS=Homo sapiens GN=DNAJC8 PE=1 SV=2  
Dual specificity mitogen-activated protein kinase kinase 3 OS=Homo sapiens GN=MAP  
40S ribosomal protein S11 OS=Homo sapiens GN=RPS11 PE=1 SV=3  
Aminoacyl tRNA synthase complex-interacting multifunctional protein 2 OS=Homo sap  
Mitochondrial inner membrane organizing system protein 1 OS=Homo sapiens GN=MINOS  
WD repeat-containing protein 11 OS=Homo sapiens GN=WDR11 PE=1 SV=1  
Apoptosis-associated speck-like protein containing a CARD OS=Homo sapiens GN=PYCA  
Complement C1s subcomponent heavy chain OS=Homo sapiens GN=C1S PE=3 SV=1  
Protein farnesyltransferase/geranylgeranyltransferase type-1 subunit alpha (Fragm  
CDP-diacylglycerol--inositol 3-phosphatidyltransferase OS=Homo sapiens GN=CDIPT P  
Myotubularin-related protein 10 OS=Homo sapiens GN=MTMR10 PE=4 SV=1  
Eukaryotic translation initiation factor 6 (Fragment) OS=Homo sapiens GN=EIF6 PE=  
Ubiquitin-like protein 3 OS=Homo sapiens GN=UBL3 PE=1 SV=1  
CKLF-like MARVEL transmembrane domain-containing protein 4 (Fragment) OS=Homo sap  
Glucosamine--fructose-6-phosphate aminotransferase [isomerizing] 1 OS=Homo sapien  
ATP-dependent (S)-NAD(P)H-hydrate dehydratase OS=Homo sapiens GN=CARKD PE=2 SV=1  
Protein FADD OS=Homo sapiens GN=FADD PE=1 SV=1  
Acidic fibroblast growth factor intracellular-binding protein (Fragment) OS=Homo  
Sphingosine-1-phosphate lyase 1 OS=Homo sapiens GN=SGPL1 PE=1 SV=3  
UPF0670 protein THEM6 OS=Homo sapiens GN=THEM6 PE=1 SV=2  
IQ and ubiquitin-like domain-containing protein OS=Homo sapiens GN=IQUB PE=1 SV=2  
Casein kinase II subunit alpha' (Fragment) OS=Homo sapiens GN=CSNK2A2 PE=4 SV=1  
Pantothenate kinase 4 OS=Homo sapiens GN=PANK4 PE=4 SV=1  
Protein transport protein Sec23B OS=Homo sapiens GN=SEC23B PE=1 SV=2  
Unconventional myosin-Ic OS=Homo sapiens GN=MYO1C PE=4 SV=1  
ADP-ribosylation factor-like protein 3 OS=Homo sapiens GN=ARL3 PE=1 SV=2

Diacylglycerol kinase iota OS=Homo sapiens GN=DGKI PE=4 SV=1  
Bisphosphoglycerate mutase OS=Homo sapiens GN=BPGM PE=1 SV=2  
Protein-tyrosine sulfotransferase 1 (Fragment) OS=Homo sapiens GN=TPST1 PE=4 SV=1  
Phosphatidylinositol 3-kinase regulatory subunit beta OS=Homo sapiens GN=PIK3R2 P  
Signal transducer and activator of transcription 5A OS=Homo sapiens GN=STAT5A PE=  
HCG1811539, isoform CRA\_b OS=Homo sapiens GN=TXNDC5 PE=2 SV=1  
Extracellular matrix protein 1 OS=Homo sapiens GN=ECM1 PE=1 SV=2  
40S ribosomal protein S24 OS=Homo sapiens GN=RPS24 PE=3 SV=1  
Protein YIPF5 (Fragment) OS=Homo sapiens GN=YIPF5 PE=4 SV=1  
Lipoma-preferred partner OS=Homo sapiens GN=LPP PE=1 SV=1  
Protein RBM14-RBM4 OS=Homo sapiens GN=RBM14/RBM4 fusion PE=2 SV=1  
ATP-binding cassette sub-family E member 1 OS=Homo sapiens GN=ABCE1 PE=4 SV=1  
Zinc finger protein GLI2 OS=Homo sapiens GN=GLI2 PE=1 SV=4  
Complement factor I light chain OS=Homo sapiens GN=CFI PE=3 SV=1  
Protein phosphatase 1F OS=Homo sapiens GN=PPM1F PE=3 SV=1  
Multidrug and toxin extrusion protein 1 (Fragment) OS=Homo sapiens GN=SLC47A1 PE=

| Access Number | Grade I | Grade II | Grade III | Grade IV |
|---------------|---------|----------|-----------|----------|
| P14136        | 1       | 2        | 1         | 0.67     |
| P02768        | 1       | 0.55     | 1.73      | 0.91     |
| Q15149        | 1       | 1.9      | 1.8       | 0.9      |
| P68871        | 1       | 1        | 0.89      | 1.11     |
| P08670        | 1       | 0.58     | 1.25      | 0.83     |
| Q13509        | 1       | 0.89     | 0.67      | 1        |
| P60709        | 1       | 1.11     | 1.33      | 1.56     |
| P68363        | 1       | 0.9      | 0.8       | 0.6      |
| Q13813        | 1       | 1.09     | 0.73      | 0.64     |
| P69905        | 1       | 1        | 0.89      | 1.22     |
| Q01082        | 1       | 1.4      | 1         | 0.8      |
| P14618        | 1       | 0.7      | 0.8       | 1.2      |
| P04406        | 1       | 0.7      | 0.7       | 2.3      |
| Q00610        | 1       | 0.89     | 0.89      | 0.89     |
| P21333        | 1       | 0.5      | 0.8       | 0.9      |
| Q14204        | 1       | 1.3      | 1         | 1        |
| B1AKY9        | 1       | 1.4      | 1         | 0.8      |
| P02675        | 1       | 1        | 1         | 12.5     |
| P02671        | 1       | 0.8      | 0.9       | 9.2      |
| Q16555        | 1       | 0.8      | 0.8       | 0.7      |
| P12814        | 1       | 0.7      | 1.5       | 0.8      |
| P10809        | 1       | 1.2      | 0.8       | 1.1      |
| P25705        | 1       | 0.9      | 0.7       | 0.9      |
| P02647        | 1       | 0.8      | 2.4       | 4.9      |
| P09543        | 1       | 0.9      | 0.5       | 0.6      |
| P12277        | 1       | 0.7      | 0.5       | 0.4      |
| P06733        | 1       | 0.9      | 0.7       | 1.3      |
| P01024        | 1       | 0.82     | 1.73      | 1.64     |
| P00367        | 1       | 2.78     | 0.89      | 1.11     |
| P68104        | 1       | 0.8      | 1.2       | 1.7      |
| P02787        | 1       | 0.7      | 1.8       | 1.9      |
| P02686        | 1       | 1.9      | 0.1       | 0.5      |
| P07196        | 1       | 0.9      | 0.5       | 0.7      |
| P13611        | 1       | 7.25     | 1.25      | 1.33     |
| P07900        | 1       | 0.82     | 0.73      | 0.73     |
| A6NN80        | 1       | 1.56     | 1.22      | 1.33     |
| P02679        | 1       | 0.8      | 0.8       | 8.3      |
| P04083        | 1       | 0.45     | 0.64      | 0.91     |
| Q09666        | 1       | 1.1      | 1.4       | 1        |
| P62258        | 1       | 1.5      | 1         | 0.7      |
| P48681        | 1       | 1        | 3.55      | 1.82     |
| P11142        | 1       | 0.9      | 1         | 1.1      |
| E7ESP9        | 1       | 1.33     | 0.56      | 0.89     |
| P24821        | 1       | 3.55     | 3.09      | 1.45     |
| P46821        | 1       | 0.9      | 1         | 1.6      |
| F8VPV9        | 1       | 0.9      | 0.7       | 0.8      |



|        |   |      |      |      |
|--------|---|------|------|------|
| P01023 | 1 | 1.1  | 1.7  | 1.7  |
| A2BHY4 | 1 | 1.4  | 2.6  | 2.7  |
| P06396 | 1 | 0.9  | 0.5  | 1.4  |
| P00558 | 1 | 0.7  | 0.7  | 2.2  |
| P01857 | 1 | 0.64 | 1.55 | 1.18 |
| P08758 | 1 | 1.3  | 1.4  | 1.3  |
| P23527 | 1 | 2    | 3    | 2.6  |
| P35579 | 1 | 1    | 1.6  | 2.1  |
| A2A274 | 1 | 1.1  | 1    | 0.8  |
| P04075 | 1 | 0.73 | 0.73 | 1    |
| P40926 | 1 | 1    | 0.78 | 1    |
| Q05193 | 1 | 0.6  | 0.4  | 0.3  |
| P02511 | 1 | 3.5  | 1.1  | 1.1  |
| P09936 | 1 | 0.56 | 0.67 | 0.56 |
| P62937 | 1 | 0.7  | 0.7  | 2.1  |
| Q14315 | 1 | 0.4  | 0.5  | 0.6  |
| Q96GW7 | 1 | 2.5  | 1.2  | 1.2  |
| E7EPA7 | 1 | 0.9  | 0.7  | 1    |
| G5EA52 | 1 | 0.9  | 1.4  | 1.7  |
| P09104 | 1 | 0.9  | 0.7  | 0.6  |
| P16152 | 1 | 0.6  | 0.5  | 0.6  |
| P60201 | 1 | 2.89 | 0.67 | 1    |
| Q16352 | 1 | 0.91 | 0.45 | 0.73 |
| P07355 | 1 | 0.5  | 0.9  | 1.6  |
| P08238 | 1 | 1.33 | 1.11 | 1.11 |
| P09972 | 1 | 1.5  | 0.8  | 1    |
| P08107 | 1 | 0.83 | 0.83 | 1.17 |
| E7ENR4 | 1 | 0.6  | 0.5  | 0.7  |
| P14625 | 1 | 1    | 1.45 | 1.18 |
| P62805 | 1 | 1    | 1.9  | 2.4  |
| P01009 | 1 | 0.64 | 1.27 | 1.64 |
| P49411 | 1 | 1.2  | 0.9  | 1    |
| P62873 | 1 | 0.82 | 0.64 | 0.45 |
| Q06830 | 1 | 1    | 0.7  | 1.1  |
| Q16181 | 1 | 1.5  | 1    | 0.7  |
| B7Z242 | 1 | 0.5  | 1.2  | 0.6  |
| P09382 | 1 | 0.8  | 1.6  | 1.4  |
| P11021 | 1 | 0.9  | 1.5  | 2.6  |
| E7ER44 | 1 | 1.1  | 2    | 9    |
| P31150 | 1 | 1    | 0.8  | 0.5  |
| P07195 | 1 | 1.7  | 1.1  | 0.9  |
| POCG05 | 1 | 0.7  | 1.7  | 3.4  |
| Q92752 | 1 | 4.22 | 1.22 | 1.22 |
| P13591 | 1 | 2.6  | 1.1  | 1.1  |
| P04792 | 1 | 0.45 | 0.73 | 1.18 |
| Q01484 | 1 | 1    | 0.8  | 0.9  |
| Q9Y490 | 1 | 1    | 1.4  | 1.5  |

|        |   |      |      |      |
|--------|---|------|------|------|
| P30086 | 1 | 0.9  | 0.7  | 0.7  |
| P63104 | 1 | 0.89 | 1    | 0.78 |
| Q9Y617 | 1 | 1.8  | 1.1  | 0.6  |
| B4DGP8 | 1 | 1.7  | 2.1  | 1.4  |
| P18669 | 1 | 0.9  | 0.7  | 0.7  |
| P23471 | 1 | 3.22 | 2    | 1.11 |
| P23634 | 1 | 1.4  | 1.8  | 0.9  |
| P60174 | 1 | 1    | 0.89 | 2.33 |
| O94760 | 1 | 1    | 0.64 | 0.55 |
| P13639 | 1 | 0.9  | 1    | 1.7  |
| P46459 | 1 | 0.7  | 0.6  | 0.7  |
| Q14195 | 1 | 1.3  | 1.4  | 1    |
| E7EVA0 | 1 | 1    | 2.8  | 1.2  |
| P61764 | 1 | 0.6  | 0.4  | 0.6  |
| E9PK25 | 1 | 1    | 0.9  | 1.6  |
| P38646 | 1 | 1.4  | 0.9  | 1    |
| P48735 | 1 | 2    | 1.22 | 0.89 |
| P26038 | 1 | 0.7  | 1.2  | 1.3  |
| P55072 | 1 | 1.1  | 1.6  | 1    |
| Q13423 | 1 | 1.4  | 1    | 1.2  |
| B4DV12 | 1 | 1.11 | 1.89 | 1.22 |
| E9PHY5 | 1 | 1.4  | 1.1  | 0.7  |
| P15311 | 1 | 1.64 | 0.91 | 0.73 |
| B5MCX3 | 1 | 1.89 | 1.22 | 1.11 |
| P27348 | 1 | 1.2  | 1    | 0.7  |
| P28482 | 1 | 1.2  | 0.8  | 0.9  |
| O75083 | 1 | 0.8  | 0.8  | 1.3  |
| P01834 | 1 | 0.73 | 1.91 | 2.09 |
| P49189 | 1 | 1    | 0.7  | 0.9  |
| O15061 | 1 | 0.6  | 0.9  | 0.7  |
| Q9NQC3 | 1 | 1    | 1    | 1    |
| F5H098 | 1 | 0.9  | 0.7  | 0.6  |
| O75369 | 1 | 0.8  | 0.6  | 0.6  |
| P40939 | 1 | 1.5  | 1.1  | 1.1  |
| P07237 | 1 | 1.1  | 2    | 4.2  |
| POCOS5 | 1 | 0.8  | 1.1  | 5.5  |
| P11216 | 1 | 1.3  | 0.6  | 0.6  |
| P49419 | 1 | 1.4  | 0.7  | 0.7  |
| Q96KP4 | 1 | 0.8  | 0.6  | 0.7  |
| P11137 | 1 | 0.6  | 0.7  | 0.7  |
| P32119 | 1 | 0.9  | 0.6  | 1.2  |
| Q14764 | 1 | 0.6  | 1.1  | 1.2  |
| E9PCV6 | 1 | 0.5  | 0.4  | 2.1  |
| P02649 | 1 | 2.6  | 1.1  | 1.7  |
| P21796 | 1 | 1.1  | 0.8  | 1.1  |
| P63010 | 1 | 0.8  | 1    | 0.8  |
| B7Z1R5 | 1 | 0.7  | 0.6  | 0.7  |

|        |   |      |      |      |
|--------|---|------|------|------|
| 043175 | 1 | 1.8  | 1.1  | 1    |
| Q12860 | 1 | 2.1  | 1    | 0.9  |
| G5E9B2 | 1 | 1    | 0.8  | 1.3  |
| J3KNU8 | 1 | 3.2  | 1.2  | 1.2  |
| P00738 | 1 | 0.9  | 3.4  | 5.3  |
| P02545 | 1 | 0.7  | 0.9  | 0.8  |
| P09211 | 1 | 0.8  | 0.5  | 1    |
| P09471 | 1 | 1.3  | 0.7  | 0.7  |
| P30041 | 1 | 0.6  | 0.5  | 0.7  |
| P51178 | 1 | 0.4  | 0.3  | 0.3  |
| P55268 | 1 | 0.55 | 0.45 | 0.55 |
| E9PE77 | 1 | 1    | 1    | 8.78 |
| P06744 | 1 | 0.64 | 0.64 | 1.09 |
| P22314 | 1 | 1    | 1.1  | 0.9  |
| Q14697 | 1 | 0.7  | 0.9  | 0.8  |
| E9PLK3 | 1 | 1.2  | 0.8  | 0.9  |
| H3BRN4 | 1 | 2.9  | 1.5  | 1.1  |
| P07737 | 1 | 0.73 | 0.73 | 2.91 |
| P49327 | 1 | 1.1  | 1.3  | 1.1  |
| F8VXI5 | 1 | 3    | 0.9  | 0.6  |
| 043865 | 1 | 2.5  | 0.9  | 1.1  |
| P04899 | 1 | 1.4  | 1.6  | 1.1  |
| P30044 | 1 | 0.64 | 0.36 | 0.55 |
| P54652 | 1 | 0.64 | 0.27 | 0.45 |
| G3V5I3 | 1 | 1    | 2.8  | 3.6  |
| P00568 | 1 | 0.45 | 0.27 | 0.27 |
| P12036 | 1 | 1    | 0.6  | 1    |
| P13667 | 1 | 1.1  | 1.1  | 2.2  |
| P21281 | 1 | 0.6  | 0.5  | 0.7  |
| P27797 | 1 | 1    | 2    | 1.3  |
| Q99832 | 1 | 1    | 0.9  | 1.1  |
| Q9BPU6 | 1 | 0.82 | 0.82 | 0.73 |
| Q9Y2J2 | 1 | 1.2  | 1.3  | 1.1  |
| B4DGU4 | 1 | 1.4  | 1.3  | 1    |
| P17600 | 1 | 0.7  | 0.4  | 0.7  |
| P37802 | 1 | 0.6  | 2.2  | 1    |
| P60880 | 1 | 0.5  | 0.3  | 0.4  |
| Q01518 | 1 | 1.2  | 1.5  | 1.2  |
| Q16658 | 1 | 1.1  | 1.5  | 1.5  |
| B4E2W0 | 1 | 1.6  | 1.1  | 1.3  |
| B7ZAR1 | 1 | 1.1  | 1    | 1.1  |
| F5GWF6 | 1 | 1.1  | 1    | 1    |
| P06702 | 1 | 0.9  | 0.7  | 23.5 |
| P22626 | 1 | 1.2  | 2    | 1.2  |
| B4DQJ8 | 1 | 0.8  | 0.9  | 1.2  |
| P00747 | 1 | 0.67 | 1    | 3.56 |
| P04264 | 1 | 1.73 | 1.82 | 1.45 |

|        |   |      |      |      |
|--------|---|------|------|------|
| P12235 | 1 | 1.2  | 1    | 1    |
| Q13642 | 1 | 1.4  | 1.9  | 0.8  |
| Q99497 | 1 | 0.89 | 0.67 | 1.22 |
| Q9BW30 | 1 | 0.5  | 1.4  | 0.4  |
| F8VTL3 | 1 | 1.4  | 1.1  | 1.1  |
| P10909 | 1 | 0.82 | 1.09 | 1.64 |
| P17252 | 1 | 1.5  | 1.1  | 1    |
| P43490 | 1 | 1.1  | 1.2  | 10.1 |
| Q07954 | 1 | 1.2  | 1.5  | 1.4  |
| Q86VP6 | 1 | 1.1  | 1.2  | 0.9  |
| E9PDA4 | 1 | 1.7  | 0.8  | 0.7  |
| E9PL22 | 1 | 1.2  | 1.3  | 1.4  |
| 075947 | 1 | 0.9  | 0.6  | 0.6  |
| P00441 | 1 | 1.09 | 0.64 | 0.91 |
| P17987 | 1 | 1    | 0.9  | 1    |
| P34932 | 1 | 0.9  | 0.9  | 0.9  |
| P45880 | 1 | 1.2  | 0.8  | 1    |
| Q16891 | 1 | 1    | 0.8  | 1.1  |
| B3KUK2 | 1 | 1.4  | 2.6  | 3.1  |
| E7EMB3 | 1 | 1.69 | 1.92 | 0.62 |
| G5E949 | 1 | 2.6  | 0.9  | 1.2  |
| P00338 | 1 | 0.9  | 0.8  | 2.1  |
| P00918 | 1 | 0.6  | 0.6  | 1.3  |
| P02774 | 1 | 0.8  | 1.5  | 4.2  |
| P49588 | 1 | 1.2  | 1.1  | 1.4  |
| Q00839 | 1 | 0.9  | 1.7  | 2.2  |
| Q14974 | 1 | 1.1  | 1.2  | 1.2  |
| F5HOT1 | 1 | 1    | 1.1  | 1    |
| P00505 | 1 | 0.7  | 0.6  | 0.6  |
| P18206 | 1 | 1.2  | 1.4  | 0.8  |
| P24752 | 1 | 1.7  | 0.8  | 1.1  |
| Q9UEY8 | 1 | 1.67 | 1.56 | 0.89 |
| B4DJA5 | 1 | 1.4  | 1.5  | 1.9  |
| P04843 | 1 | 1.4  | 1.7  | 1.7  |
| P09960 | 1 | 1    | 0.9  | 1.2  |
| P19823 | 1 | 0.9  | 2.4  | 3.6  |
| P28331 | 1 | 0.9  | 0.7  | 0.8  |
| P28838 | 1 | 0.9  | 1.3  | 2.1  |
| P52272 | 1 | 1.2  | 1.4  | 1.5  |
| P55809 | 1 | 0.9  | 0.5  | 0.6  |
| Q96AQ6 | 1 | 1    | 1.5  | 0.7  |
| B4DJV2 | 1 | 1.22 | 1.11 | 1.11 |
| E9PD68 | 1 | 0.9  | 1.1  | 0.8  |
| E9PH29 | 1 | 0.9  | 0.7  | 0.7  |
| F5H2A9 | 1 | 0.9  | 0.6  | 1    |
| 095782 | 1 | 0.8  | 0.9  | 0.8  |
| P01876 | 1 | 1    | 2.2  | 3.5  |

|        |   |      |      |      |
|--------|---|------|------|------|
| P07099 | 1 | 1.3  | 0.8  | 0.7  |
| P07954 | 1 | 1.27 | 0.82 | 0.91 |
| P11047 | 1 | 0.5  | 0.5  | 0.9  |
| P13804 | 1 | 2    | 1.4  | 0.8  |
| P22695 | 1 | 1.4  | 0.9  | 1    |
| P33176 | 1 | 1.1  | 1.1  | 1.2  |
| P49368 | 1 | 0.8  | 0.8  | 1.2  |
| Q9Y2J8 | 1 | 0.9  | 0.6  | 0.7  |
| B4DZP4 | 1 | 0.9  | 0.9  | 1    |
| E5RJR5 | 1 | 1.44 | 1.22 | 0.67 |
| H7BY58 | 1 | 0.8  | 0.7  | 0.8  |
| P00387 | 1 | 1.7  | 2.7  | 0.8  |
| P00915 | 1 | 0.64 | 0.55 | 0.91 |
| P11177 | 1 | 0.91 | 0.64 | 0.73 |
| P18085 | 1 | 1.2  | 1.2  | 0.9  |
| P20700 | 1 | 2    | 2.45 | 1.36 |
| P23246 | 1 | 1.2  | 1.7  | 1.5  |
| P31146 | 1 | 1    | 1.1  | 2.2  |
| P55087 | 1 | 1.9  | 1.2  | 0.6  |
| P61981 | 1 | 1    | 1    | 1.38 |
| Q15907 | 1 | 1.67 | 1.33 | 1.89 |
| Q7KZF4 | 1 | 1.1  | 1.4  | 1.7  |
| Q9Y230 | 1 | 1    | 1    | 0.8  |
| Q9Y696 | 1 | 1.3  | 1.6  | 1.2  |
| B4DY08 | 1 | 0.9  | 1.2  | 1.3  |
| E9PGC8 | 1 | 0.6  | 0.6  | 0.7  |
| F5H3X9 | 1 | 1    | 0.9  | 1.1  |
| 000499 | 1 | 0.9  | 0.6  | 0.6  |
| P05164 | 1 | 1    | 1    | 9.2  |
| P13489 | 1 | 0.8  | 0.7  | 1    |
| P22392 | 1 | 1.18 | 0.82 | 1.82 |
| P31930 | 1 | 1    | 0.7  | 0.8  |
| P51659 | 1 | 1.5  | 1.6  | 1.5  |
| Q02218 | 1 | 0.9  | 0.6  | 1.2  |
| Q15365 | 1 | 0.6  | 0.8  | 1.7  |
| Q6UVK1 | 1 | 0.6  | 0.8  | 0.6  |
| Q9UQM7 | 1 | 0.55 | 0.36 | 0.36 |
| B0UZR7 | 1 | 1    | 0.67 | 0.89 |
| E5RHW4 | 1 | 0.9  | 1.2  | 0.7  |
| E7EU23 | 1 | 1.18 | 1.09 | 0.82 |
| F8W791 | 1 | 0.9  | 0.6  | 0.6  |
| G3V192 | 1 | 3.2  | 0.9  | 1.6  |
| J3KPX7 | 1 | 1.5  | 1    | 1.3  |
| P00488 | 1 | 0.8  | 1    | 4.9  |
| P02730 | 1 | 1.11 | 0.78 | 0.78 |
| P05026 | 1 | 0.67 | 0.67 | 0.44 |
| P10412 | 1 | 0.7  | 1.7  | 3    |

|        |   |      |      |      |
|--------|---|------|------|------|
| P16949 | 1 | 0.82 | 0.91 | 0.64 |
| P21266 | 1 | 1.33 | 0.67 | 0.67 |
| P23284 | 1 | 1.2  | 1.8  | 2.2  |
| P23526 | 1 | 1    | 1.1  | 1.2  |
| P30038 | 1 | 2.1  | 1.4  | 1.1  |
| P67775 | 1 | 1.1  | 1.1  | 1.3  |
| Q05707 | 1 | 0.5  | 0.4  | 0.5  |
| Q7L576 | 1 | 1.7  | 1.5  | 0.8  |
| Q99962 | 1 | 0.9  | 0.7  | 0.9  |
| B4DEB1 | 1 | 0.4  | 0.6  | 12.9 |
| D6RER5 | 1 | 0.8  | 1    | 1.1  |
| E9PBS1 | 1 | 1.7  | 1.6  | 1.1  |
| E9PBU3 | 1 | 1.1  | 1    | 0.8  |
| F5H2S7 | 1 | 1    | 1    | 0.8  |
| O14594 | 1 | 2    | 1.1  | 1.2  |
| O95336 | 1 | 0.9  | 0.8  | 1    |
| P12532 | 1 | 0.7  | 0.5  | 0.5  |
| P16615 | 1 | 1.36 | 1.45 | 0.91 |
| P17174 | 1 | 0.78 | 0.56 | 0.56 |
| P19827 | 1 | 0.9  | 4.1  | 2.5  |
| P23396 | 1 | 0.8  | 0.9  | 2    |
| P36871 | 1 | 1    | 0.8  | 0.8  |
| P46940 | 1 | 0.7  | 1.6  | 1.7  |
| P61604 | 1 | 1.8  | 1.3  | 1    |
| P98160 | 1 | 0.55 | 0.55 | 1.09 |
| Q08209 | 1 | 0.9  | 0.7  | 0.7  |
| Q08211 | 1 | 1.5  | 1.6  | 1.4  |
| Q8IXJ6 | 1 | 0.73 | 0.45 | 0.55 |
| A2A3N8 | 1 | 0.9  | 1.1  | 0.9  |
| A8MTH6 | 1 | 1.5  | 1    | 1.1  |
| H7BYY1 | 1 | 0.55 | 0.36 | 0.36 |
| O95865 | 1 | 0.9  | 1.7  | 1.1  |
| P02790 | 1 | 1    | 1.7  | 1.2  |
| P04233 | 1 | 1.6  | 5.9  | 1.8  |
| P07339 | 1 | 0.8  | 1    | 0.9  |
| P09417 | 1 | 1    | 0.6  | 0.8  |
| P13010 | 1 | 1.09 | 1.27 | 1    |
| Q86UP2 | 1 | 1    | 1    | 1.1  |
| B1AHC7 | 1 | 1    | 1.2  | 1.2  |
| B1AHR1 | 1 | 1.18 | 0.91 | 0.36 |
| C9JMU5 | 1 | 1.1  | 1.4  | 1.6  |
| C9JW96 | 1 | 1.4  | 1.1  | 1.3  |
| E7EMK3 | 1 | 1.5  | 1.5  | 1.7  |
| E7EPV7 | 1 | 0.4  | 0.3  | 0.4  |
| F5H7H8 | 1 | 0.4  | 0.3  | 0.3  |
| F8VVM2 | 1 | 1.67 | 1.33 | 0.89 |
| P00450 | 1 | 1    | 1.7  | 2.1  |

|        |   |      |      |      |
|--------|---|------|------|------|
| P15104 | 1 | 0.9  | 0.5  | 1.4  |
| P19338 | 1 | 1.4  | 1.7  | 1.4  |
| P31946 | 1 | 0.9  | 1    | 0.7  |
| P37837 | 1 | 0.91 | 0.73 | 1.09 |
| P40227 | 1 | 0.91 | 0.73 | 0.91 |
| P43304 | 1 | 1.5  | 1.2  | 1.2  |
| P45974 | 1 | 0.9  | 1.2  | 1.3  |
| P50502 | 1 | 1.1  | 1.5  | 0.8  |
| P50991 | 1 | 1.1  | 1    | 1    |
| P51991 | 1 | 0.8  | 1.1  | 0.9  |
| P54920 | 1 | 1    | 1.1  | 0.9  |
| Q01813 | 1 | 1.1  | 0.5  | 0.9  |
| Q13938 | 1 | 0.5  | 0.4  | 0.2  |
| Q99536 | 1 | 1.3  | 1.2  | 1.5  |
| Q9HDC9 | 1 | 1.2  | 1.2  | 2    |
| B5MDF5 | 1 | 1    | 1.1  | 1.5  |
| E9PFU1 | 1 | 0.8  | 1    | 1.4  |
| E9PH06 | 1 | 0.9  | 0.9  | 0.9  |
| E9PHI5 | 1 | 2.56 | 1.33 | 1.11 |
| 000154 | 1 | 0.5  | 0.4  | 0.7  |
| 043301 | 1 | 0.82 | 0.45 | 0.64 |
| 094769 | 1 | 0.4  | 0.3  | 0.5  |
| P04271 | 1 | 1.22 | 1    | 0.33 |
| P10636 | 1 | 0.6  | 0.5  | 0.9  |
| P10644 | 1 | 1.18 | 1.09 | 0.73 |
| P61158 | 1 | 1    | 1.27 | 1.09 |
| P61978 | 1 | 1    | 1.4  | 1.2  |
| P67936 | 1 | 1.7  | 2.2  | 1.4  |
| Q07065 | 1 | 1.4  | 1.9  | 7.1  |
| Q9UDT6 | 1 | 1.1  | 1.4  | 1    |
| A8MY36 | 1 | 1.3  | 1.1  | 1.1  |
| B1AK87 | 1 | 1.4  | 1.6  | 1.5  |
| B5MCQ5 | 1 | 1.3  | 1.8  | 1.6  |
| F5GXC8 | 1 | 0.9  | 0.6  | 0.7  |
| F5GZS6 | 1 | 1.6  | 1.1  | 0.8  |
| F5H740 | 1 | 0.8  | 0.5  | 0.6  |
| G3V2B8 | 1 | 1.3  | 1.1  | 1.9  |
| 060506 | 1 | 1.2  | 1.6  | 1    |
| 060664 | 1 | 0.9  | 1    | 2.3  |
| P00390 | 1 | 1    | 0.8  | 1.1  |
| P01859 | 1 | 0.5  | 1.6  | 3.4  |
| P01871 | 1 | 0.7  | 1.2  | 1.6  |
| P12109 | 1 | 0.6  | 0.6  | 1.2  |
| P13645 | 1 | 2.1  | 1.9  | 1.4  |
| P13746 | 1 | 1.9  | 3.2  | 2    |
| P28907 | 1 | 6.8  | 1.3  | 1.4  |
| P35998 | 1 | 1    | 1    | 1    |

|        |   |      |      |      |
|--------|---|------|------|------|
| P36543 | 1 | 0.6  | 0.5  | 0.8  |
| P78417 | 1 | 1    | 0.6  | 1.2  |
| Q07021 | 1 | 1.27 | 0.73 | 0.45 |
| Q15334 | 1 | 1.6  | 1.1  | 1    |
| Q9Y3I0 | 1 | 1.2  | 1.1  | 0.9  |
| B3KSI9 | 1 | 0.6  | 0.5  | 0.8  |
| B4DTU0 | 1 | 3.64 | 1.73 | 0.82 |
| E7EMM4 | 1 | 1.22 | 1    | 1    |
| E9PBG7 | 1 | 0.7  | 0.9  | 1.4  |
| E9PIT3 | 1 | 0.8  | 1.5  | 3.4  |
| O94811 | 1 | 0.67 | 0.44 | 0.44 |
| O94973 | 1 | 0.9  | 0.8  | 0.9  |
| P02549 | 1 | 1.1  | 0.8  | 0.9  |
| P04040 | 1 | 0.8  | 0.7  | 1.8  |
| P09455 | 1 | 0.5  | 0.8  | 0.7  |
| P09525 | 1 | 0.9  | 0.9  | 1    |
| P09874 | 1 | 1.27 | 1.73 | 1.09 |
| P11766 | 1 | 0.91 | 0.82 | 0.64 |
| P14314 | 1 | 1.18 | 1.64 | 1.09 |
| P17858 | 1 | 1.33 | 1.44 | 1.78 |
| P29966 | 1 | 8.89 | 2.78 | 2.44 |
| P30042 | 1 | 1.9  | 1.2  | 1    |
| P38117 | 1 | 1.82 | 1.36 | 1    |
| P50148 | 1 | 1.44 | 1.33 | 1    |
| P51149 | 1 | 1.1  | 1.1  | 1.7  |
| Q14CZ8 | 1 | 3.3  | 1.1  | 0.8  |
| Q15691 | 1 | 1    | 1.27 | 0.82 |
| Q5VU66 | 1 | 1.2  | 1.6  | 1.1  |
| Q92499 | 1 | 1.2  | 1.1  | 0.9  |
| Q92598 | 1 | 0.6  | 0.6  | 0.7  |
| Q9BY11 | 1 | 0.5  | 0.3  | 0.4  |
| Q9P2R3 | 1 | 1.3  | 0.9  | 1    |
| A8MV58 | 1 | 1.56 | 2.78 | 1.44 |
| B1AVU8 | 1 | 1.7  | 1.9  | 1.1  |
| B4DT69 | 1 | 1.6  | 1    | 1.1  |
| B4E1Z4 | 1 | 0.8  | 1.7  | 1.7  |
| C9JPG0 | 1 | 1.2  | 1.1  | 1.2  |
| E7EPC6 | 1 | 1.1  | 2.4  | 2.1  |
| HOYL72 | 1 | 1    | 0.7  | 0.7  |
| H3BPE1 | 1 | 1.3  | 1.3  | 1.4  |
| I3L397 | 1 | 1    | 0.89 | 0.89 |
| J3KQA0 | 1 | 0.25 | 0.25 | 0.17 |
| J9JID7 | 1 | 1.5  | 1.6  | 1.3  |
| O95817 | 1 | 1.5  | 1.6  | 1.1  |
| P04080 | 1 | 0.78 | 0.67 | 0.44 |
| P15121 | 1 | 1    | 0.7  | 1    |
| P24539 | 1 | 1.5  | 1    | 1    |



|        |   |      |      |       |
|--------|---|------|------|-------|
| P42765 | 1 | 0.9  | 1.2  | 1     |
| P60981 | 1 | 0.8  | 0.8  | 1     |
| Q00796 | 1 | 1.8  | 0.7  | 0.9   |
| Q04828 | 1 | 0.5  | 0.4  | 0.4   |
| Q04917 | 1 | 0.8  | 0.8  | 0.7   |
| Q14980 | 1 | 1.6  | 1.5  | 1.6   |
| Q15075 | 1 | 1.3  | 2.5  | 1.2   |
| Q96I99 | 1 | 2.27 | 1.45 | 1.09  |
| Q9BX66 | 1 | 1.1  | 1.2  | 1.2   |
| Q9UHD8 | 1 | 1.3  | 0.9  | 0.9   |
| A6NN60 | 1 | 1    | 0.8  | 0.9   |
| B4DE86 | 1 | 1.7  | 0.8  | 0.6   |
| B4DLZ5 | 1 | 1    | 1.1  | 1     |
| B7Z6B8 | 1 | 2.4  | 1.6  | 1.3   |
| C9J9K3 | 1 | 0.91 | 1.09 | 1.27  |
| E9PM69 | 1 | 1    | 0.9  | 1.2   |
| F8VRQ1 | 1 | 1.55 | 1.73 | 1.18  |
| F8VW21 | 1 | 1.1  | 1.4  | 1.6   |
| O15144 | 1 | 1.1  | 1.5  | 1.5   |
| P05109 | 1 | 1.09 | 1.09 | 14.18 |
| P08603 | 1 | 0.82 | 1.64 | 2.64  |
| P14866 | 1 | 1    | 1.82 | 1.09  |
| P14868 | 1 | 1.9  | 1.2  | 1.5   |
| P24043 | 1 | 0.56 | 0.44 | 0.56  |
| P28161 | 1 | 1.55 | 0.91 | 0.73  |
| P28289 | 1 | 0.82 | 1.18 | 0.64  |
| P32455 | 1 | 0.6  | 0.9  | 0.9   |
| P36776 | 1 | 1.36 | 1    | 1     |
| P43004 | 1 | 1.27 | 0.64 | 0.91  |
| P47755 | 1 | 0.9  | 1.1  | 0.7   |
| P53396 | 1 | 0.8  | 0.8  | 1.2   |
| P54577 | 1 | 1.2  | 1.1  | 1.3   |
| P55795 | 1 | 1.2  | 1.5  | 1.6   |
| P60842 | 1 | 1.2  | 1.1  | 1.4   |
| P63000 | 1 | 1.55 | 1.64 | 1.55  |
| P78324 | 1 | 0.9  | 0.6  | 0.5   |
| Q15417 | 1 | 0.9  | 1.2  | 1.1   |
| Q9H4M9 | 1 | 0.9  | 0.7  | 0.7   |
| Q9NSD9 | 1 | 1.1  | 0.9  | 0.8   |
| Q9Y2T3 | 1 | 0.7  | 0.8  | 0.5   |
| P14174 | 1 | 1.1  | 0.9  | 1.4   |
| A6NFQ9 | 1 | 0.9  | 0.9  | 0.9   |
| B1AKZ3 | 1 | 3.1  | 2    | 0.7   |
| B1ALW1 | 1 | 1.2  | 1.5  | 1.1   |
| E7EUC7 | 1 | 0.9  | 1    | 1.3   |
| E7EUY0 | 1 | 1    | 1.3  | 1.8   |
| E9PBJ5 | 1 | 1.22 | 1    | 1.44  |

|        |   |      |      |      |
|--------|---|------|------|------|
| E9PND2 | 1 | 1    | 1.2  | 1.1  |
| F5GYQ1 | 1 | 0.8  | 0.7  | 0.8  |
| F8WCA0 | 1 | 0.8  | 0.6  | 0.7  |
| G5E9M5 | 1 | 1.1  | 1    | 1.8  |
| H0YL69 | 1 | 0.9  | 1.1  | 0.8  |
| 014980 | 1 | 0.8  | 0.9  | 0.9  |
| 075131 | 1 | 1.2  | 1.4  | 1.1  |
| 075781 | 1 | 0.7  | 0.6  | 0.6  |
| P00966 | 1 | 0.7  | 1.9  | 0.8  |
| P06748 | 1 | 1    | 1.2  | 1.6  |
| P07203 | 1 | 1.2  | 1.2  | 2.3  |
| P07384 | 1 | 1.4  | 1.2  | 1.1  |
| P07814 | 1 | 0.73 | 0.91 | 1.18 |
| P10606 | 1 | 1.2  | 1.1  | 1.4  |
| P14550 | 1 | 1.1  | 0.8  | 1.3  |
| P25398 | 1 | 1.2  | 1.4  | 1.7  |
| P26232 | 1 | 1    | 0.8  | 0.7  |
| P31689 | 1 | 1    | 1.1  | 1.2  |
| P36957 | 1 | 0.9  | 0.7  | 1.2  |
| P54136 | 1 | 1    | 1.2  | 1    |
| P60953 | 1 | 1.73 | 1.73 | 1.09 |
| P61160 | 1 | 0.9  | 1    | 2.7  |
| Q02952 | 1 | 0.8  | 1.7  | 1.1  |
| Q13228 | 1 | 0.8  | 0.6  | 0.6  |
| Q14240 | 1 | 0.9  | 0.9  | 0.8  |
| Q15233 | 1 | 0.7  | 0.9  | 1.9  |
| Q16799 | 1 | 1.1  | 1.3  | 0.9  |
| Q92597 | 1 | 1    | 0.91 | 1.82 |
| Q9BUT1 | 1 | 0.7  | 0.6  | 0.8  |
| Q9UQ03 | 1 | 1.1  | 1.4  | 0.9  |
| F8W0P2 | 1 | 0.9  | 4.4  | 1.1  |
| B4DGB4 | 1 | 0.8  | 1    | 1.3  |
| B4DL14 | 1 | 1    | 0.9  | 0.8  |
| B4DTG2 | 1 | 1    | 0.9  | 1.1  |
| B4E241 | 1 | 1    | 0.8  | 1.4  |
| B7Z6Z4 | 1 | 0.6  | 1    | 4.7  |
| B7Z8M7 | 1 | 0.7  | 0.7  | 2.5  |
| C9JF17 | 1 | 1.27 | 1.55 | 1.73 |
| E7EW34 | 1 | 1    | 0.9  | 1.3  |
| E9PK01 | 1 | 1.1  | 1.1  | 1    |
| F2Z2U8 | 1 | 1.18 | 1.27 | 0.91 |
| F8VQ10 | 1 | 1.1  | 1.2  | 1    |
| F8W1A4 | 1 | 1.18 | 1.27 | 1.36 |
| G3V0I5 | 1 | 1.09 | 1    | 0.64 |
| G3V1K3 | 1 | 2.89 | 2.33 | 1.44 |
| H7BYD0 | 1 | 1.11 | 1    | 0.78 |
| J3KNX3 | 1 | 2    | 1.3  | 1.1  |

|        |   |      |      |      |
|--------|---|------|------|------|
| 043776 | 1 | 1.27 | 1.18 | 0.55 |
| 076070 | 1 | 0.8  | 0.6  | 0.8  |
| 094925 | 1 | 0.5  | 0.3  | 0.4  |
| P04004 | 1 | 0.8  | 0.8  | 4.8  |
| P11233 | 1 | 2.7  | 1.9  | 1.8  |
| P17677 | 1 | 1.7  | 2.2  | 1.5  |
| P22102 | 1 | 1.1  | 1    | 1.1  |
| P26599 | 1 | 0.64 | 1.09 | 1    |
| P35221 | 1 | 1.8  | 1.6  | 1.3  |
| P35237 | 1 | 0.9  | 0.7  | 0.6  |
| P48047 | 1 | 1.1  | 0.9  | 0.9  |
| P58546 | 1 | 0.9  | 0.8  | 1.1  |
| P60033 | 1 | 1.8  | 1.3  | 0.9  |
| P61970 | 1 | 1.27 | 1.27 | 0.64 |
| P80723 | 1 | 2.67 | 2.11 | 0.67 |
| Q15029 | 1 | 1.3  | 1.5  | 1.4  |
| Q99714 | 1 | 1.4  | 1.4  | 1.4  |
| Q9BS26 | 1 | 0.9  | 1.1  | 1.6  |
| Q9H4G0 | 1 | 0.6  | 0.7  | 0.5  |
| Q9NZ45 | 1 | 1    | 0.7  | 0.8  |
| Q9Y2A7 | 1 | 1.2  | 1.2  | 1.1  |
| Q9Y4G6 | 1 | 1.2  | 1    | 1    |
| Q13185 | 1 | 1    | 1.7  | 2.1  |
| A6NIZ1 | 1 | 1.9  | 2.1  | 1.2  |
| A6NLG9 | 1 | 0.4  | 0.4  | 0.6  |
| B0V043 | 1 | 1.2  | 1.1  | 1.9  |
| B3KR64 | 1 | 1    | 0.8  | 0.7  |
| B3KV44 | 1 | 1.18 | 1.64 | 0.73 |
| B4DT77 | 1 | 1.5  | 1.3  | 1.3  |
| B4DVE7 | 1 | 0.8  | 0.7  | 0.9  |
| B7ZKJ8 | 1 | 0.7  | 1.4  | 1.2  |
| C9J712 | 1 | 0.78 | 0.78 | 1.33 |
| D3DP09 | 1 | 0.8  | 0.6  | 0.6  |
| E7EPT4 | 1 | 0.8  | 0.8  | 1.1  |
| E7EQI5 | 1 | 0.7  | 0.8  | 0.7  |
| F5GYC0 | 1 | 0.8  | 0.5  | 0.8  |
| H0Y4R1 | 1 | 1.1  | 1.3  | 1.5  |
| J3KQ17 | 1 | 1.4  | 0.9  | 1    |
| O14818 | 1 | 1.1  | 1.1  | 1.2  |
| 043390 | 1 | 1.1  | 1.6  | 1    |
| P01008 | 1 | 0.7  | 1.4  | 1.6  |
| P05165 | 1 | 1.1  | 0.9  | 0.9  |
| P06703 | 1 | 0.75 | 3.08 | 8.42 |
| P11277 | 1 | 1.1  | 0.8  | 0.9  |
| P11498 | 1 | 2.3  | 1    | 0.6  |
| P14415 | 1 | 1.3  | 0.7  | 1.2  |
| P17655 | 1 | 1.2  | 1.5  | 0.8  |

|        |   |      |      |      |
|--------|---|------|------|------|
| P19022 | 1 | 1.3  | 1.1  | 1.1  |
| P23381 | 1 | 1    | 1.7  | 1.4  |
| P31947 | 1 | 0.33 | 0.33 | 0.33 |
| P35612 | 1 | 0.9  | 0.9  | 0.9  |
| P43034 | 1 | 1.2  | 1    | 0.9  |
| P60891 | 1 | 1.1  | 1    | 0.8  |
| P61026 | 1 | 2.6  | 1.7  | 1.5  |
| P61266 | 1 | 0.36 | 0.18 | 0.45 |
| Q02790 | 1 | 0.73 | 1.27 | 0.91 |
| Q14247 | 1 | 1.4  | 6    | 1.6  |
| Q969P0 | 1 | 0.9  | 0.6  | 0.7  |
| Q9H4A4 | 1 | 0.89 | 0.56 | 0.56 |
| Q9H9B4 | 1 | 1.4  | 0.8  | 1.2  |
| Q9P035 | 1 | 1.18 | 1.27 | 0.64 |
| Q9UBQ7 | 1 | 1.2  | 0.9  | 0.8  |
| Q9Y266 | 1 | 0.7  | 0.6  | 0.5  |
| Q9Y281 | 1 | 0.8  | 0.6  | 1    |
| Q04760 | 1 | 0.9  | 0.8  | 1.3  |
| P07108 | 1 | 6.3  | 4.3  | 0.8  |
| F5H774 | 1 | 1    | 0.8  | 1    |
| A7MAP0 | 1 | 1.1  | 1.1  | 2.7  |
| B4DF14 | 1 | 2.82 | 0.82 | 0.55 |
| B4DUS9 | 1 | 1.2  | 1    | 1    |
| B7Z9I1 | 1 | 2    | 1.8  | 1.3  |
| C9JME2 | 1 | 2.3  | 1.2  | 1    |
| C9JWM7 | 1 | 0.82 | 0.82 | 1.73 |
| C9JZR2 | 1 | 1.1  | 1.3  | 1.4  |
| E7ERU0 | 1 | 1.1  | 1.3  | 1.2  |
| F5H816 | 1 | 0.7  | 0.8  | 3    |
| F8VSD4 | 1 | 0.7  | 0.6  | 0.9  |
| G3V126 | 1 | 0.7  | 0.5  | 0.8  |
| J3KQ83 | 1 | 1.17 | 0.92 | 0.92 |
| J3QRD1 | 1 | 1.45 | 2.18 | 1.18 |
| 014745 | 1 | 3.3  | 2.1  | 1.2  |
| 015230 | 1 | 0.73 | 0.64 | 0.64 |
| 015394 | 1 | 3.3  | 1.7  | 0.8  |
| 015540 | 1 | 0.8  | 1.7  | 0.7  |
| 075874 | 1 | 0.91 | 1.09 | 2    |
| 095831 | 1 | 2.38 | 1.13 | 1.63 |
| P02749 | 1 | 0.7  | 2    | 2.9  |
| P04217 | 1 | 0.9  | 1.5  | 2.3  |
| P04844 | 1 | 1.3  | 1.9  | 0.7  |
| P11413 | 1 | 0.73 | 0.82 | 1.09 |
| P13073 | 1 | 1.27 | 1    | 1.18 |
| P20674 | 1 | 0.55 | 0.45 | 1.45 |
| P25786 | 1 | 1.2  | 1.1  | 1.5  |
| P30043 | 1 | 0.78 | 0.56 | 1.11 |

|        |   |      |      |      |
|--------|---|------|------|------|
| P30049 | 1 | 1.13 | 0.63 | 1    |
| P47985 | 1 | 1.6  | 1.1  | 1.1  |
| P49591 | 1 | 1    | 1.1  | 1.3  |
| P50440 | 1 | 0.7  | 0.8  | 0.6  |
| P61163 | 1 | 1    | 1    | 1.11 |
| Q12905 | 1 | 1    | 1.3  | 0.7  |
| Q13011 | 1 | 1.4  | 0.9  | 1.2  |
| Q16531 | 1 | 0.8  | 0.7  | 1.1  |
| Q8N3J6 | 1 | 1.9  | 1.1  | 0.6  |
| Q99747 | 1 | 1    | 0.78 | 1    |
| Q9UIJ7 | 1 | 2.3  | 1.2  | 0.7  |
| Q9Y265 | 1 | 0.8  | 1    | 0.9  |
| Q9Y3Z3 | 1 | 0.8  | 1.3  | 1.4  |
| P10768 | 1 | 0.9  | 0.5  | 0.8  |
| C9JV77 | 1 | 0.64 | 1.82 | 1.18 |
| Q13424 | 1 | 1.64 | 1.27 | 0.36 |
| A8K3Z3 | 1 | 1    | 0.9  | 0.9  |
| B4DJ62 | 1 | 0.4  | 0.4  | 0.3  |
| B4DTC3 | 1 | 1.44 | 1.67 | 1.22 |
| B4DZI8 | 1 | 1.1  | 1.2  | 1    |
| C9JFR7 | 1 | 0.8  | 1    | 0.9  |
| E7EQV3 | 1 | 0.9  | 1.2  | 2.3  |
| E9PCE8 | 1 | 1.4  | 1.5  | 1.2  |
| F5H7V7 | 1 | 1.67 | 1.44 | 1    |
| F8VQX6 | 1 | 1.7  | 0.9  | 1.6  |
| F8VY02 | 1 | 0.7  | 1.2  | 1.5  |
| F8W998 | 1 | 2.5  | 1.2  | 1.2  |
| H0YCY6 | 1 | 0.7  | 0.6  | 0.9  |
| J3KPM7 | 1 | 1.2  | 1    | 0.8  |
| J3KQ32 | 1 | 0.7  | 0.6  | 0.9  |
| J3QRU1 | 1 | 2.1  | 1.4  | 1.2  |
| 075323 | 1 | 1.8  | 0.8  | 1    |
| 075380 | 1 | 0.6  | 0.5  | 0.9  |
| 075955 | 1 | 2    | 1.3  | 1.7  |
| P01019 | 1 | 1.6  | 1.1  | 1    |
| P04003 | 1 | 0.7  | 0.6  | 3.1  |
| P05387 | 1 | 1.4  | 2.2  | 2.5  |
| P06727 | 1 | 0.8  | 1.2  | 1.6  |
| P09496 | 1 | 1    | 0.8  | 1.6  |
| P14543 | 1 | 0.7  | 0.6  | 1.2  |
| P20618 | 1 | 1    | 0.9  | 1.8  |
| P42224 | 1 | 1    | 1.3  | 1.4  |
| P51884 | 1 | 0.4  | 0.3  | 0.5  |
| P53618 | 1 | 1    | 1.1  | 1    |
| P55060 | 1 | 0.82 | 0.91 | 0.55 |
| P69891 | 1 | 0.7  | 0.4  | 0.4  |
| Q06323 | 1 | 1.1  | 0.9  | 0.9  |

|               |          |            |            |            |
|---------------|----------|------------|------------|------------|
| Q13177        | 1        | 1.11       | 1.11       | 1.44       |
| Q13409        | 1        | 1.2        | 0.9        | 1.1        |
| Q14019        | 1        | 1          | 0.8        | 1          |
| Q14344        | 1        | 3          | 1.6        | 1.1        |
| Q15435        | 1        | 0.9        | 0.8        | 1.2        |
| Q5JWF2        | 1        | 1.67       | 1.56       | 1.33       |
| Q6YN16        | 1        | 2.22       | 1.22       | 1.11       |
| Q8IVF2        | 1        | 0.5        | 0.6        | 0.5        |
| Q8TAM6        | 1        | 0.8        | 0.5        | 0.6        |
| Q92973        | 1        | 1.3        | 1.4        | 0.8        |
| Q96QK1        | 1        | 1          | 0.9        | 1          |
| Q9H115        | 1        | 0.6        | 0.4        | 0.5        |
| Q9HC38        | 1        | 1.1        | 0.6        | 0.8        |
| Q9Y6R1        | 1        | 5.6        | 1.4        | 1.4        |
| Q14914        | 1        | 0.88       | 0.75       | 0.63       |
| I3L3P7        | 1        | 1.1        | 1.3        | 1.9        |
| A8MXP9        | 1        | 1.3        | 1.3        | 1          |
| <b>B1AHM9</b> | <b>1</b> | <b>1.4</b> | <b>0.7</b> | <b>2.1</b> |
| B4DLR8        | 1        | 0.5        | 0.5        | 0.5        |
| E5KLJ5        | 1        | 1          | 1          | 0.6        |
| E5RHG8        | 1        | 1          | 1          | 1.1        |
| E7EMS6        | 1        | 1          | 1.27       | 0.64       |
| E9PDN5        | 1        | 1.2        | 0.9        | 0.5        |
| E9PHR3        | 1        | 0.5        | 0.5        | 1.1        |
| F5GXN1        | 1        | 0.9        | 1          | 0.6        |
| F5H569        | 1        | 0.6        | 0.6        | 0.9        |
| F5H897        | 1        | 1.7        | 1.1        | 1.3        |
| F6SBX2        | 1        | 1          | 0.8        | 0.8        |
| G3V295        | 1        | 1          | 1          | 1.8        |
| G3XAI2        | 1        | 0.7        | 0.6        | 1.1        |
| G8JLA8        | 1        | 1          | 0.78       | 3.89       |
| HOYBL1        | 1        | 1.8        | 1.3        | 1.1        |
| J3KR54        | 1        | 1.1        | 1.4        | 1.1        |
| 000571        | 1        | 1          | 1.3        | 1.7        |
| 014531        | 1        | 0.9        | 0.8        | 0.8        |
| 014979        | 1        | 1.56       | 2.78       | 0.89       |
| 043157        | 1        | 3.5        | 1.6        | 1          |
| 043488        | 1        | 1.1        | 0.5        | 0.3        |
| 075367        | 1        | 1          | 1.2        | 1.8        |
| 075891        | 1        | 2.27       | 1.73       | 1.45       |
| P02652        | 1        | 0.7        | 2.8        | 2.3        |
| P05556        | 1        | 1.3        | 1.7        | 2.7        |
| P08247        | 1        | 0.5        | 0.4        | 0.4        |
| P08559        | 1        | 1.3        | 0.9        | 0.7        |
| P12110        | 1        | 0.78       | 0.67       | 1.11       |
| P21283        | 1        | 1          | 0.8        | 0.9        |
| P21399        | 1        | 0.8        | 0.7        | 1          |

|        |   |      |      |      |
|--------|---|------|------|------|
| P23368 | 1 | 1.7  | 1.3  | 1    |
| P25391 | 1 | 0.7  | 0.6  | 0.6  |
| P35573 | 1 | 1.2  | 1    | 0.8  |
| P36578 | 1 | 0.91 | 2    | 1.09 |
| P38919 | 1 | 1.36 | 1.64 | 1    |
| P42704 | 1 | 1.22 | 1.11 | 1    |
| P46777 | 1 | 0.9  | 1.5  | 2.1  |
| P50454 | 1 | 0.82 | 1.45 | 2.27 |
| P51553 | 1 | 0.8  | 0.7  | 1.2  |
| P51572 | 1 | 1.2  | 1.5  | 1.2  |
| P52758 | 1 | 3.3  | 1.6  | 0.8  |
| P53597 | 1 | 1.3  | 0.8  | 0.9  |
| P54289 | 1 | 0.9  | 1.5  | 1.3  |
| P61106 | 1 | 1.1  | 1.2  | 1.2  |
| P62140 | 1 | 1.1  | 1.2  | 1.8  |
| Q04837 | 1 | 3.4  | 2.4  | 1.4  |
| Q14008 | 1 | 1    | 1    | 1.1  |
| Q15181 | 1 | 1.2  | 1.2  | 1.1  |
| Q9BPW8 | 1 | 1.4  | 1.1  | 0.9  |
| Q9GZV7 | 1 | 1.1  | 0.3  | 0.6  |
| Q9NTX5 | 1 | 1.09 | 1.09 | 1.27 |
| Q9NZ08 | 1 | 0.91 | 1.18 | 1.09 |
| Q9UPY8 | 1 | 0.6  | 0.5  | 0.5  |
| E7EV01 | 1 | 1.2  | 2.1  | 1    |
| H3BPB8 | 1 | 1    | 0.7  | 1    |
| P00403 | 1 | 0.6  | 0.6  | 0.8  |
| P13796 | 1 | 1    | 1.3  | 3.9  |
| P23515 | 1 | 0.75 | 0.33 | 0.58 |
| Q00765 | 1 | 0.6  | 1.2  | 1.7  |
| G3V1D4 | 1 | 2.9  | 1.4  | 1.4  |
| P09429 | 1 | 1.4  | 1.2  | 1.9  |
| P13693 | 1 | 0.8  | 0.6  | 1.3  |
| Q9H2M9 | 1 | 0.6  | 0.6  | 0.9  |
| P60866 | 1 | 0.7  | 1    | 2.4  |
| Q6P2I3 | 1 | 1.2  | 0.8  | 0.8  |
| Q14108 | 1 | 1.7  | 1.7  | 1.3  |
| P53985 | 1 | 1.09 | 1    | 2.36 |
| B8ZZ77 | 1 | 0.6  | 0.5  | 0.8  |
| A0AVT1 | 1 | 0.9  | 1.2  | 1.4  |
| B4DDP6 | 1 | 1.1  | 1.3  | 1.6  |
| B4DU58 | 1 | 0.45 | 0.64 | 1.45 |
| B4DUC8 | 1 | 1.36 | 1.09 | 0.82 |
| B4E2V5 | 1 | 1.6  | 0.6  | 4.4  |
| B7Z233 | 1 | 1.1  | 1.1  | 0.9  |
| C9JMC5 | 1 | 0.44 | 0.33 | 0.33 |
| D6RAC2 | 1 | 0.9  | 1.1  | 2.4  |
| E9PEJ4 | 1 | 1.2  | 0.8  | 0.8  |

|        |   |      |      |      |
|--------|---|------|------|------|
| F5GYR8 | 1 | 0.9  | 1.1  | 1.6  |
| F5H668 | 1 | 1.2  | 1    | 1.2  |
| F8VTY8 | 1 | 1.2  | 1.2  | 1.6  |
| F8W6H6 | 1 | 1    | 0.9  | 0.8  |
| G5E9Y2 | 1 | 1.11 | 1.11 | 1    |
| H0Y8C6 | 1 | 1.4  | 1.4  | 1.2  |
| I6L8B7 | 1 | 0.45 | 0.91 | 1.09 |
| 043242 | 1 | 1.33 | 1.17 | 1.42 |
| 060884 | 1 | 1.1  | 1.1  | 0.9  |
| 075489 | 1 | 1.4  | 1.1  | 0.6  |
| 076041 | 1 | 0.82 | 0.73 | 0.45 |
| P00491 | 1 | 1.4  | 0.8  | 1.1  |
| P01034 | 1 | 1.2  | 1.1  | 1    |
| P02763 | 1 | 1.36 | 6.64 | 1.73 |
| P08574 | 1 | 0.9  | 0.8  | 1.3  |
| P13861 | 1 | 1.1  | 1.1  | 1.4  |
| P17302 | 1 | 2.8  | 0.7  | 1    |
| P21589 | 1 | 1.5  | 1    | 2.8  |
| P30084 | 1 | 1.2  | 0.9  | 0.9  |
| P35527 | 1 | 1.56 | 1.56 | 1.56 |
| P36222 | 1 | 1.3  | 2.7  | 14.2 |
| P49753 | 1 | 1.18 | 0.82 | 0.82 |
| P52597 | 1 | 0.73 | 0.82 | 0.82 |
| P61081 | 1 | 0.8  | 1    | 0.8  |
| P61586 | 1 | 1    | 0.6  | 2.8  |
| Q02750 | 1 | 1    | 0.89 | 1    |
| Q07960 | 1 | 0.7  | 1    | 1.3  |
| Q08722 | 1 | 1.7  | 1.6  | 1    |
| Q12805 | 1 | 0.8  | 0.6  | 1.7  |
| Q13263 | 1 | 1.1  | 2.2  | 1.4  |
| Q13554 | 1 | 0.64 | 0.36 | 0.45 |
| Q14152 | 1 | 1.1  | 1    | 1.3  |
| Q5W0J0 | 1 | 1.64 | 1.27 | 1.45 |
| Q8IWA5 | 1 | 2.8  | 1.7  | 1    |
| Q96I24 | 1 | 0.91 | 1.45 | 1.64 |
| Q9BSJ8 | 1 | 0.6  | 0.7  | 0.9  |
| Q9HAV0 | 1 | 1.3  | 1.7  | 0.7  |
| Q9NRV9 | 1 | 1.3  | 0.9  | 0.9  |
| Q9P2E9 | 1 | 0.9  | 1.2  | 2.4  |
| Q9UDR5 | 1 | 2.91 | 1.55 | 0.91 |
| Q9UHD9 | 1 | 1.1  | 1.3  | 1.1  |
| Q9UMS4 | 1 | 1    | 1.3  | 1.1  |
| Q9Y6R7 | 1 | 1.2  | 5.8  | 2    |
| P09497 | 1 | 0.55 | 0.55 | 0.64 |
| B5ME97 | 1 | 1.82 | 1.73 | 0.73 |
| J3KND9 | 1 | 1.6  | 1    | 1.4  |
| A0MZ66 | 1 | 1.3  | 0.8  | 0.8  |



|        |   |      |      |      |
|--------|---|------|------|------|
| P02748 | 1 | 1.11 | 1    | 5.78 |
| P07858 | 1 | 1    | 1.64 | 2.27 |
| H3BQZ7 | 1 | 1.08 | 1.08 | 0.5  |
| 000231 | 1 | 0.91 | 0.82 | 1    |
| B4DP11 | 1 | 0.9  | 0.9  | 0.8  |
| A6NNI4 | 1 | 3.2  | 2.4  | 0.7  |
| P60903 | 1 | 0.3  | 0.9  | 0.3  |
| A8MVQ3 | 1 | 1.11 | 1.44 | 1.11 |
| B1AJQ6 | 1 | 1.1  | 1.6  | 1.2  |
| B1APG4 | 1 | 0.9  | 0.8  | 0.9  |
| B4DHP6 | 1 | 1.6  | 2.5  | 1.7  |
| B4DRZ7 | 1 | 1.3  | 1.3  | 1    |
| B4DUR9 | 1 | 0.7  | 0.7  | 0.7  |
| B5ME19 | 1 | 1    | 1.1  | 1.5  |
| B7Z3I9 | 1 | 1.3  | 1.1  | 1.2  |
| B7Z6C0 | 1 | 0.9  | 0.9  | 0.7  |
| C9JDE9 | 1 | 2    | 1.78 | 1.89 |
| C9JRZ6 | 1 | 1.82 | 1.36 | 1.27 |
| D3DNT2 | 1 | 0.9  | 1    | 0.9  |
| D3DQV9 | 1 | 0.8  | 0.8  | 0.9  |
| E3W994 | 1 | 1.1  | 1    | 0.7  |
| E7EVH7 | 1 | 0.9  | 0.9  | 1.2  |
| E7EWZ6 | 1 | 1.7  | 1.5  | 1.2  |
| E9PKG1 | 1 | 1    | 1.5  | 1    |
| F5GXH5 | 1 | 0.9  | 1    | 0.9  |
| F5GY03 | 1 | 1.9  | 1.4  | 2.3  |
| F8VW96 | 1 | 1.09 | 1    | 1.64 |
| G8JLP2 | 1 | 1.5  | 0.9  | 1.2  |
| H0Y2M5 | 1 | 1    | 1.1  | 1.6  |
| H9KVC2 | 1 | 0.7  | 0.4  | 0.7  |
| J3KQG6 | 1 | 1.1  | 1.1  | 1.2  |
| 000151 | 1 | 0.56 | 0.89 | 0.44 |
| 043813 | 1 | 1.3  | 0.8  | 0.9  |
| 060493 | 1 | 0.8  | 0.7  | 1.5  |
| 075396 | 1 | 1.2  | 1.2  | 1.6  |
| 094826 | 1 | 1    | 0.8  | 1.1  |
| 095202 | 1 | 1.2  | 1.1  | 0.8  |
| P08697 | 1 | 0.9  | 1.2  | 4    |
| P10915 | 1 | 4    | 1    | 1.3  |
| P15880 | 1 | 0.82 | 1.36 | 1.36 |
| P16401 | 1 | 1.2  | 4.2  | 5.3  |
| P20336 | 1 | 0.6  | 0.7  | 0.8  |
| P21912 | 1 | 1    | 1    | 1.3  |
| P25788 | 1 | 0.7  | 0.8  | 1.6  |
| P26639 | 1 | 0.91 | 1    | 0.82 |
| P28066 | 1 | 1    | 1.1  | 1.3  |
| P30050 | 1 | 0.9  | 1.3  | 3.6  |

|               |          |            |            |            |
|---------------|----------|------------|------------|------------|
| P30740        | 1        | 0.64       | 0.55       | 2.55       |
| P40123        | 1        | 0.7        | 0.7        | 0.9        |
| P50416        | 1        | 1.7        | 4.4        | 1.6        |
| P53004        | 1        | 1          | 1.7        | 1.6        |
| P62191        | 1        | 0.91       | 1.27       | 1.18       |
| <b>P62993</b> | <b>1</b> | <b>1.1</b> | <b>1.1</b> | <b>2.3</b> |
| P78357        | 1        | 1.2        | 1.2        | 1          |
| Q00577        | 1        | 1.1        | 0.8        | 0.7        |
| Q01995        | 1        | 0.5        | 0.4        | 0.9        |
| Q08752        | 1        | 0.7        | 0.6        | 1          |
| Q13151        | 1        | 1          | 1.2        | 2.4        |
| Q13464        | 1        | 1.2        | 1.2        | 1.1        |
| Q13555        | 1        | 0.9        | 0.6        | 0.5        |
| Q13884        | 1        | 1.4        | 0.9        | 1.8        |
| Q15102        | 1        | 1.1        | 0.9        | 0.8        |
| Q16143        | 1        | 0.6        | 0.5        | 0.7        |
| Q5SSJ5        | 1        | 0.9        | 1          | 1.5        |
| Q6IBS0        | 1        | 0.64       | 1.09       | 1.09       |
| Q8N111        | 1        | 1.56       | 1.78       | 1.22       |
| Q8NBX0        | 1        | 1          | 0.7        | 0.9        |
| Q8NCW5        | 1        | 1          | 0.8        | 0.7        |
| Q8NFZ8        | 1        | 1.5        | 1.3        | 0.9        |
| Q96CX2        | 1        | 1.67       | 1.75       | 0.92       |
| Q96F85        | 1        | 0.82       | 0.55       | 0.55       |
| Q96FC7        | 1        | 1.5        | 0.9        | 1.1        |
| Q96G03        | 1        | 1.4        | 1.3        | 1.2        |
| Q99426        | 1        | 1          | 1.09       | 1          |
| Q99436        | 1        | 0.6        | 0.7        | 2.2        |
| Q9BRX8        | 1        | 1.9        | 1.4        | 0.8        |
| Q9BTV4        | 1        | 0.9        | 1.7        | 0.9        |
| Q9H936        | 1        | 0.7        | 0.5        | 0.8        |
| Q9HCC0        | 1        | 1.6        | 1          | 1.5        |
| Q9NVI7        | 1        | 1.89       | 1.33       | 1.44       |
| Q9NZU5        | 1        | 0.6        | 0.5        | 2.1        |
| Q9POL0        | 1        | 1.5        | 0.9        | 1          |
| Q9UHQ9        | 1        | 1          | 0.7        | 1          |
| Q9Y2S2        | 1        | 1.3        | 0.6        | 1.3        |
| B7Z2R2        | 1        | 0.8        | 0.5        | 1          |
| E9PFH8        | 1        | 1          | 0.82       | 0.82       |
| E9PPW7        | 1        | 1.6        | 1.1        | 0.9        |
| P02766        | 1        | 1.2        | 1.9        | 2.7        |
| B0FLL2        | 1        | 1.1        | 0.6        | 1.1        |
| 095881        | 1        | 1.2        | 1.7        | 2.8        |
| P46976        | 1        | 2.1        | 1.9        | 1.9        |
| P50135        | 1        | 1.3        | 0.8        | 1.1        |
| H0YJ34        | 1        | 1.1        | 1.2        | 1.9        |
| P49773        | 1        | 0.3        | 0.4        | 1.9        |

|        |   |      |      |      |
|--------|---|------|------|------|
| 014773 | 1 | 1.3  | 1    | 1.4  |
| P05161 | 1 | 0.6  | 1.2  | 0.4  |
| A8MUS3 | 1 | 0.82 | 1.64 | 1.55 |
| D6R9P3 | 1 | 1.4  | 1.9  | 1    |
| 075340 | 1 | 1.3  | 1.1  | 0.9  |
| 000487 | 1 | 0.7  | 0.6  | 0.8  |
| P63167 | 1 | 0.3  | 0.3  | 2    |
| P04632 | 1 | 0.9  | 0.8  | 1.4  |
| 060262 | 1 | 1.7  | 1    | 0.4  |
| Q5T123 | 1 | 0.7  | 0.8  | 2    |
| E7EMM2 | 1 | 0.8  | 0.9  | 1.2  |
| A8MXH2 | 1 | 1.2  | 0.8  | 0.7  |
| BOYIW6 | 1 | 0.9  | 1    | 1.4  |
| B3KWE1 | 1 | 1.3  | 1.3  | 1.4  |
| B4DEK4 | 1 | 1    | 1    | 1.7  |
| B4DP62 | 1 | 3.1  | 2.5  | 1.4  |
| B4DVB8 | 1 | 0.8  | 1.5  | 1.3  |
| B4E1F0 | 1 | 0.91 | 1.64 | 1.09 |
| B4E1K7 | 1 | 1.3  | 1.2  | 1.2  |
| B7Z815 | 1 | 0.9  | 0.9  | 1.1  |
| C9JQS9 | 1 | 1.3  | 1.1  | 0.8  |
| E7EPC8 | 1 | 1.5  | 0.9  | 1.4  |
| E7ES43 | 1 | 0.6  | 0.8  | 0.9  |
| E9PC15 | 1 | 1.4  | 1    | 1.4  |
| E9PFW3 | 1 | 0.8  | 1    | 1.7  |
| F2Z3F8 | 1 | 0.9  | 0.8  | 0.6  |
| G5E9L9 | 1 | 1.4  | 1.5  | 0.7  |
| I3L430 | 1 | 1.1  | 0.8  | 1.2  |
| J3KPM8 | 1 | 0.73 | 0.55 | 0.55 |
| J3KTL2 | 1 | 1.8  | 2.4  | 1.8  |
| 000299 | 1 | 0.3  | 0.3  | 2.3  |
| 015031 | 1 | 1.2  | 1.3  | 0.9  |
| 015400 | 1 | 1.1  | 1.6  | 1.1  |
| 015511 | 1 | 1.2  | 1.7  | 2.3  |
| 043837 | 1 | 1.1  | 0.7  | 1    |
| 060437 | 1 | 0.4  | 0.3  | 0.4  |
| 075521 | 1 | 2.1  | 1.4  | 1.7  |
| 075643 | 1 | 1.1  | 0.9  | 1.7  |
| 075964 | 1 | 0.9  | 0.7  | 1.3  |
| 076054 | 1 | 1.3  | 1.1  | 2    |
| 094919 | 1 | 0.91 | 0.82 | 1.73 |
| P02462 | 1 | 0.64 | 0.55 | 2.45 |
| P18124 | 1 | 0.6  | 1.6  | 1.3  |
| P35908 | 1 | 2    | 1.8  | 1.6  |
| P36955 | 1 | 0.5  | 0.9  | 1.4  |
| P48506 | 1 | 1.6  | 1    | 0.7  |
| P53999 | 1 | 1.8  | 1.1  | 1    |

|        |   |      |      |      |
|--------|---|------|------|------|
| P58107 | 1 | 0.4  | 0.3  | 0.3  |
| Q13136 | 1 | 1    | 2.1  | 1.2  |
| Q14112 | 1 | 0.4  | 0.4  | 0.9  |
| Q14118 | 1 | 1.3  | 1.6  | 0.6  |
| Q14847 | 1 | 1    | 0.9  | 1.6  |
| Q15046 | 1 | 1    | 1.1  | 1.2  |
| Q16204 | 1 | 0.8  | 0.8  | 1    |
| Q4V328 | 1 | 0.9  | 1.1  | 0.9  |
| Q6PCE3 | 1 | 0.8  | 0.6  | 1.1  |
| Q8N163 | 1 | 0.9  | 1.1  | 2.5  |
| Q92747 | 1 | 1.33 | 1.67 | 1.11 |
| Q99460 | 1 | 1.1  | 1.3  | 2.4  |
| Q9BZV1 | 1 | 0.8  | 0.7  | 0.6  |
| Q9UHG3 | 1 | 1.3  | 1    | 1.3  |
| Q9UHY7 | 1 | 0.8  | 0.6  | 0.7  |
| Q9UI15 | 1 | 0.89 | 0.67 | 0.33 |
| Q9UK22 | 1 | 1.27 | 1.09 | 0.91 |
| Q9Y2Q0 | 1 | 0.6  | 0.4  | 0.4  |
| Q9Y3C6 | 1 | 1    | 1.1  | 1.3  |
| Q9Y5X3 | 1 | 1    | 1.2  | 1.2  |
| Q9Y6N6 | 1 | 0.4  | 0.3  | 0.4  |
| F5H533 | 1 | 0.82 | 0.55 | 0.64 |
| H0YFH3 | 1 | 0.8  | 0.7  | 1.2  |
| 095292 | 1 | 0.9  | 1.2  | 1.1  |
| P39060 | 1 | 0.4  | 0.4  | 0.7  |
| B4DIR0 | 1 | 1.2  | 1    | 1    |
| G3V2N0 | 1 | 1    | 1.1  | 0.9  |
| 000264 | 1 | 1    | 1    | 0.9  |
| Q9NR45 | 1 | 0.7  | 0.5  | 2.6  |
| P62753 | 1 | 0.9  | 1.1  | 1.7  |
| Q08170 | 1 | 1.4  | 1.6  | 2    |
| P31942 | 1 | 1.5  | 1.7  | 2.2  |
| E9PGT1 | 1 | 1.9  | 1.3  | 2.2  |
| 043852 | 1 | 1.6  | 4.5  | 1.6  |
| Q08380 | 1 | 1.2  | 1.9  | 1.3  |
| P31153 | 1 | 0.9  | 0.7  | 1.6  |
| P41250 | 1 | 0.8  | 0.7  | 0.9  |
| J3QT22 | 1 | 1.3  | 0.8  | 1.1  |
| P43007 | 1 | 5.8  | 1.6  | 1.5  |
| P22059 | 1 | 1.1  | 0.9  | 1.2  |
| P62745 | 1 | 0.6  | 0.4  | 0.8  |
| Q01581 | 1 | 0.89 | 1.56 | 1    |
| P10620 | 1 | 1.4  | 1.3  | 0.9  |
| F5H1S8 | 1 | 0.91 | 1    | 1.18 |
| P62942 | 1 | 0.9  | 1.1  | 1.6  |
| H0YGX7 | 1 | 0.7  | 0.9  | 2.4  |
| E7EP00 | 1 | 0.9  | 0.8  | 2.2  |

|        |   |      |      |      |
|--------|---|------|------|------|
| P19086 | 1 | 1.2  | 1.1  | 0.7  |
| 060613 | 1 | 0.9  | 1.5  | 1.8  |
| 075368 | 1 | 1.6  | 1.9  | 0.3  |
| Q96JE9 | 1 | 0.56 | 0.44 | 0.33 |
| Q9BX68 | 1 | 1    | 0.8  | 0.7  |
| Q53GQ0 | 1 | 1.5  | 1.1  | 1.8  |
| P68036 | 1 | 0.7  | 0.9  | 1    |
| P11215 | 1 | 1.4  | 1.4  | 5.1  |
| P57105 | 1 | 1.3  | 1.1  | 1.1  |
| Q9BVK6 | 1 | 1.5  | 2.2  | 1.4  |
| HOYMV8 | 1 | 1.18 | 1.27 | 1.73 |
| Q00535 | 1 | 0.8  | 0.7  | 0.9  |
| Q00341 | 1 | 0.6  | 1    | 2.9  |
| F5H6I0 | 1 | 2.9  | 3.7  | 1.4  |
| F5H5M9 | 1 | 1.6  | 1.4  | 1.3  |
| Q92688 | 1 | 1    | 1.5  | 1.4  |
| Q2TAM5 | 1 | 1.7  | 1.1  | 2.2  |
| B7Z8E4 | 1 | 0.8  | 0.9  | 0.6  |
| C9JEV0 | 1 | 0.8  | 2.4  | 1    |
| B4DFL4 | 1 | 1    | 0.45 | 0.55 |
| B4DP47 | 1 | 2    | 1.1  | 1    |
| B4E2X2 | 1 | 0.8  | 0.9  | 0.5  |
| B7Z514 | 1 | 0.6  | 0.7  | 1.3  |
| C9JD32 | 1 | 0.9  | 1.3  | 1.8  |
| C9JFZ1 | 1 | 0.7  | 0.6  | 0.6  |
| C9JGI3 | 1 | 0.7  | 1.3  | 3.8  |
| D6RA82 | 1 | 0.6  | 0.8  | 5.1  |
| E5RIW3 | 1 | 1.3  | 1.1  | 1.4  |
| E7EV80 | 1 | 1.1  | 1.4  | 0.8  |
| E9PC80 | 1 | 1.2  | 1.1  | 1    |
| E9PJC7 | 1 | 2.3  | 0.9  | 1.2  |
| F5H301 | 1 | 2.18 | 1    | 0.64 |
| F5H5G1 | 1 | 1.9  | 1.8  | 0.7  |
| F5H8B3 | 1 | 0.8  | 0.5  | 0.9  |
| G8JLD5 | 1 | 0.78 | 0.89 | 1.56 |
| HOY5W0 | 1 | 1.2  | 1.2  | 1.3  |
| J3QK90 | 1 | 0.9  | 1.3  | 1.6  |
| 000161 | 1 | 1.36 | 1.45 | 1.45 |
| 043592 | 1 | 1    | 1    | 0.9  |
| 043681 | 1 | 1.1  | 1.2  | 1.1  |
| 075475 | 1 | 1.6  | 2    | 1.1  |
| 075506 | 1 | 1    | 1.1  | 0.8  |
| 075569 | 1 | 0.8  | 0.8  | 1.1  |
| 094819 | 1 | 1.8  | 0.8  | 1    |
| P02747 | 1 | 1.2  | 1.7  | 1.9  |
| P23786 | 1 | 1.9  | 1.4  | 0.7  |
| P27144 | 1 | 1.1  | 0.8  | 1.5  |

|        |   |      |      |      |
|--------|---|------|------|------|
| P31937 | 1 | 2.1  | 1.2  | 1.4  |
| P34897 | 1 | 1.7  | 1.5  | 1.7  |
| P46060 | 1 | 0.9  | 0.7  | 1.5  |
| P47897 | 1 | 1.1  | 1    | 1.2  |
| P55010 | 1 | 0.7  | 0.6  | 2.5  |
| P62241 | 1 | 0.9  | 1.5  | 1.4  |
| P62899 | 1 | 1    | 1.3  | 1.7  |
| P67809 | 1 | 1.56 | 3.33 | 2.11 |
| Q12792 | 1 | 0.9  | 1.2  | 0.8  |
| Q12904 | 1 | 0.8  | 1    | 1.8  |
| Q13526 | 1 | 0.6  | 0.6  | 0.8  |
| Q16762 | 1 | 2.5  | 1.2  | 1.2  |
| Q4G0N4 | 1 | 1.5  | 0.9  | 1.2  |
| Q6UWR7 | 1 | 2.2  | 1    | 1.8  |
| Q8N1G4 | 1 | 1.7  | 1.3  | 1.4  |
| Q8TCU6 | 1 | 1.3  | 1.9  | 1.1  |
| Q8TDQ7 | 1 | 1.3  | 0.8  | 1    |
| Q8WWI5 | 1 | 1.9  | 1    | 0.8  |
| Q96CV9 | 1 | 0.55 | 1    | 0.82 |
| Q96HC4 | 1 | 1.1  | 0.9  | 0.8  |
| Q9BT78 | 1 | 1    | 0.9  | 1    |
| Q9H0E2 | 1 | 0.8  | 0.9  | 1    |
| Q9NUQ9 | 1 | 1.1  | 1.1  | 1.7  |
| Q9UNM6 | 1 | 1.1  | 1.1  | 1    |
| Q9Y5S2 | 1 | 1.4  | 1.5  | 2.1  |
| C9JYI4 | 1 | 1    | 1.2  | 1.2  |
| J3KN16 | 1 | 0.9  | 1.1  | 1.8  |
| 043399 | 1 | 1.4  | 2    | 1.4  |
| P10253 | 1 | 0.9  | 1    | 0.8  |
| P12270 | 1 | 1.2  | 1.3  | 1    |
| P43487 | 1 | 1.11 | 1.11 | 1    |
| P46783 | 1 | 1.3  | 1.2  | 1.8  |
| Q13153 | 1 | 0.5  | 0.5  | 0.7  |
| B1AJV7 | 1 | 0.4  | 0.4  | 0.5  |
| D6RAX2 | 1 | 1    | 1.1  | 0.8  |
| 043396 | 1 | 0.9  | 0.8  | 0.5  |
| P25787 | 1 | 0.7  | 0.5  | 4.2  |
| Q00169 | 1 | 1.1  | 0.8  | 1.1  |
| Q9UKU7 | 1 | 2.6  | 1.1  | 3.1  |
| E9PGI8 | 1 | 0.6  | 0.6  | 1.8  |
| P60983 | 1 | 1    | 0.8  | 1.4  |
| P46109 | 1 | 1.4  | 1.3  | 0.8  |
| B4DHX5 | 1 | 0.8  | 0.6  | 0.4  |
| P84095 | 1 | 0.8  | 0.9  | 4.6  |
| Q7L266 | 1 | 1.5  | 1.2  | 1.1  |
| F5GXS8 | 1 | 0.8  | 1    | 1.6  |
| F8W7I2 | 1 | 3.3  | 0.6  | 0.5  |

|        |   |      |      |      |
|--------|---|------|------|------|
| Q96DG6 | 1 | 1.1  | 0.8  | 0.7  |
| B4E329 | 1 | 1.8  | 1.1  | 1    |
| 075695 | 1 | 1.1  | 1.6  | 1.3  |
| A8KAH5 | 1 | 1.4  | 1.3  | 2.1  |
| G3V2F7 | 1 | 1.3  | 1.1  | 1.3  |
| P05107 | 1 | 1.7  | 1.3  | 6    |
| F5H376 | 1 | 1.2  | 0.6  | 0.7  |
| Q9NZZ3 | 1 | 1.2  | 1.6  | 0.9  |
| Q9UBB6 | 1 | 0.8  | 0.7  | 0.6  |
| Q9Y3A5 | 1 | 1.2  | 0.9  | 1.1  |
| H3BN14 | 1 | 1.2  | 1.1  | 1    |
| E7EM64 | 1 | 1    | 0.8  | 0.7  |
| P31949 | 1 | 0.2  | 1    | 1.3  |
| Q96RF0 | 1 | 1.7  | 1    | 1.4  |
| P62701 | 1 | 0.6  | 1.7  | 0.6  |
| Q9NR31 | 1 | 1.3  | 0.9  | 1.9  |
| Q9UBV8 | 1 | 1    | 1    | 0.9  |
| Q6JUT2 | 1 | 2    | 1.44 | 2    |
| E7ER47 | 1 | 2.22 | 0.89 | 0.56 |
| P05198 | 1 | 0.7  | 1    | 1.5  |
| 000534 | 1 | 0.9  | 1    | 0.8  |
| Q5T1Z0 | 1 | 0.9  | 0.7  | 0.8  |
| P30405 | 1 | 3.1  | 1.2  | 1.6  |
| P04196 | 1 | 1.09 | 2    | 3.91 |
| P07585 | 1 | 0.3  | 0.2  | 0.7  |
| P61225 | 1 | 1.2  | 0.9  | 2.3  |
| B7Z590 | 1 | 1    | 0.7  | 0.5  |
| C9J502 | 1 | 0.5  | 1.1  | 1.1  |
| E5RFX7 | 1 | 1    | 0.9  | 0.9  |
| E7EUD0 | 1 | 1.6  | 0.7  | 0.4  |
| F5H0U5 | 1 | 1.3  | 1    | 1.3  |
| H3BP91 | 1 | 2.3  | 1.7  | 1.3  |
| J3QQN1 | 1 | 1.18 | 1.18 | 1.82 |
| 060234 | 1 | 1.18 | 1.09 | 3    |
| 095571 | 1 | 1.7  | 1    | 1.6  |
| Q7L1Q6 | 1 | 1.1  | 1.1  | 1.6  |
| P00352 | 1 | 1.7  | 1.1  | 0.7  |
| 000232 | 1 | 1    | 0.9  | 1.1  |
| B4DX52 | 1 | 0.9  | 1.6  | 1.3  |
| P30533 | 1 | 1    | 1.9  | 1.4  |
| A8MZ54 | 1 | 0.73 | 0.55 | 0.45 |
| Q9NZB2 | 1 | 1.1  | 1.1  | 1.6  |
| E9PNW4 | 1 | 1.2  | 1    | 1.6  |
| Q13491 | 1 | 2.5  | 1.4  | 0.5  |
| H0YN26 | 1 | 1.1  | 1.7  | 2.1  |
| 060331 | 1 | 1.2  | 1.4  | 0.7  |
| 015145 | 1 | 1.4  | 1.3  | 0.9  |

|        |   |      |      |      |
|--------|---|------|------|------|
| B4DG46 | 1 | 1.4  | 0.4  | 2.5  |
| Q2TAY7 | 1 | 0.8  | 0.8  | 0.4  |
| Q16543 | 1 | 0.8  | 1    | 0.9  |
| F8W7Q4 | 1 | 1    | 0.8  | 2.5  |
| C9J1F6 | 1 | 1.5  | 1.3  | 1    |
| C9JDR0 | 1 | 1.3  | 2    | 0.9  |
| D6RGV5 | 1 | 1.5  | 1.1  | 0.5  |
| 095822 | 1 | 0.9  | 0.7  | 0.7  |
| A6NJA2 | 1 | 0.9  | 0.9  | 0.7  |
| B0QZ18 | 1 | 1.3  | 1    | 1.8  |
| B3KS98 | 1 | 1.1  | 1.2  | 1.9  |
| B4DJS7 | 1 | 0.9  | 1    | 1.5  |
| B7ZL00 | 1 | 0.8  | 1    | 1.9  |
| E1P5S2 | 1 | 0.9  | 1.2  | 1.7  |
| E9PCI9 | 1 | 1.09 | 0.82 | 0.91 |
| E9PPH5 | 1 | 0.9  | 0.9  | 2.7  |
| F5GYF7 | 1 | 0.8  | 0.7  | 0.9  |
| F5H0J4 | 1 | 1.5  | 1.1  | 1    |
| F8VXJ7 | 1 | 1    | 1.3  | 2.3  |
| G3V3C7 | 1 | 1.1  | 0.9  | 0.9  |
| 014495 | 1 | 4.7  | 2.3  | 1.2  |
| 015075 | 1 | 0.6  | 0.7  | 0.7  |
| 043765 | 1 | 1    | 1.5  | 1.9  |
| 095671 | 1 | 1.4  | 1    | 1.5  |
| 096000 | 1 | 1.4  | 1.1  | 1.1  |
| P20039 | 1 | 1.1  | 3.8  | 2.6  |
| P22033 | 1 | 1.1  | 1.3  | 1.4  |
| P26368 | 1 | 1    | 1.4  | 1    |
| P30520 | 1 | 0.89 | 0.67 | 1.33 |
| P48163 | 1 | 1    | 1.8  | 0.6  |
| P51858 | 1 | 0.9  | 1.4  | 1.4  |
| P53621 | 1 | 1.1  | 1.2  | 1.8  |
| P62333 | 1 | 1    | 1    | 1    |
| Q06124 | 1 | 1.2  | 1    | 1    |
| Q13636 | 1 | 1.6  | 1.6  | 3.4  |
| Q86TP1 | 1 | 0.7  | 0.7  | 0.6  |
| Q8TBC4 | 1 | 0.9  | 0.9  | 0.8  |
| Q8TCD5 | 1 | 1.3  | 0.8  | 1.3  |
| Q92905 | 1 | 1    | 0.8  | 0.8  |
| Q9H479 | 1 | 0.9  | 0.6  | 0.8  |
| Q9NQE9 | 1 | 1.3  | 1.3  | 1.3  |
| Q9NQW6 | 1 | 1.5  | 0.6  | 1    |
| Q9Y6U3 | 1 | 0.9  | 1.6  | 2.3  |
| B5MCW2 | 1 | 0.82 | 1.27 | 1.45 |
| C9JFE4 | 1 | 0.9  | 0.7  | 1    |
| E9PHI6 | 1 | 1.2  | 1.1  | 1.6  |
| P26373 | 1 | 0.6  | 1.1  | 4.2  |



|        |   |      |      |      |
|--------|---|------|------|------|
| P46108 | 1 | 1.89 | 1    | 0.89 |
| P56556 | 1 | 1.2  | 0.8  | 1    |
| P62081 | 1 | 1.1  | 1.3  | 1.2  |
| Q08945 | 1 | 1.4  | 1.7  | 1.2  |
| Q8WXF1 | 1 | 1.2  | 1.2  | 1.1  |
| Q92945 | 1 | 1    | 1.9  | 2.4  |
| Q9NQ66 | 1 | 1.3  | 0.9  | 0.8  |
| Q9Y285 | 1 | 0.9  | 0.8  | 0.7  |
| B7Z5Z2 | 1 | 1.3  | 0.8  | 1    |
| E9PEW9 | 1 | 1.3  | 1    | 1.2  |
| F5H365 | 1 | 1    | 0.8  | 1.1  |
| P43155 | 1 | 2.2  | 2    | 1.8  |
| G8JLH9 | 1 | 0.9  | 0.9  | 1.5  |
| P26196 | 1 | 1.4  | 1.3  | 1    |
| P56192 | 1 | 0.9  | 0.9  | 1.3  |
| P62424 | 1 | 0.9  | 1.7  | 3.6  |
| Q6NVY1 | 1 | 1.4  | 0.7  | 1.1  |
| A6NFN2 | 1 | 1.3  | 1.3  | 1.3  |
| B3KXW5 | 1 | 0.8  | 0.8  | 0.6  |
| 000533 | 1 | 1.6  | 1.1  | 0.9  |
| J3KQ73 | 1 | 1.3  | 1    | 1.4  |
| Q9Y512 | 1 | 1.3  | 1.1  | 1.4  |
| B2R5P6 | 1 | 0.8  | 0.7  | 1.8  |
| B4DGX2 | 1 | 1.18 | 1    | 0.82 |
| G3V3Y1 | 1 | 0.73 | 0.45 | 0.73 |
| 075223 | 1 | 1    | 0.8  | 1.9  |
| B7Z7Q0 | 1 | 1.8  | 1.5  | 0.6  |
| Q96FN4 | 1 | 0.9  | 0.9  | 1.1  |
| Q9GZP4 | 1 | 0.9  | 0.6  | 0.5  |
| P39019 | 1 | 0.9  | 1.8  | 2.8  |
| Q14160 | 1 | 1.3  | 1.5  | 1.2  |
| Q96CN7 | 1 | 1.3  | 1.2  | 1.4  |
| D6RF12 | 1 | 1.6  | 1.2  | 1.1  |
| F8W8T1 | 1 | 0.6  | 1.3  | 1    |
| P14621 | 1 | 1.7  | 0.9  | 1    |
| Q96L92 | 1 | 1.2  | 1.2  | 2.1  |
| Q9UHG2 | 1 | 0.4  | 0.4  | 0.7  |
| Q9UPT5 | 1 | 1.2  | 1.1  | 1.1  |
| P09488 | 1 | 0.7  | 0.7  | 2.2  |
| Q9NVJ2 | 1 | 1.6  | 1.6  | 1.2  |
| H7C5Q2 | 1 | 1.9  | 1.5  | 0.7  |
| F5H2F2 | 1 | 1.3  | 2.6  | 6.3  |
| E9PL82 | 1 | 0.9  | 1.6  | 0.5  |
| P54727 | 1 | 1.1  | 1.5  | 0.7  |
| B4DNJ6 | 1 | 1.09 | 1.36 | 0.55 |
| H0YK46 | 1 | 1.1  | 1.3  | 3.1  |
| E7ENU4 | 1 | 1.1  | 1.5  | 2.5  |

|        |   |      |      |      |
|--------|---|------|------|------|
| P12004 | 1 | 0.6  | 0.8  | 1.8  |
| Q9NV70 | 1 | 0.9  | 1.1  | 1.6  |
| C9JJP5 | 1 | 1.2  | 1.4  | 1.3  |
| Q6NZI2 | 1 | 0.9  | 1.1  | 1.2  |
| Q9H313 | 1 | 2.1  | 1    | 0.8  |
| A8MXP8 | 1 | 1.33 | 1.22 | 1.33 |
| E7EPB3 | 1 | 0.4  | 0.9  | 3.3  |
| P55263 | 1 | 1.2  | 1    | 0.4  |
| Q9UBS4 | 1 | 1    | 1.5  | 0.83 |
| Q15393 | 1 | 1    | 1.3  | 0.9  |
| P49257 | 1 | 1.36 | 1.36 | 1.45 |
| F5H2U1 | 1 | 1.7  | 1.2  | 1.5  |
| P29590 | 1 | 1.2  | 1.5  | 2.1  |
| Q02818 | 1 | 1.1  | 1.6  | 1.6  |
| Q9UJY1 | 1 | 1.5  | 1    | 1    |
| A2RRF3 | 1 | 1.1  | 1.1  | 0.6  |
| 095373 | 1 | 1.7  | 1.6  | 0.7  |
| Q9NQR4 | 1 | 1.1  | 0.5  | 0.8  |
| B1AHD1 | 1 | 1.5  | 1.5  | 2.2  |
| D6RAT0 | 1 | 0.9  | 1.4  | 1.8  |
| E9PFN5 | 1 | 1.3  | 2.2  | 2.2  |
| P23434 | 1 | 2.6  | 1.5  | 0.9  |
| P49770 | 1 | 1.08 | 1.17 | 1.17 |
| P61960 | 1 | 0.5  | 0.6  | 1    |
| P62857 | 1 | 1.55 | 1.91 | 1.45 |
| Q7L775 | 1 | 0.8  | 0.8  | 0.8  |
| Q8IU85 | 1 | 1.6  | 0.9  | 0.8  |
| Q8NHG7 | 1 | 1.9  | 0.8  | 1.6  |
| Q9BRF8 | 1 | 0.8  | 1.3  | 0.7  |
| Q9UBI6 | 1 | 1.7  | 3.8  | 0.8  |
| Q9NZR1 | 1 | 2.09 | 1.45 | 0.45 |
| D6RAN4 | 1 | 1    | 1.3  | 1.6  |
| J3KSZ7 | 1 | 0.6  | 0.8  | 1.1  |
| H3BPE7 | 1 | 2.3  | 2.4  | 1.3  |
| E7ESZ7 | 1 | 1.1  | 1.1  | 2.3  |
| P62330 | 1 | 1.5  | 1    | 1.6  |
| Q658P3 | 1 | 0.6  | 0.9  | 1.2  |
| Q96FJ2 | 1 | 1.1  | 1.4  | 0.3  |
| F5H0J3 | 1 | 1.2  | 0.8  | 0.9  |
| Q9H3N1 | 1 | 1.27 | 1.27 | 1.82 |
| P53680 | 1 | 1.3  | 1.2  | 0.9  |
| B0QYF8 | 1 | 0.9  | 0.9  | 2.4  |
| P49006 | 1 | 4.8  | 2.8  | 2.4  |
| Q96A65 | 1 | 1.2  | 1    | 0.9  |
| Q9UHD1 | 1 | 0.6  | 0.8  | 1    |
| Q9Y6C9 | 1 | 0.9  | 0.8  | 0.7  |
| HOYM70 | 1 | 0.9  | 0.9  | 1.3  |

|        |   |      |      |      |
|--------|---|------|------|------|
| P27694 | 1 | 0.9  | 0.7  | 0.6  |
| 043615 | 1 | 1    | 1.1  | 0.8  |
| P04839 | 1 | 0.7  | 2.2  | 8.4  |
| Q8N573 | 1 | 1.2  | 0.5  | 0.9  |
| E7ENQ6 | 1 | 2.4  | 1.6  | 0.9  |
| J3KMX4 | 1 | 1.1  | 1    | 1.9  |
| Q9NP79 | 1 | 0.73 | 0.82 | 1.09 |
| G3XAJ6 | 1 | 1    | 1.9  | 2.1  |
| B4DFQ6 | 1 | 1.5  | 1.3  | 1.6  |
| P24534 | 1 | 0.9  | 0.6  | 1.9  |
| H3BVG0 | 1 | 1.2  | 1.3  | 0.9  |
| F5H4E4 | 1 | 1.3  | 1    | 0.6  |
| B4DH53 | 1 | 0.8  | 1.4  | 1.6  |
| Q9Y2Z0 | 1 | 1.11 | 0.78 | 1.11 |
| P04181 | 1 | 2    | 0.9  | 1.5  |
| P63218 | 1 | 3.6  | 2.7  | 1.4  |
| 075915 | 1 | 1.1  | 1.8  | 1.1  |
| Q9P2K5 | 1 | 1.3  | 1.4  | 1.3  |
| P56381 | 1 | 2.1  | 1.6  | 1.1  |
| 075936 | 1 | 0.8  | 0.5  | 0.8  |
| Q16348 | 1 | 4.5  | 0.7  | 1.3  |
| B4DHE8 | 1 | 1.2  | 1.1  | 0.5  |
| C9JKQ2 | 1 | 1.7  | 1.4  | 0.8  |
| P05546 | 1 | 0.3  | 1    | 1.1  |
| P23083 | 1 | 0.8  | 2.1  | 1.9  |
| Q9H492 | 1 | 0.8  | 0.8  | 0.5  |
| Q9Y376 | 1 | 1.1  | 1    | 0.6  |
| C9J6P4 | 1 | 1.2  | 1.3  | 4.3  |
| P62277 | 1 | 0.9  | 1.8  | 1.2  |
| B7Z491 | 1 | 1.4  | 1    | 0.9  |
| A6NHG4 | 1 | 1.5  | 1.6  | 1    |
| Q07666 | 1 | 1.2  | 1.6  | 0.8  |
| P09669 | 1 | 0.9  | 0.8  | 0.9  |
| P43686 | 1 | 0.9  | 0.9  | 2.3  |
| Q92888 | 1 | 1.1  | 1.9  | 1.9  |
| 015270 | 1 | 1.7  | 2.1  | 0.8  |
| H0YCN2 | 1 | 1.4  | 1.2  | 1.3  |
| E9PIM6 | 1 | 1    | 1    | 1.2  |
| P27635 | 1 | 1    | 1.7  | 2.9  |
| C9JU1  | 1 | 1.2  | 1.6  | 2    |
| H9KV64 | 1 | 1.7  | 0.9  | 1.3  |
| Q96NW7 | 1 | 1.5  | 1.3  | 1    |
| P02689 | 1 | 2.1  | 1.6  | 1.2  |
| D6RBN5 | 1 | 3.5  | 1.5  | 1.6  |
| C9JOB2 | 1 | 0.9  | 1    | 0.5  |
| E9PE82 | 1 | 1.5  | 1.1  | 1.1  |
| F8WDI0 | 1 | 0.9  | 1.3  | 1.6  |

|        |   |     |     |     |
|--------|---|-----|-----|-----|
| J3KQL8 | 1 | 1.1 | 3.3 | 3   |
| P35270 | 1 | 1.2 | 0.8 | 1.1 |
| Q8N6N7 | 1 | 1.2 | 0.9 | 0.8 |
| E9PMB8 | 1 | 1.8 | 1   | 1.6 |
| E9PL57 | 1 | 0.3 | 0.2 | 2.6 |
| P01033 | 1 | 1.5 | 1.2 | 16  |
| P50897 | 1 | 1.2 | 1.4 | 1.5 |
| Q13442 | 1 | 2   | 2.7 | 1.7 |
| Q15067 | 1 | 2.1 | 1.6 | 1.3 |
| Q6PI78 | 1 | 2.1 | 1.4 | 1.2 |
| Q6YHK3 | 1 | 0.7 | 1   | 0.5 |
| Q96GD0 | 1 | 1   | 0.7 | 0.8 |
| Q9UNS2 | 1 | 1.2 | 1   | 1.2 |
| E9PFH3 | 1 | 1.1 | 1.2 | 1.6 |
| E9PM35 | 1 | 1.6 | 0.7 | 1   |
| P28070 | 1 | 0.7 | 0.8 | 1.1 |
| P62263 | 1 | 1   | 1.4 | 1.6 |
| Q5VZR0 | 1 | 0.8 | 1.1 | 0.9 |
| E5RJ68 | 1 | 1   | 1.3 | 1.2 |
| J3KS22 | 1 | 2.2 | 0.9 | 1.1 |
| B3KUE5 | 1 | 0.8 | 0.8 | 0.8 |
| J3QRS3 | 1 | 1.5 | 1.5 | 2.4 |
| P48147 | 1 | 0.8 | 0.7 | 1.2 |
| P55884 | 1 | 1.6 | 1.6 | 1.4 |
| A8MWR6 | 1 | 1.5 | 1.3 | 1.2 |
| G3V1C3 | 1 | 1.2 | 1.4 | 1.5 |
| 096008 | 1 | 1.4 | 1.5 | 1   |
| Q9NYU2 | 1 | 0.9 | 1   | 1.4 |
| F8VVR9 | 1 | 0.7 | 0.5 | 0.6 |
| Q9UBT2 | 1 | 1.1 | 1.1 | 2.2 |
| Q9UKG1 | 1 | 1.2 | 1.2 | 1.3 |
| P04114 | 1 | 0.8 | 0.7 | 1.1 |
| F8W8M4 | 1 | 1   | 1   | 0.7 |
| A6NNK5 | 1 | 0.9 | 0.9 | 0.9 |
| Q5VWZ2 | 1 | 1.2 | 0.9 | 0.8 |
| Q8N8S7 | 1 | 1.3 | 1.9 | 1.1 |
| C9J574 | 1 | 1.3 | 1.4 | 0.8 |
| F8W6G1 | 1 | 1.1 | 1.1 | 0.5 |
| P17931 | 1 | 1   | 1.1 | 2.9 |
| Q14258 | 1 | 1.1 | 1.8 | 0.9 |
| Q15126 | 1 | 1.1 | 1   | 1.9 |
| A6NDG6 | 1 | 1.4 | 0.9 | 1   |
| B4DXZ6 | 1 | 1.3 | 1   | 1.3 |
| C9JAF2 | 1 | 0.4 | 0.4 | 0.7 |
| P13671 | 1 | 0.7 | 0.9 | 2.8 |
| B2CZX2 | 1 | 1.2 | 0.8 | 0.6 |
| HOYGW7 | 1 | 2.4 | 1.6 | 1.5 |

|        |   |      |      |      |
|--------|---|------|------|------|
| P08572 | 1 | 0.3  | 0.3  | 3.4  |
| P49458 | 1 | 1.6  | 0.9  | 2    |
| P41091 | 1 | 0.9  | 1.2  | 1.6  |
| P02792 | 1 | 1.6  | 1.1  | 1.8  |
| Q9NT99 | 1 | 1.8  | 1.3  | 1    |
| P01620 | 1 | 0.6  | 1.5  | 1.7  |
| E7ENA9 | 1 | 1.5  | 1.4  | 1.3  |
| Q96BM9 | 1 | 1.3  | 1.3  | 1    |
| B1AK13 | 1 | 1.3  | 1.7  | 1.1  |
| O76024 | 1 | 0.8  | 0.9  | 1.3  |
| E9PJD9 | 1 | 0.9  | 2.1  | 1.3  |
| P01111 | 1 | 1.1  | 1    | 1.2  |
| B4E220 | 1 | 5.7  | 1.3  | 1.6  |
| Q16363 | 1 | 0.9  | 0.9  | 4.4  |
| B4DU60 | 1 | 1.1  | 0.6  | 1.2  |
| O60271 | 1 | 1.1  | 1.3  | 0.9  |
| B4DER1 | 1 | 1.2  | 1.2  | 2.2  |
| B4DXI8 | 1 | 0.5  | 0.7  | 2.4  |
| B7Z2T9 | 1 | 3.9  | 1.2  | 1    |
| D3YTF8 | 1 | 1.5  | 1.1  | 2.1  |
| E5RFP0 | 1 | 0.6  | 0.5  | 1.4  |
| E5RIZ6 | 1 | 0.6  | 1    | 1.6  |
| E9PFR3 | 1 | 1.1  | 1.3  | 1.5  |
| F5H355 | 1 | 1.6  | 1    | 0.5  |
| F6SKB8 | 1 | 0.8  | 0.9  | 1.2  |
| F8VUA6 | 1 | 0.9  | 1.7  | 3.4  |
| G3V1L9 | 1 | 2.2  | 1.6  | 1.1  |
| H0YLG5 | 1 | 1.6  | 1.3  | 1.4  |
| H3BND3 | 1 | 1.2  | 1.5  | 0.9  |
| H3BPK3 | 1 | 1.44 | 1    | 1    |
| H3BS86 | 1 | 0.9  | 1    | 1.1  |
| O14880 | 1 | 1    | 0.8  | 1.4  |
| O14964 | 1 | 1.1  | 0.9  | 1.1  |
| O60443 | 1 | 1.2  | 1.1  | 1.2  |
| O95182 | 1 | 0.6  | 0.6  | 1.1  |
| O95747 | 1 | 1    | 1.11 | 1.33 |
| P00167 | 1 | 1.2  | 1.2  | 1.4  |
| P00492 | 1 | 0.6  | 0.5  | 0.7  |
| P08311 | 1 | 0.7  | 0.8  | 14   |
| P55145 | 1 | 1.36 | 2.73 | 1.18 |
| P62854 | 1 | 1    | 1.8  | 2    |
| Q14353 | 1 | 0.64 | 0.64 | 0.73 |
| Q15404 | 1 | 0.9  | 1    | 1.1  |
| Q15459 | 1 | 0.9  | 1.4  | 1.6  |
| Q16740 | 1 | 1.64 | 1.36 | 1.55 |
| Q8N766 | 1 | 1.2  | 1.3  | 1.3  |
| Q96EM0 | 1 | 0.9  | 0.6  | 0.8  |

|        |   |      |      |      |
|--------|---|------|------|------|
| Q96NY7 | 1 | 0.6  | 0.4  | 0.9  |
| Q9H444 | 1 | 1.3  | 1.5  | 2.7  |
| Q9Y2V2 | 1 | 0.5  | 0.6  | 0.6  |
| Q9Y4G8 | 1 | 0.6  | 0.5  | 0.7  |
| B4E2S7 | 1 | 1.7  | 2.6  | 1.1  |
| I3NI00 | 1 | 0.64 | 0.73 | 2.91 |
| Q92900 | 1 | 0.9  | 0.9  | 1.9  |
| C9IZQ1 | 1 | 1.4  | 2    | 1.4  |
| H3BQZ9 | 1 | 1.1  | 1.8  | 0.6  |
| G3XAC4 | 1 | 1.2  | 1.4  | 0.8  |
| P05413 | 1 | 0.7  | 0.8  | 1.5  |
| E9PDL2 | 1 | 2    | 1.33 | 0.33 |
| B7Z7P8 | 1 | 0.8  | 0.8  | 1.1  |
| J3KNX9 | 1 | 1.7  | 1.5  | 0.7  |
| 000625 | 1 | 0.6  | 0.5  | 0.8  |
| P67870 | 1 | 0.9  | 1    | 1.2  |
| 095168 | 1 | 1.3  | 0.7  | 1    |
| P13647 | 1 | 1.3  | 1.2  | 1    |
| H7C410 | 1 | 1.7  | 5.2  | 2.8  |
| E7EU96 | 1 | 1.1  | 1.2  | 1.4  |
| A6PVN5 | 1 | 1.11 | 0.89 | 1.56 |
| E2QRM6 | 1 | 1.1  | 0.7  | 0.8  |
| F5H425 | 1 | 1.1  | 1.1  | 1.1  |
| 015498 | 1 | 1.3  | 1.4  | 1    |
| Q15293 | 1 | 2    | 2    | 2.2  |
| J3KNM0 | 1 | 1.2  | 0.9  | 1.5  |
| E7ENJ6 | 1 | 1.1  | 1.3  | 1.1  |
| B7WP84 | 1 | 1    | 0.9  | 0.7  |
| B4DST5 | 1 | 1.1  | 1.3  | 1    |
| P50583 | 1 | 0.9  | 0.8  | 0.9  |
| P01116 | 1 | 0.82 | 0.82 | 1.36 |
| P41218 | 1 | 0.9  | 1.2  | 3.9  |
| G3V153 | 1 | 1    | 1.2  | 1.2  |
| C9JT23 | 1 | 1.3  | 0.9  | 0.4  |
| Q5R370 | 1 | 1.1  | 1.1  | 1.8  |
| H0Y2Y8 | 1 | 0.7  | 2.5  | 11.1 |
| B4DQV7 | 1 | 0.7  | 1.1  | 2    |
| Q13576 | 1 | 0.7  | 0.7  | 0.9  |
| Q9Y3U8 | 1 | 1    | 1.8  | 1.5  |
| E2QRD5 | 1 | 0.9  | 1.1  | 1.9  |
| Q96E39 | 1 | 1.2  | 2    | 1.4  |
| A6NIW1 | 1 | 3.3  | 2.2  | 1    |
| Q6PCB0 | 1 | 0.3  | 0.4  | 0.6  |
| H7BXF3 | 1 | 1.2  | 1.6  | 1.2  |
| H3BPF6 | 1 | 1.4  | 0.9  | 2.5  |
| P04433 | 1 | 0.7  | 2.3  | 3.5  |
| D3YTA9 | 1 | 2    | 1.7  | 0.9  |

|               |          |            |            |            |
|---------------|----------|------------|------------|------------|
| <b>G3V4U0</b> | <b>1</b> | <b>0.5</b> | <b>0.4</b> | <b>0.6</b> |
| G3V2L6        | 1        | 0.7        | 0.6        | 1          |
| I3L4J1        | 1        | 0.8        | 0.9        | 1.1        |
| 043143        | 1        | 1.4        | 1.3        | 1.3        |
| Q92616        | 1        | 1.3        | 1.6        | 1.1        |
| B7Z1I0        | 1        | 0.6        | 0.7        | 0.8        |
| Q9UQ35        | 1        | 0.8        | 1.2        | 1.8        |
| Q9BUH6        | 1        | 1.3        | 1.3        | 2.5        |
| E9PG35        | 1        | 1.6        | 1.4        | 1.4        |
| E9PLX3        | 1        | 1.2        | 1.2        | 2.1        |
| P41208        | 1        | 1          | 0.8        | 0.8        |
| 000116        | 1        | 1.4        | 1.5        | 2.2        |
| F8VZZ2        | 1        | 1.3        | 1          | 1.1        |
| Q5LJA5        | 1        | 1.44       | 1.33       | 0.78       |
| A6NMA8        | 1        | 1.4        | 1.1        | 1          |
| P11279        | 1        | 1.2        | 1.2        | 1.4        |
| B1AH49        | 1        | 1.7        | 1.1        | 1.4        |
| F5H3I5        | 1        | 1          | 1.7        | 1.3        |
| Q96SB3        | 1        | 1.4        | 2          | 1.1        |
| Q9BY32        | 1        | 1          | 1.8        | 1.3        |
| 095989        | 1        | 1.1        | 0.9        | 0.4        |
| F5H8L6        | 1        | 1.3        | 0.9        | 0.8        |
| B7Z952        | 1        | 0.6        | 0.7        | 0.4        |
| E9PNG0        | 1        | 1.5        | 1.5        | 1.6        |
| P61077        | 1        | 0.7        | 0.7        | 1.3        |
| Q9HCJ6        | 1        | 1.2        | 2.1        | 0.8        |
| P46782        | 1        | 0.9        | 1.5        | 3.7        |
| B0QY89        | 1        | 0.9        | 1.3        | 1          |
| Q86Y56        | 1        | 1          | 1.2        | 0.6        |
| <b>F5H1F3</b> | <b>1</b> | <b>0.4</b> | <b>0.1</b> | <b>0.2</b> |
| F5H6P7        | 1        | 1          | 1.6        | 0.9        |
| 000629        | 1        | 0.8        | 0.9        | 0.6        |
| P02654        | 1        | 0.6        | 1.3        | 0.8        |
| A8MVM2        | 1        | 0.3        | 0.2        | 0.2        |
| Q96EK5        | 1        | 0.9        | 0.8        | 0.7        |
| 015355        | 1        | 1.1        | 1          | 1          |
| P51452        | 1        | 0.7        | 0.5        | 2.7        |
| B4DNW0        | 1        | 1          | 0.7        | 1          |
| Q9UL25        | 1        | 1.6        | 1.6        | 0.9        |
| B1AK40        | 1        | 2.4        | 1.7        | 0.8        |
| B1APY8        | 1        | 1.1        | 1.3        | 1.2        |
| Q9NRF8        | 1        | 0.8        | 0.8        | 1          |
| P59665        | 1        | 1.6        | 1.7        | 21.1       |
| B4DIZ2        | 1        | 1          | 0.7        | 1.1        |
| 000170        | 1        | 0.8        | 0.7        | 1.1        |
| Q5VYL6        | 1        | 0.4        | 1.5        | 3          |
| P19652        | 1        | 1          | 1.5        | 1.7        |

|        |   |      |      |      |
|--------|---|------|------|------|
| Q7L0J3 | 1 | 0.4  | 1.1  | 1.9  |
| Q86SK9 | 1 | 1.44 | 1.11 | 1.78 |
| Q8IYI6 | 1 | 1.7  | 0.9  | 1.5  |
| F5H577 | 1 | 2.2  | 2.1  | 0.7  |
| I3L505 | 1 | 1.9  | 1.1  | 0.3  |
| B7Z1N7 | 1 | 1.8  | 3    | 2.3  |
| P07919 | 1 | 0.9  | 1    | 0.6  |
| P17050 | 1 | 0.7  | 0.6  | 1    |
| Q6Y288 | 1 | 0.8  | 1.3  | 0.9  |
| B4DDM6 | 1 | 1    | 1    | 2.1  |
| P61601 | 1 | 1.4  | 2.3  | 0.4  |
| P20774 | 1 | 1    | 1.1  | 1.6  |
| E7EVV3 | 1 | 0.5  | 0.5  | 0.8  |
| E9PC52 | 1 | 6.6  | 1.5  | 0.8  |
| E7EPM0 | 1 | 0.8  | 0.9  | 3.4  |
| P37108 | 1 | 1    | 1.3  | 1.7  |
| Q14677 | 1 | 1.3  | 1.2  | 1    |
| B4DZ15 | 1 | 0.9  | 0.5  | 0.5  |
| F8VPJ2 | 1 | 3.2  | 1.3  | 0.3  |
| A8MU27 | 1 | 0.9  | 0.9  | 1.7  |
| BOYIW2 | 1 | 0.6  | 1.4  | 1.8  |
| B4DT35 | 1 | 0.9  | 0.9  | 0.9  |
| C9JNW5 | 1 | 1    | 0.9  | 2.2  |
| E9PAV3 | 1 | 1.1  | 2    | 1.7  |
| F8W8D6 | 1 | 2.9  | 1    | 0.5  |
| 000483 | 1 | 2.1  | 1.5  | 0.5  |
| P50150 | 1 | 1.2  | 1.3  | 0.7  |
| P56385 | 1 | 1.5  | 1.2  | 0.7  |
| Q6UXB8 | 1 | 2.4  | 1.2  | 0.2  |
| Q7Z3B1 | 1 | 1.2  | 1.1  | 0.4  |
| Q8NF37 | 1 | 0.8  | 1.9  | 2.1  |
| Q9H3Z4 | 1 | 3.1  | 3.2  | 1.2  |
| P80748 | 1 | 0.5  | 1.3  | 2.9  |
| Q9NRX4 | 1 | 0.6  | 0.6  | 2.5  |
| P54725 | 1 | 1    | 1.3  | 1    |
| B4DHD4 | 1 | 0.8  | 1.4  | 1.7  |
| HOYKU1 | 1 | 0.7  | 0.9  | 2    |
| B2RP62 | 1 | 1.3  | 0.9  | 1.5  |
| Q709C8 | 1 | 1.3  | 1.1  | 0.6  |
| A2A2M0 | 1 | 0.9  | 1.1  | 1.3  |
| A6NCQ0 | 1 | 2.3  | 1.8  | 0.9  |
| A8MXY0 | 1 | 2.7  | 2    | 2    |
| BOQY01 | 1 | 1.2  | 1    | 0.8  |
| BOVOL0 | 1 | 1.1  | 1    | 1.7  |
| B1AKR6 | 1 | 2    | 1.6  | 0.8  |
| B3KRI2 | 1 | 0.9  | 0.9  | 0.8  |
| B4DDW0 | 1 | 1.3  | 1.1  | 1.7  |



|        |   |     |     |     |
|--------|---|-----|-----|-----|
| B4DVY1 | 1 | 1   | 1.1 | 0.9 |
| B4E1G6 | 1 | 1.2 | 1   | 2.1 |
| B7Z4U7 | 1 | 0.7 | 0.8 | 1.3 |
| B7ZAM9 | 1 | 1.2 | 1.1 | 1.1 |
| C9J3D7 | 1 | 1.3 | 1.3 | 0.8 |
| C9JB50 | 1 | 1.4 | 1.6 | 2.1 |
| C9JCN0 | 1 | 0.6 | 0.7 | 1.5 |
| E5RGR0 | 1 | 0.9 | 1   | 2   |
| E9PB14 | 1 | 1.7 | 0.9 | 1.4 |
| E9PFR7 | 1 | 1.1 | 1.1 | 0.7 |
| F2Z2Y6 | 1 | 1.4 | 1.6 | 1.9 |
| F5GZD0 | 1 | 0.7 | 0.7 | 0.7 |
| F5H025 | 1 | 0.6 | 0.5 | 0.8 |
| F5H7K4 | 1 | 0.7 | 0.8 | 2   |
| F8VQE1 | 1 | 0.9 | 2.1 | 2.3 |
| F8VQQ3 | 1 | 1   | 0.9 | 1.1 |
| G3V2S6 | 1 | 0.7 | 0.7 | 1.4 |
| H3BSW0 | 1 | 1   | 0.8 | 1.3 |
| H7BZM7 | 1 | 1.2 | 1.1 | 1.5 |
| J3KN36 | 1 | 1.2 | 1.8 | 1.8 |
| J3QRU8 | 1 | 0.8 | 0.9 | 0.9 |
| 014879 | 1 | 1.6 | 1.1 | 0.9 |
| 043678 | 1 | 1.2 | 1.1 | 1.2 |
| P26022 | 1 | 1.1 | 3.4 | 8.7 |
| P26885 | 1 | 1.2 | 1.2 | 1.6 |
| P41217 | 1 | 1.4 | 0.9 | 0.8 |
| P61201 | 1 | 1   | 0.8 | 1.3 |
| Q9BXJ0 | 1 | 0.5 | 0.3 | 0.7 |
| Q9NS86 | 1 | 1.1 | 0.8 | 1.2 |
| Q9P2B2 | 1 | 1.3 | 2.7 | 1.8 |
| Q9Y240 | 1 | 0.2 | 0.1 | 0.2 |
| Q9Y3D6 | 1 | 1.7 | 1.2 | 1.5 |
| E7ESC6 | 1 | 1   | 1.2 | 1.2 |
| E7EUG3 | 1 | 1.2 | 1   | 1.6 |
| Q99598 | 1 | 1.1 | 0.9 | 0.9 |
| 015173 | 1 | 1.4 | 1.7 | 1.3 |
| Q9Y6N5 | 1 | 0.8 | 1.7 | 1.4 |
| G3V1X9 | 1 | 1.3 | 2.6 | 0.9 |
| E9PGT6 | 1 | 1   | 0.8 | 1.8 |
| Q10713 | 1 | 1.1 | 1.2 | 2.5 |
| P48059 | 1 | 1   | 1   | 0.9 |
| B5MCC7 | 1 | 1   | 0.8 | 1.5 |
| E9PJJ5 | 1 | 1.2 | 1.9 | 1.3 |
| B4E2Z0 | 1 | 3.9 | 2.1 | 1.5 |
| G5E9L4 | 1 | 1.5 | 1.4 | 1.7 |
| P28072 | 1 | 0.9 | 0.7 | 1.8 |
| P36404 | 1 | 1.3 | 0.9 | 0.7 |

|        |   |     |     |     |
|--------|---|-----|-----|-----|
| Q92896 | 1 | 1.3 | 1.2 | 1.7 |
| B4DK66 | 1 | 0.7 | 1.3 | 0.4 |
| E9PLW6 | 1 | 0.9 | 0.7 | 0.7 |
| F5H1W7 | 1 | 1.6 | 1.4 | 1.5 |
| G3V1U4 | 1 | 1.1 | 1.2 | 2.1 |
| P10155 | 1 | 1.5 | 1.8 | 1.1 |
| Q00688 | 1 | 1.4 | 1.1 | 1.9 |
| E7EMD0 | 1 | 0.9 | 1   | 1.2 |
| Q96PY5 | 1 | 1.4 | 0.9 | 1.1 |
| B7Z7A5 | 1 | 1   | 1.2 | 0.6 |
| Q9P265 | 1 | 1.2 | 1.2 | 1.6 |
| Q8NC51 | 1 | 0.9 | 2.7 | 4.1 |
| P19623 | 1 | 0.9 | 1   | 1.1 |
| Q9Y3B4 | 1 | 1   | 1.1 | 1.2 |
| Q8TB36 | 1 | 1.5 | 1   | 0.8 |
| B8ZZY2 | 1 | 0.9 | 0.8 | 1   |
| H3BUU8 | 1 | 1.6 | 1.2 | 1   |
| F5GX23 | 1 | 0.9 | 1.1 | 1.8 |
| B5MC72 | 1 | 0.9 | 0.6 | 1.2 |
| B4E2C0 | 1 | 1.4 | 1.1 | 0.9 |
| Q9HCD5 | 1 | 1.8 | 1.8 | 1.5 |
| B0QYG7 | 1 | 0.9 | 1.1 | 0.9 |
| E9PFD7 | 1 | 3.7 | 2.2 | 2.5 |
| Q5T6V5 | 1 | 0.6 | 0.7 | 0.8 |
| Q01650 | 1 | 1.5 | 1   | 1.7 |
| Q01081 | 1 | 1   | 1.4 | 1.5 |
| J3KRX5 | 1 | 0.8 | 1.4 | 1.7 |
| Q9UMY4 | 1 | 1.1 | 0.8 | 1.8 |
| Q96N66 | 1 | 0.6 | 0.9 | 1.3 |
| Q9NW15 | 1 | 1.5 | 1.2 | 0.5 |
| Q15006 | 1 | 1.2 | 1   | 1.5 |
| Q9Y6K8 | 1 | 0.7 | 0.3 | 0.4 |
| Q6YP21 | 1 | 2.5 | 2   | 1   |
| HOYNE9 | 1 | 1.9 | 1.6 | 2.9 |
| 000507 | 1 | 1.2 | 1.1 | 1   |
| Q13459 | 1 | 1.4 | 1.6 | 1.4 |
| HOY9Y3 | 1 | 0.4 | 0.4 | 0.2 |
| Q9H1E3 | 1 | 3.5 | 5.3 | 1.5 |
| Q8NE62 | 1 | 2.8 | 1.4 | 1   |
| F5H4B6 | 1 | 1.3 | 2.1 | 1.2 |
| C9JF58 | 1 | 0.5 | 0.4 | 0.3 |
| HOYKC5 | 1 | 1.8 | 1.1 | 1.7 |
| G5E9Z8 | 1 | 0.9 | 1.1 | 1.7 |
| A6NKV8 | 1 | 1.3 | 3.1 | 0.9 |
| Q9BVA0 | 1 | 0.8 | 0.7 | 1.4 |
| D6RCDO | 1 | 1.3 | 1.4 | 1.6 |
| Q6UB35 | 1 | 1.6 | 1.5 | 0.9 |

|        |   |     |     |     |
|--------|---|-----|-----|-----|
| Q9HBT6 | 1 | 4.3 | 1   | 0.8 |
| P51888 | 1 | 0.8 | 0.5 | 1   |
| F5GWU7 | 1 | 0.9 | 0.9 | 1.6 |
| F5H2A7 | 1 | 1   | 0.9 | 1.4 |
| P09012 | 1 | 0.9 | 1.4 | 1.5 |
| Q2M389 | 1 | 1.2 | 1.3 | 1.3 |
| Q8N335 | 1 | 1.6 | 1   | 1.4 |
| Q92820 | 1 | 0.9 | 1.7 | 2.1 |
| Q9UBB4 | 1 | 1.6 | 1.3 | 1   |
| 075533 | 1 | 1.2 | 1.8 | 1.5 |
| Q9NZJ9 | 1 | 1.5 | 0.9 | 0.6 |
| 060831 | 1 | 0.9 | 2   | 1.2 |
| B4DDF4 | 1 | 0.7 | 0.6 | 3   |
| B4DK71 | 1 | 1.4 | 1.7 | 1.2 |
| P68402 | 1 | 0.9 | 0.5 | 0.9 |
| E7ETU9 | 1 | 5.2 | 1.5 | 14  |
| C9JK10 | 1 | 5.1 | 1.3 | 1.4 |
| P10619 | 1 | 0.8 | 1.6 | 1   |
| Q9NRZ7 | 1 | 1.8 | 1.2 | 1   |
| Q9UNW9 | 1 | 1.2 | 1.3 | 1.7 |
| P43652 | 1 | 0.7 | 1.5 | 2.9 |
| C9JHR8 | 1 | 1.3 | 1.4 | 3   |
| Q92621 | 1 | 1.2 | 1.3 | 3   |
| Q9UBR2 | 1 | 1.2 | 1.3 | 2.8 |
| P07305 | 1 | 1.1 | 1.1 | 0.9 |
| C9JRP8 | 1 | 0.6 | 0.6 | 0.9 |
| C9JJX6 | 1 | 0.8 | 0.5 | 0.5 |
| H0Y599 | 1 | 2   | 1   | 1.1 |
| 060678 | 1 | 1.1 | 1.3 | 1.3 |
| 014949 | 1 | 1   | 1   | 1.6 |
| J9JIE9 | 1 | 1.1 | 0.7 | 0.4 |
| B4E3W0 | 1 | 1.5 | 1.4 | 1.3 |
| P26583 | 1 | 1.8 | 3.6 | 2.9 |
| Q53GG5 | 1 | 0.7 | 0.9 | 2   |
| Q96GA7 | 1 | 1.2 | 0.7 | 0.9 |
| Q9P258 | 1 | 1.5 | 1   | 1   |
| H3BUQ9 | 1 | 1.5 | 0.8 | 2.1 |
| P62888 | 1 | 0.7 | 1.5 | 1.8 |
| B4DE40 | 1 | 1.2 | 1.7 | 3.9 |
| F8WD04 | 1 | 1.3 | 0.8 | 0.4 |
| B3KSQ1 | 1 | 1.4 | 1.4 | 0.8 |
| G3V0G5 | 1 | 0.7 | 1   | 1.2 |
| Q13057 | 1 | 1.6 | 0.8 | 0.7 |
| A2T926 | 1 | 1.4 | 1.8 | 1.7 |
| Q3ZCQ8 | 1 | 2   | 2.6 | 0.5 |
| A6NHH0 | 1 | 1.3 | 1.2 | 2.2 |
| A8MYV2 | 1 | 1.2 | 1.6 | 1.6 |

|        |   |     |     |     |
|--------|---|-----|-----|-----|
| B4DTE8 | 1 | 1.4 | 3.1 | 3.1 |
| E5RFY9 | 1 | 0.7 | 1.3 | 0.4 |
| H0YLV5 | 1 | 1.4 | 0.8 | 1.7 |
| B0QYN7 | 1 | 0.7 | 0.9 | 2.2 |
| P01031 | 1 | 0.6 | 1.3 | 3.9 |
| P10586 | 1 | 1.5 | 1.2 | 0.6 |
| Q6P2E9 | 1 | 1.2 | 1.7 | 2.1 |
| P49207 | 1 | 0.6 | 1.9 | 3.1 |
| Q9Y371 | 1 | 1.2 | 1.7 | 1.2 |
| E9PQ57 | 1 | 1   | 1   | 1.6 |
| B7WPD3 | 1 | 1.1 | 1.2 | 0.9 |
| J3QL56 | 1 | 1   | 0.8 | 1.6 |
| 014576 | 1 | 0.7 | 0.7 | 0.8 |
| F5GWR7 | 1 | 1.5 | 1.2 | 0.8 |
| C9JV86 | 1 | 1.2 | 1.6 | 1.8 |
| F5GWP3 | 1 | 0.4 | 0.8 | 0.3 |
| Q96CT7 | 1 | 1.2 | 1.2 | 1.2 |
| Q9BX67 | 1 | 1.1 | 0.7 | 1.4 |
| Q8N3V7 | 1 | 0.5 | 0.9 | 0.8 |
| Q96L34 | 1 | 0.9 | 0.7 | 1.3 |
| Q6UW68 | 1 | 1   | 0.9 | 1   |
| Q8TD22 | 1 | 1.5 | 0.9 | 0.7 |
| Q9H0Q0 | 1 | 0.5 | 0.6 | 1.2 |
| F5GYL8 | 1 | 0.6 | 0.9 | 1   |
| P46778 | 1 | 0.8 | 1.1 | 1.5 |
| 094874 | 1 | 0.9 | 1.1 | 1.6 |
| E7ERD7 | 1 | 1.9 | 1.4 | 2.8 |
| C9JL12 | 1 | 0.6 | 0.5 | 1.1 |
| P11182 | 1 | 1.6 | 0.9 | 1.4 |
| 076031 | 1 | 0.9 | 0.7 | 1.6 |
| Q9UII2 | 1 | 0.7 | 0.5 | 0.5 |
| E9PB70 | 1 | 0.8 | 0.9 | 3.2 |
| Q9UHV9 | 1 | 3.2 | 0.9 | 2.1 |
| E5RGN3 | 1 | 0.9 | 0.5 | 1.7 |
| P61011 | 1 | 1.3 | 1   | 1.5 |
| Q9H6K4 | 1 | 1   | 0.9 | 1.6 |
| H0Y4I7 | 1 | 1.7 | 2.5 | 4   |
| H0YDU8 | 1 | 0.6 | 0.5 | 1.5 |
| F5H293 | 1 | 0.7 | 0.9 | 0.7 |
| P20160 | 1 | 0.6 | 0.5 | 4.4 |
| Q5VVC8 | 1 | 0.9 | 1.2 | 2.2 |
| H3BTV7 | 1 | 2.3 | 2.8 | 1.1 |
| P01766 | 1 | 0.7 | 1.3 | 1.9 |
| Q92556 | 1 | 1   | 0.9 | 1.4 |
| F2Z357 | 1 | 0.9 | 1   | 0.6 |
| E7EN38 | 1 | 0.9 | 0.9 | 1   |
| P23469 | 1 | 1.3 | 1.6 | 0.3 |

|        |   |     |     |     |
|--------|---|-----|-----|-----|
| Q96AG4 | 1 | 1.2 | 1.3 | 1   |
| A0JP02 | 1 | 1.4 | 1.3 | 0.6 |
| A8MQ45 | 1 | 2.8 | 1.5 | 1   |
| A8MUM1 | 1 | 1.4 | 0.9 | 1   |
| A8MV37 | 1 | 0.7 | 0.8 | 1.6 |
| A8MXR0 | 1 | 0.8 | 0.9 | 0.6 |
| B1ANG9 | 1 | 0.7 | 0.7 | 0.8 |
| B3KVR1 | 1 | 1.7 | 2.4 | 0.6 |
| B4DRL5 | 1 | 1.5 | 0.7 | 0.7 |
| B4E3H6 | 1 | 1   | 1.4 | 0.9 |
| B5MC59 | 1 | 0.9 | 0.7 | 1   |
| B7Z468 | 1 | 1.2 | 1.9 | 0.7 |
| B7Z9G5 | 1 | 0.7 | 0.8 | 0.9 |
| C9IYM4 | 1 | 4.1 | 4.5 | 2.2 |
| C9J8T0 | 1 | 1.1 | 1.1 | 1.7 |
| C9JCD9 | 1 | 1   | 0.9 | 1.3 |
| C9JF50 | 1 | 0.7 | 0.7 | 1   |
| C9JRL6 | 1 | 0.6 | 0.6 | 0.8 |
| C9JYN0 | 1 | 3.5 | 1.4 | 1   |
| D6R934 | 1 | 1.6 | 2.3 | 0.6 |
| D6RFH4 | 1 | 1.6 | 1.8 | 3.5 |
| E5RH35 | 1 | 0.9 | 1   | 1.5 |
| E7ENV9 | 1 | 0.9 | 1   | 0.8 |
| E7EUE1 | 1 | 2.7 | 2.7 | 2.4 |
| E7EWP0 | 1 | 1.7 | 1.4 | 0.9 |
| E9PB95 | 1 | 1   | 1.2 | 1.7 |
| E9PCB6 | 1 | 2.2 | 2.3 | 1.3 |
| E9PCG9 | 1 | 0.7 | 0.9 | 0.4 |
| E9PGF9 | 1 | 0.7 | 1.2 | 0.8 |
| E9PIZ3 | 1 | 0.5 | 1.3 | 1.6 |
| E9PJ36 | 1 | 1.2 | 0.9 | 2.6 |
| E9PJF4 | 1 | 1.4 | 1.2 | 1.4 |
| E9PLI5 | 1 | 1   | 1   | 0.9 |
| F5GX77 | 1 | 0.8 | 0.6 | 1.7 |
| F5H2L4 | 1 | 1.6 | 1.2 | 0.7 |
| F5H442 | 1 | 0.8 | 0.7 | 0.7 |
| F5H4W9 | 1 | 0.6 | 1.3 | 1.1 |
| F8VQS7 | 1 | 1.9 | 1.6 | 1   |
| F8W181 | 1 | 1.7 | 1.9 | 3.4 |
| H0YD16 | 1 | 1.1 | 1.2 | 2   |
| H3BP35 | 1 | 0.9 | 1   | 1.9 |
| H7BZG9 | 1 | 1   | 1.2 | 0.2 |
| H7C159 | 1 | 1   | 1.4 | 1.7 |
| I3L2R6 | 1 | 0.9 | 0.7 | 1.4 |
| J3KN10 | 1 | 0.7 | 1   | 1   |
| J3KSP2 | 1 | 0.7 | 1.4 | 4   |
| 000160 | 1 | 0.9 | 0.8 | 4.2 |

|        |   |      |      |      |
|--------|---|------|------|------|
| 000567 | 1 | 1.5  | 1.2  | 1.4  |
| 014494 | 1 | 0.8  | 0.7  | 0.3  |
| 043665 | 1 | 0.5  | 0.7  | 0.7  |
| 075165 | 1 | 1    | 1.3  | 2    |
| 095674 | 1 | 1.7  | 1.2  | 1.3  |
| P01596 | 1 | 0.5  | 2.9  | 3    |
| P01625 | 1 | 0.8  | 2.2  | 3.3  |
| P15927 | 1 | 0.9  | 1    | 0.9  |
| P19388 | 1 | 1    | 1    | 1    |
| P35542 | 1 | 0.9  | 1.6  | 2.8  |
| P47914 | 1 | 0.7  | 3.8  | 5.5  |
| P48507 | 1 | 0.6  | 0.6  | 0.8  |
| Q04941 | 1 | 0.9  | 0.9  | 0.7  |
| Q13618 | 1 | 0.9  | 0.7  | 3.2  |
| Q15056 | 1 | 1.2  | 1.3  | 1.1  |
| Q5QPL9 | 1 | 1.6  | 1.8  | 1.2  |
| Q8N126 | 1 | 0.6  | 1.1  | 0.7  |
| Q8N129 | 1 | 1.1  | 1.5  | 1    |
| Q92882 | 1 | 0.9  | 1    | 2    |
| Q99523 | 1 | 1.2  | 1.6  | 1    |
| Q9BR76 | 1 | 1.2  | 0.9  | 3    |
| Q9BT88 | 1 | 0.6  | 0.7  | 1.1  |
| Q9BTV5 | 1 | 1    | 0.9  | 0.8  |
| Q9HAV7 | 1 | 1.4  | 1.1  | 1.5  |
| Q9NR50 | 1 | 1.1  | 1    | 0.9  |
| Q9NX46 | 1 | 0.9  | 0.9  | 1    |
| Q9UBG0 | 1 | 0.9  | 1.7  | 0.9  |
| Q9UFN0 | 1 | 1.5  | 1.6  | 0.4  |
| Q9UMX5 | 1 | 1.4  | 2.4  | 0.8  |
| Q9Y224 | 1 | 1.2  | 0.9  | 0.6  |
| 060826 | 1 | 0.9  | 1    | 1.4  |
| Q9Y5L4 | 1 | 1.9  | 1.3  | 1.5  |
| 060883 | 1 | 1.2  | 0.3  | 1.4  |
| P04211 | 1 | 0.8  | 1    | 1.7  |
| B0QZ40 | 1 | 1.7  | 1    | 1.5  |
| Q96SZ5 | 1 | 1.6  | 1.4  | 1.8  |
| P01593 | 1 | 0.67 | 3.67 | 3.67 |
| B4E0T7 | 1 | 1.3  | 1.1  | 1.7  |
| Q8NOX7 | 1 | 0.5  | 0.6  | 0.7  |
| B0QYK0 | 1 | 2.2  | 3.6  | 0.9  |
| A6NLF3 | 1 | 1.2  | 1.1  | 0.7  |
| F5H667 | 1 | 1.1  | 0.9  | 1.2  |
| Q9P2X0 | 1 | 0.8  | 1    | 1.5  |
| A6NHK2 | 1 | 0.4  | 0.6  | 8.2  |
| B1AH89 | 1 | 1.3  | 1.1  | 0.9  |
| F5GXR3 | 1 | 1.1  | 1.6  | 1.4  |
| P01700 | 1 | 1.6  | 1.5  | 8.4  |

|        |   |     |     |     |
|--------|---|-----|-----|-----|
| A6NDN0 | 1 | 0.9 | 0.8 | 1.1 |
| A8MYJ1 | 1 | 1.1 | 1.1 | 2   |
| B4DKT0 | 1 | 1   | 1.1 | 1.8 |
| C9JBT1 | 1 | 0.9 | 1   | 1   |
| P02743 | 1 | 0.7 | 1.2 | 1   |
| Q9UDW1 | 1 | 1.7 | 1.3 | 1   |
| C9JQ41 | 1 | 1.6 | 1.5 | 1.6 |
| B7Z831 | 1 | 1.3 | 0.8 | 2.2 |
| A6NCK0 | 1 | 1   | 0.9 | 0.9 |
| P55008 | 1 | 1.4 | 1.9 | 2.5 |
| Q13336 | 1 | 1.6 | 0.6 | 0.8 |
| C9JKI3 | 1 | 0.8 | 1.9 | 2.6 |
| E7EPX7 | 1 | 0.9 | 0.6 | 0.9 |
| Q10570 | 1 | 0.8 | 0.9 | 1.5 |
| A2A283 | 1 | 0.5 | 0.3 | 0.3 |
| H3BP41 | 1 | 0.8 | 0.8 | 0.4 |
| Q9H223 | 1 | 0.5 | 0.9 | 4.6 |
| P37235 | 1 | 1.3 | 1.4 | 0.7 |
| P78356 | 1 | 1.2 | 0.8 | 1.3 |
| B4DJK0 | 1 | 1   | 1.9 | 0.9 |
| H0YA52 | 1 | 1.8 | 1.3 | 1   |
| B7WPG3 | 1 | 0.9 | 0.8 | 1.8 |
| Q9Y4W6 | 1 | 1.3 | 0.8 | 1   |
| F5H157 | 1 | 1.5 | 1.3 | 1.2 |
| F5GWF1 | 1 | 0.8 | 0.7 | 2.8 |
| B7Z341 | 1 | 1.2 | 1   | 0.7 |
| Q13425 | 1 | 1   | 1   | 2.1 |
| Q9NQH7 | 1 | 1.1 | 1.5 | 1.7 |
| P01781 | 1 | 0.5 | 1.3 | 1   |
| Q16222 | 1 | 1.5 | 1.2 | 2.8 |
| B3KYA7 | 1 | 1.1 | 1   | 4.4 |
| B4E2I7 | 1 | 0.5 | 0.9 | 1.1 |
| P13284 | 1 | 1.7 | 1   | 3.8 |
| E7ESP4 | 1 | 1.9 | 1.3 | 1.3 |
| P19174 | 1 | 0.9 | 1.2 | 1.7 |
| F6T1Q0 | 1 | 0.8 | 0.9 | 1.5 |
| P23946 | 1 | 1.1 | 0.8 | 1.3 |
| Q6PKG0 | 1 | 0.9 | 1.1 | 3.1 |
| B7Z1Q2 | 1 | 1.4 | 1   | 0.9 |
| A2ACR0 | 1 | 1.2 | 1.3 | 3.3 |
| A6H8Z3 | 1 | 0.5 | 0.8 | 2.4 |
| A6NE29 | 1 | 0.8 | 1.1 | 0.6 |
| A6NGV1 | 1 | 2.9 | 3.7 | 0.4 |
| A6NKF9 | 1 | 1.3 | 1.9 | 1.2 |
| A8K3C2 | 1 | 0.7 | 0.5 | 0.9 |
| A8MUW5 | 1 | 1   | 0.9 | 0.5 |
| A8MYZ9 | 1 | 7.2 | 3.3 | 0.8 |

|        |   |      |     |      |
|--------|---|------|-----|------|
| A9Z1X7 | 1 | 0.8  | 1.6 | 0.6  |
| B1ALD8 | 1 | 1.4  | 0.9 | 15.8 |
| B1ALK7 | 1 | 1.2  | 1.1 | 1    |
| B1AUU8 | 1 | 1.3  | 1.9 | 1.2  |
| B1P7G3 | 1 | 1.3  | 1.3 | 0.8  |
| B2R8E1 | 1 | 1.1  | 1.2 | 1.4  |
| B3KNJ4 | 1 | 1.1  | 1.4 | 1.2  |
| B3KSH1 | 1 | 1.5  | 1.3 | 1.6  |
| B3KSY4 | 1 | 0.8  | 1.1 | 2.7  |
| B4DIB6 | 1 | 0.9  | 1.1 | 1.5  |
| B4DJM9 | 1 | 0.7  | 0.6 | 0.6  |
| B4DLH2 | 1 | 1.9  | 1.7 | 2.9  |
| B4DLN1 | 1 | 1.2  | 1.7 | 1.4  |
| B4DP38 | 1 | 1.1  | 0.9 | 2    |
| B4DT31 | 1 | 1    | 1.2 | 2.1  |
| B4DTC1 | 1 | 1    | 0.9 | 1.2  |
| B4DUX5 | 1 | 2.1  | 1.9 | 0.6  |
| B4DZM8 | 1 | 0.9  | 1.4 | 1    |
| B4E016 | 1 | 0.7  | 0.7 | 1.6  |
| B4E3Q1 | 1 | 1.2  | 1   | 1.2  |
| B5MCL2 | 1 | 10.2 | 1.9 | 0.7  |
| B5MEF0 | 1 | 1    | 0.4 | 0.5  |
| B7Z5X7 | 1 | 2.2  | 0.9 | 0.8  |
| B7Z6P0 | 1 | 0.7  | 1.1 | 0.9  |
| B7Z7L0 | 1 | 1.3  | 1.5 | 0.6  |
| B7Z9D1 | 1 | 0.9  | 1   | 1.1  |
| B8ZZJ1 | 1 | 0.8  | 0.8 | 1.1  |
| B8ZZM6 | 1 | 1.1  | 1.7 | 0.7  |
| C9IZ01 | 1 | 2.4  | 1.9 | 1.5  |
| C9IZD3 | 1 | 1    | 2.1 | 0.9  |
| C9J315 | 1 | 1.5  | 2.1 | 1.1  |
| C9J4G9 | 1 | 0.9  | 1.3 | 1    |
| C9J5W5 | 1 | 1    | 0.8 | 0.6  |
| C9JAF7 | 1 | 0.8  | 0.9 | 2    |
| C9JBI3 | 1 | 0.8  | 0.6 | 1.4  |
| C9JID8 | 1 | 0.9  | 0.5 | 0.6  |
| C9JIF9 | 1 | 0.8  | 1.1 | 0.8  |
| C9JK83 | 1 | 1    | 1   | 0.9  |
| C9JVN9 | 1 | 1.4  | 0.9 | 1.1  |
| D2X2H5 | 1 | 3.2  | 2.7 | 1    |
| D6RD47 | 1 | 0.9  | 1.4 | 1.6  |
| E5RFU3 | 1 | 1.4  | 1.3 | 1.3  |
| E5RIT4 | 1 | 1    | 1   | 2.1  |
| E5RIY1 | 1 | 1.1  | 1.2 | 1.1  |
| E5RJU9 | 1 | 1.3  | 1.7 | 2.2  |
| E7EQT4 | 1 | 2.6  | 1.5 | 0.6  |
| E7ERZ4 | 1 | 1.2  | 1   | 1.3  |



|        |   |     |     |      |
|--------|---|-----|-----|------|
| E7ETJ9 | 1 | 1.2 | 1.3 | 1.8  |
| E7ETU6 | 1 | 1   | 1.3 | 0.8  |
| E9PB30 | 1 | 1.6 | 2.3 | 1    |
| E9PB61 | 1 | 2   | 3.9 | 1.6  |
| E9PBV3 | 1 | 3   | 1.3 | 2.6  |
| E9PCY5 | 1 | 0.8 | 1.1 | 1.1  |
| E9PF24 | 1 | 1.2 | 1.3 | 2.1  |
| E9PJ54 | 1 | 1.5 | 2   | 0.9  |
| E9PJN0 | 1 | 1.4 | 1.8 | 1.2  |
| E9PJS4 | 1 | 1.1 | 1.2 | 2.1  |
| E9PKL9 | 1 | 1.2 | 0.9 | 1    |
| E9PN05 | 1 | 1.2 | 1.6 | 0.9  |
| E9PN86 | 1 | 0.8 | 0.7 | 1.4  |
| E9PNJ4 | 1 | 1   | 0.7 | 0.9  |
| E9PQ56 | 1 | 0.6 | 0.7 | 0.7  |
| E9PRK2 | 1 | 2.4 | 7.6 | 1.3  |
| E9PRT4 | 1 | 0.9 | 0.8 | 1.4  |
| F5GX07 | 1 | 1   | 1.1 | 1.4  |
| F5GXT8 | 1 | 2.4 | 1.8 | 1.2  |
| F5GY80 | 1 | 0.7 | 1.3 | 14.5 |
| F5GYC3 | 1 | 1.4 | 1.6 | 0.4  |
| F5GYJ8 | 1 | 0.9 | 0.5 | 0.2  |
| F5GYM0 | 1 | 1.1 | 1.1 | 1.5  |
| F5GZU8 | 1 | 1.2 | 3   | 0.5  |
| F5HOK8 | 1 | 6.2 | 1.5 | 1.8  |
| F5H2E3 | 1 | 1.9 | 1.3 | 0.8  |
| F5H6A3 | 1 | 1   | 1.1 | 1.3  |
| F6RWC2 | 1 | 1.1 | 0.8 | 0.8  |
| F8VP53 | 1 | 1.2 | 0.9 | 1    |
| F8VPF7 | 1 | 1.2 | 1.3 | 1.6  |
| F8VV32 | 1 | 1.5 | 0.9 | 4.2  |
| F8W061 | 1 | 1.4 | 1   | 0.9  |
| F8W720 | 1 | 1   | 0.8 | 1.1  |
| F8W785 | 1 | 1.4 | 1.5 | 1.2  |
| F8W9B8 | 1 | 1.1 | 0.9 | 0.9  |
| F8W9U3 | 1 | 0.6 | 0.6 | 1.2  |
| F8WBI3 | 1 | 1.5 | 1.2 | 1.9  |
| F8WEE0 | 1 | 0.9 | 0.9 | 1.9  |
| G3V2C6 | 1 | 1.1 | 1.4 | 1.5  |
| G3V2S9 | 1 | 1.5 | 1.6 | 2.6  |
| G5E933 | 1 | 1.6 | 1.1 | 0.6  |
| H0Y415 | 1 | 1.1 | 0.7 | 0.8  |
| H0Y8C3 | 1 | 1.6 | 1.1 | 2    |
| H0Y8X4 | 1 | 1.7 | 1.1 | 0.9  |
| H0YAV1 | 1 | 1.1 | 0.8 | 1.2  |
| H0YI90 | 1 | 0.9 | 0.7 | 1.3  |
| H0YJ66 | 1 | 1.1 | 1.3 | 1.1  |

|        |   |     |     |      |
|--------|---|-----|-----|------|
| HOYLH9 | 1 | 1.2 | 1.2 | 1.6  |
| HOYLR3 | 1 | 1.1 | 1.9 | 1.6  |
| HOYM76 | 1 | 1   | 1.3 | 1.1  |
| H3BN51 | 1 | 1.1 | 0.9 | 0.9  |
| H3BNB9 | 1 | 0.8 | 1.1 | 1.1  |
| H3BPR2 | 1 | 1.6 | 0.8 | 1.9  |
| H3BQ06 | 1 | 1.3 | 1.1 | 1.5  |
| H7BXW3 | 1 | 0.6 | 1.6 | 0.7  |
| H7COX7 | 1 | 1.3 | 1   | 1.3  |
| H7C5B8 | 1 | 2.9 | 1.3 | 2.2  |
| I3L097 | 1 | 1.6 | 1   | 1.5  |
| I3L2E3 | 1 | 0.5 | 0.6 | 1.1  |
| J3KNB4 | 1 | 0.7 | 0.6 | 14.2 |
| J3KQI0 | 1 | 0.3 | 0.2 | 0.2  |
| J3KRS1 | 1 | 1.1 | 1.3 | 0.5  |
| J3KTE4 | 1 | 0.6 | 2.4 | 2.4  |
| 000186 | 1 | 1.7 | 1.3 | 1.2  |
| 000468 | 1 | 0.6 | 1.2 | 2.5  |
| 014737 | 1 | 1.3 | 2.1 | 0.9  |
| 014907 | 1 | 0.9 | 0.8 | 0.6  |
| 015126 | 1 | 0.8 | 1   | 1    |
| 015240 | 1 | 0.8 | 0.5 | 1.1  |
| 043402 | 1 | 1.3 | 1.3 | 1.1  |
| 043815 | 1 | 0.9 | 1   | 0.7  |
| 043924 | 1 | 1.1 | 1   | 0.9  |
| 060220 | 1 | 1.2 | 1.4 | 1    |
| 060783 | 1 | 1.7 | 1.3 | 1.2  |
| 075438 | 1 | 1.1 | 0.9 | 1.4  |
| 075462 | 1 | 0.6 | 0.3 | 0.4  |
| 095183 | 1 | 2.3 | 1.4 | 2.7  |
| 095297 | 1 | 3.3 | 2.9 | 1.2  |
| P01880 | 1 | 1   | 4.7 | 2.1  |
| P02655 | 1 | 0.7 | 1.4 | 2.9  |
| P02745 | 1 | 1.2 | 2.2 | 2.2  |
| P02795 | 1 | 0.6 | 0.6 | 4.4  |
| P05186 | 1 | 1.7 | 2.9 | 1.1  |
| P05362 | 1 | 1.3 | 1.4 | 1.7  |
| P07357 | 1 | 1.4 | 2   | 7    |
| P07360 | 1 | 0.4 | 0.7 | 4.9  |
| P08621 | 1 | 1.2 | 3   | 3.7  |
| P13521 | 1 | 0.4 | 0.3 | 0.7  |
| P16144 | 1 | 1.2 | 2.1 | 0.4  |
| P23258 | 1 | 1.5 | 1.3 | 0.7  |
| P26447 | 1 | 0.5 | 0.6 | 2.3  |
| P35754 | 1 | 1.3 | 1.5 | 2.7  |
| P40222 | 1 | 1.1 | 1.1 | 6.6  |
| P41240 | 1 | 1   | 1.1 | 2.3  |

|        |   |     |     |     |
|--------|---|-----|-----|-----|
| P43121 | 1 | 1.1 | 1.2 | 1.7 |
| P48723 | 1 | 1.5 | 1.3 | 0.3 |
| P50402 | 1 | 1.2 | 1   | 1.1 |
| P50453 | 1 | 1.1 | 1.2 | 1.3 |
| P51687 | 1 | 1.3 | 0.7 | 0.9 |
| P51809 | 1 | 0.8 | 1.2 | 1.3 |
| P54886 | 1 | 0.8 | 0.8 | 1.2 |
| P56597 | 1 | 0.4 | 0.3 | 0.6 |
| Q05469 | 1 | 0.9 | 0.7 | 0.8 |
| Q06136 | 1 | 1.8 | 1.4 | 1.6 |
| Q06203 | 1 | 2.1 | 2.5 | 1   |
| Q13085 | 1 | 1.3 | 1.5 | 0.8 |
| Q13825 | 1 | 1.2 | 0.9 | 1.3 |
| Q15043 | 1 | 1   | 0.9 | 1   |
| Q15526 | 1 | 1.5 | 1.1 | 0.9 |
| Q15750 | 1 | 1.2 | 1.2 | 0.8 |
| Q2M2I8 | 1 | 0.5 | 0.4 | 0.1 |
| Q3ZAQ7 | 1 | 0.9 | 2   | 1.6 |
| Q53FA7 | 1 | 0.6 | 1.2 | 0.8 |
| Q5EBL8 | 1 | 0.8 | 0.9 | 0.8 |
| Q5RI15 | 1 | 1.8 | 1.5 | 1.7 |
| Q5T4F6 | 1 | 4   | 0.8 | 0.7 |
| Q5T4S7 | 1 | 1.1 | 1.1 | 1.2 |
| Q5ZPR3 | 1 | 1.1 | 1.2 | 1.2 |
| Q6KCM7 | 1 | 1.9 | 1.5 | 1.1 |
| Q6PGP7 | 1 | 1.2 | 1.5 | 0.9 |
| Q6PI48 | 1 | 1.7 | 1.1 | 1.4 |
| Q6PML9 | 1 | 2.3 | 1.6 | 0.6 |
| Q6Y1H2 | 1 | 1.1 | 0.9 | 1.2 |
| Q6ZMI0 | 1 | 0.6 | 0.6 | 0.7 |
| Q75MJ1 | 1 | 2.5 | 1.6 | 2.2 |
| Q7Z5R6 | 1 | 1.2 | 1.3 | 2.3 |
| Q86UX7 | 1 | 0.7 | 1   | 9.2 |
| Q86VF9 | 1 | 5.4 | 1.5 | 1.1 |
| Q86VQ2 | 1 | 1.9 | 0.8 | 0.5 |
| Q8IVP1 | 1 | 0.5 | 0.4 | 0.5 |
| Q8N1V2 | 1 | 0.4 | 0.4 | 0.4 |
| Q8N3E9 | 1 | 4.7 | 1.5 | 0.4 |
| Q8TCT9 | 1 | 1.4 | 1.9 | 1.7 |
| Q8TEA8 | 1 | 1   | 1.4 | 3.1 |
| Q8WX93 | 1 | 0.7 | 1.1 | 3   |
| Q8WY54 | 1 | 1   | 0.6 | 0.8 |
| Q8WZA9 | 1 | 2.4 | 1.6 | 0.6 |
| Q92506 | 1 | 1.4 | 0.9 | 1.2 |
| Q92623 | 1 | 0.9 | 0.9 | 1   |
| Q969H8 | 1 | 1.1 | 1.4 | 1.8 |
| Q969V3 | 1 | 1   | 1   | 1.3 |

|               |          |            |            |            |
|---------------|----------|------------|------------|------------|
| Q96B54        | 1        | 1.6        | 1.9        | 4.6        |
| Q96EE3        | 1        | 1.2        | 1          | 1.3        |
| Q96IJ6        | 1        | 0.8        | 0.7        | 5.3        |
| Q96KP1        | 1        | 1.4        | 1.3        | 1.5        |
| Q96LJ7        | 1        | 1.3        | 0.9        | 3.3        |
| Q9BPX5        | 1        | 1.4        | 1.4        | 0.8        |
| Q9BQ69        | 1        | 1.7        | 1.5        | 1.2        |
| Q9BQD3        | 1        | 1.1        | 0.9        | 1          |
| Q9BRJ7        | 1        | 1.5        | 1.1        | 1.3        |
| Q9BSF4        | 1        | 1.1        | 0.7        | 1.2        |
| Q9BVG4        | 1        | 0.9        | 1.1        | 2          |
| Q9BXJ8        | 1        | 1.5        | 1.3        | 0.6        |
| Q9C0C9        | 1        | 1.5        | 1.1        | 1          |
| Q9GZM7        | 1        | 0.8        | 0.6        | 0.9        |
| Q9GZN8        | 1        | 0.9        | 0.9        | 1.5        |
| Q9H1K0        | 1        | 0.8        | 1.1        | 0.6        |
| Q9H5X1        | 1        | 1.1        | 0.8        | 1.1        |
| Q9HBL7        | 1        | 3          | 2.6        | 2          |
| Q9NS69        | 1        | 2.4        | 2.1        | 0.8        |
| Q9UDY4        | 1        | 1          | 1.2        | 1.1        |
| Q9ULC3        | 1        | 0.8        | 0.7        | 0.5        |
| Q9UMF0        | 1        | 0.4        | 0.2        | 0.2        |
| Q9Y2Q5        | 1        | 1.2        | 1.6        | 1.7        |
| Q9Y333        | 1        | 1          | 1          | 1.3        |
| Q9Y678        | 1        | 0.8        | 1.2        | 1.5        |
| Q9Y6H1        | 1        | 2.1        | 2.7        | 1.6        |
| F5H045        | 1        | 1.3        | 1.2        | 1.1        |
| Q86UU1        | 1        | 1.3        | 0.9        | 1.8        |
| F5GZI4        | 1        | 0.9        | 0.9        | 0.9        |
| 015258        | 1        | 1.3        | 1.9        | 0.6        |
| C9JIY2        | 1        | 0.9        | 1.1        | 1.9        |
| A8K8E1        | 1        | 1.5        | 1.2        | 1.1        |
| H7BYM6        | 1        | 0.7        | 0.6        | 7.3        |
| 000505        | 1        | 0.9        | 0.9        | 0.6        |
| Q93034        | 1        | 0.9        | 0.9        | 0.9        |
| HOYGE4        | 1        | 0.8        | 0.7        | 1          |
| P63172        | 1        | 1.4        | 1.1        | 1.1        |
| Q9UGP8        | 1        | 1.7        | 0.9        | 1.5        |
| P54646        | 1        | 1.3        | 1          | 1          |
| P21953        | 1        | 1.5        | 1.2        | 3          |
| B4DS69        | 1        | 0.7        | 1.2        | 1          |
| B1AQP4        | 1        | 1.4        | 0.9        | 0.8        |
| <b>P14780</b> | <b>1</b> | <b>1.5</b> | <b>1.5</b> | <b>8.3</b> |
| D6RCF4        | 1        | 1.5        | 2.1        | 1.7        |
| P61457        | 1        | 1          | 1          | 0.9        |
| P30419        | 1        | 0.8        | 1          | 2.9        |
| HOYENO        | 1        | 0.8        | 0.6        | 1.3        |

|        |   |     |     |     |
|--------|---|-----|-----|-----|
| H9KV70 | 1 | 1.2 | 1.2 | 6.3 |
| A5YKK6 | 1 | 1.3 | 1.4 | 1.1 |
| C9IYD9 | 1 | 0.6 | 1   | 2.5 |
| Q9Y6I3 | 1 | 0.6 | 0.7 | 0.8 |
| 095479 | 1 | 2.1 | 1.6 | 2.4 |
| D6RIF8 | 1 | 1.1 | 1.1 | 0.7 |
| Q6MZV4 | 1 | 1   | 1   | 1.2 |
| H3BQ15 | 1 | 1   | 0.9 | 1.3 |
| B4DME9 | 1 | 0.7 | 0.6 | 2.1 |
| Q7Z6L0 | 1 | 1.9 | 0.6 | 0.4 |
| HOYE28 | 1 | 1.3 | 1   | 1.5 |
| HOYDR8 | 1 | 3.4 | 1.5 | 0.8 |
| E7EMIO | 1 | 0.8 | 1   | 2   |
| Q12882 | 1 | 1.3 | 1.3 | 0.9 |
| B7Z3K3 | 1 | 0.6 | 0.8 | 1.2 |
| B0QYC6 | 1 | 1.8 | 1.1 | 0.7 |
| B5MCE7 | 1 | 0.8 | 0.9 | 0.6 |
| C9JVH3 | 1 | 4.9 | 2.1 | 1.3 |
| E9PRB2 | 1 | 2   | 1.6 | 1   |
| F5GZK2 | 1 | 1.2 | 0.4 | 0.2 |
| 000401 | 1 | 1.1 | 1.3 | 1.8 |
| 075937 | 1 | 1.3 | 1.4 | 1.4 |
| P46734 | 1 | 1   | 0.9 | 2.5 |
| P62280 | 1 | 0.8 | 1.8 | 1   |
| Q13155 | 1 | 1.1 | 1.1 | 1.3 |
| Q5TGZ0 | 1 | 1.5 | 1.1 | 0.8 |
| Q9BZH6 | 1 | 1.8 | 1.7 | 0.7 |
| Q9ULZ3 | 1 | 1.9 | 0.8 | 2.6 |
| F8WCZ6 | 1 | 1   | 0.9 | 1.9 |
| E9PQP6 | 1 | 1.1 | 1.2 | 0.7 |
| B3KY94 | 1 | 1.3 | 1.4 | 0.9 |
| H3BUS9 | 1 | 1   | 0.9 | 2.1 |
| B7ZBH1 | 1 | 0.7 | 0.7 | 2.5 |
| 095164 | 1 | 3.2 | 1.1 | 1.3 |
| J3QRP2 | 1 | 3   | 1.5 | 1.3 |
| Q06210 | 1 | 0.8 | 0.8 | 0.8 |
| B7Z3Q0 | 1 | 0.9 | 0.5 | 1.1 |
| Q13158 | 1 | 0.9 | 1.2 | 1.3 |
| HOYCE7 | 1 | 1.1 | 1.2 | 0.9 |
| 095470 | 1 | 1.7 | 1.8 | 1.5 |
| Q8WUY1 | 1 | 1.1 | 1   | 0.9 |
| Q8NA54 | 1 | 4   | 2.5 | 0.7 |
| H3BNI9 | 1 | 1.2 | 1.1 | 0.8 |
| E9PHT6 | 1 | 1.2 | 1.2 | 1.3 |
| Q15437 | 1 | 1   | 1.3 | 1.2 |
| F5H6E2 | 1 | 0.8 | 1.1 | 1.9 |
| P36405 | 1 | 0.6 | 0.6 | 0.9 |

|        |   |     |     |     |
|--------|---|-----|-----|-----|
| E7EM72 | 1 | 0.8 | 0.5 | 1.2 |
| P07738 | 1 | 1   | 0.9 | 1   |
| C9J3I4 | 1 | 0.8 | 1.3 | 1.6 |
| 000459 | 1 | 2   | 1.6 | 1   |
| P42229 | 1 | 0.8 | 0.8 | 3   |
| B2RDM2 | 1 | 1.3 | 2.1 | 2.1 |
| Q16610 | 1 | 1.1 | 1.3 | 3.4 |
| E7EPK6 | 1 | 0.8 | 0.9 | 1.7 |
| E5RGR9 | 1 | 1   | 1.1 | 1.7 |
| Q93052 | 1 | 1.1 | 1   | 2.4 |
| BOLM41 | 1 | 0.8 | 1.1 | 0.9 |
| D6R9I9 | 1 | 1.3 | 1.6 | 2.8 |
| P10070 | 1 | 2.6 | 1   | 0.8 |
| E7ETH0 | 1 | 0.6 | 2   | 2.8 |
| B5MCT7 | 1 | 1.1 | 1.1 | 1.3 |
| J3KRZ3 | 1 | 0.9 | 2.4 | 0.8 |
